# Supplementary material for: A novel method to identify Post‐Aire stages of medullary thymic epithelial cell differentiation
Source: PubMed Central journal article supplement — Eur J Immunol. 2020 Sep 15;51(2):311–8. doi: 10.1002/eji.202048764 (PMC7891440; doi:10.1002/eji.202048764), 2020-09-15
Supplement: EJI-51-311-s001.pdf [file EJI-51-311-s001.pdf]

## Supplementary Figure 1

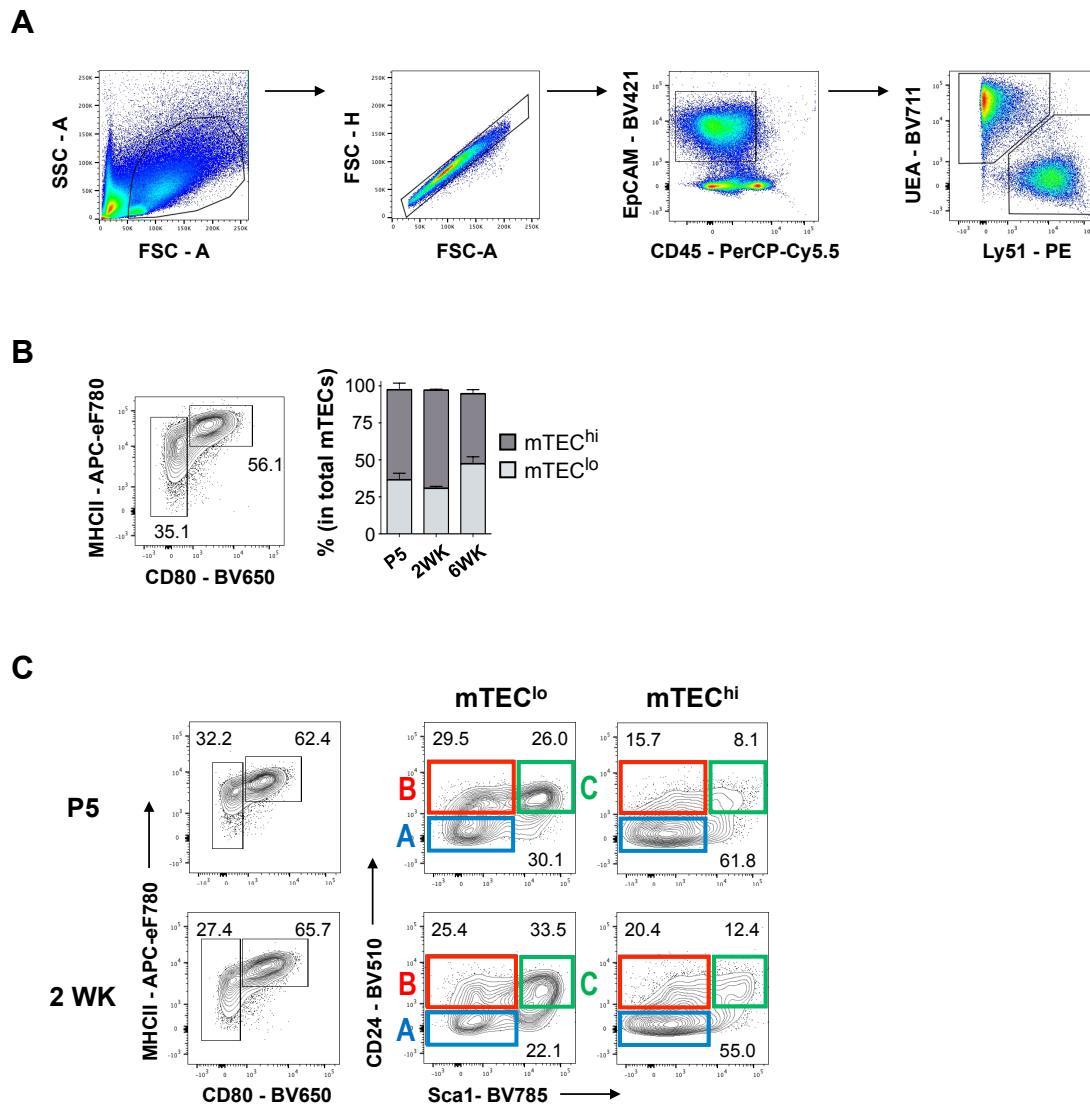

**Supplementary Figure 1 – (A)** Flow cytometry analysis and gating strategy used to identify TECs (CD45-EpCAM<sup>+</sup>MHCII<sup>+</sup>) and mTECs (UEA<sup>+</sup>Ly51<sup>+</sup>). Cells were stained with PerCP-Cy5-conjugated anti-CD45.2, PE-conjugated anti-Ly51, APC-eFlour 780-conjugated anti-MHCII, BV421-conjugated anti-EpCAM, BV650-conjugated anti-CD80, BV510-conjugated anti-CD24, BV786-conjugated anti-Sca1, Biotinylated UEA: BV711-conjugated streptavidin. **(B)** Thymi from C57BL/6 mice were isolated at the indicated time points. Total mTECs (CD45-EpCAM<sup>+</sup>UEA<sup>+</sup>) were analysed for CD80 and MHCII expression and subdivided in mTEC<sup>lo</sup> (MHCII<sup>lo</sup>CD80<sup>lo</sup>) and mTEC<sup>hi</sup> (MHCII<sup>hi</sup>CD80<sup>hi</sup>). Bar graphs correspond to the frequency of mTEC<sup>lo</sup> and mTEC<sup>hi</sup> at different time points and are displayed as mean plus SD. **(C)** Representation of mTEC<sup>A-C</sup> subsets within mTEC<sup>lo</sup> and mTEC<sup>hi</sup>. Representative data from three independent experiments per time point. Numbers in plots indicate the frequency of cells found within each gate. P – Postnatal day; WK – Postnatal weeks.

## Supplementary Figure 2

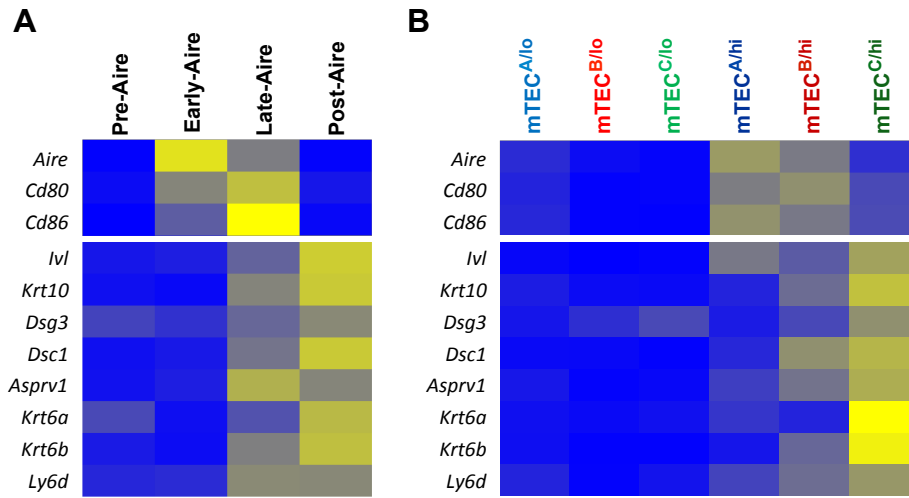

**Supplementary Figure 2** – Heatmap showing the deviation to the average expression level of selected genes associated with post-Aire mTECs in Pre-, Early-, Late- and Post-Aire cells (as defined in (15)) and in mTEC<sup>A-C/lo-hi</sup>.

### Supplementary Figure 3

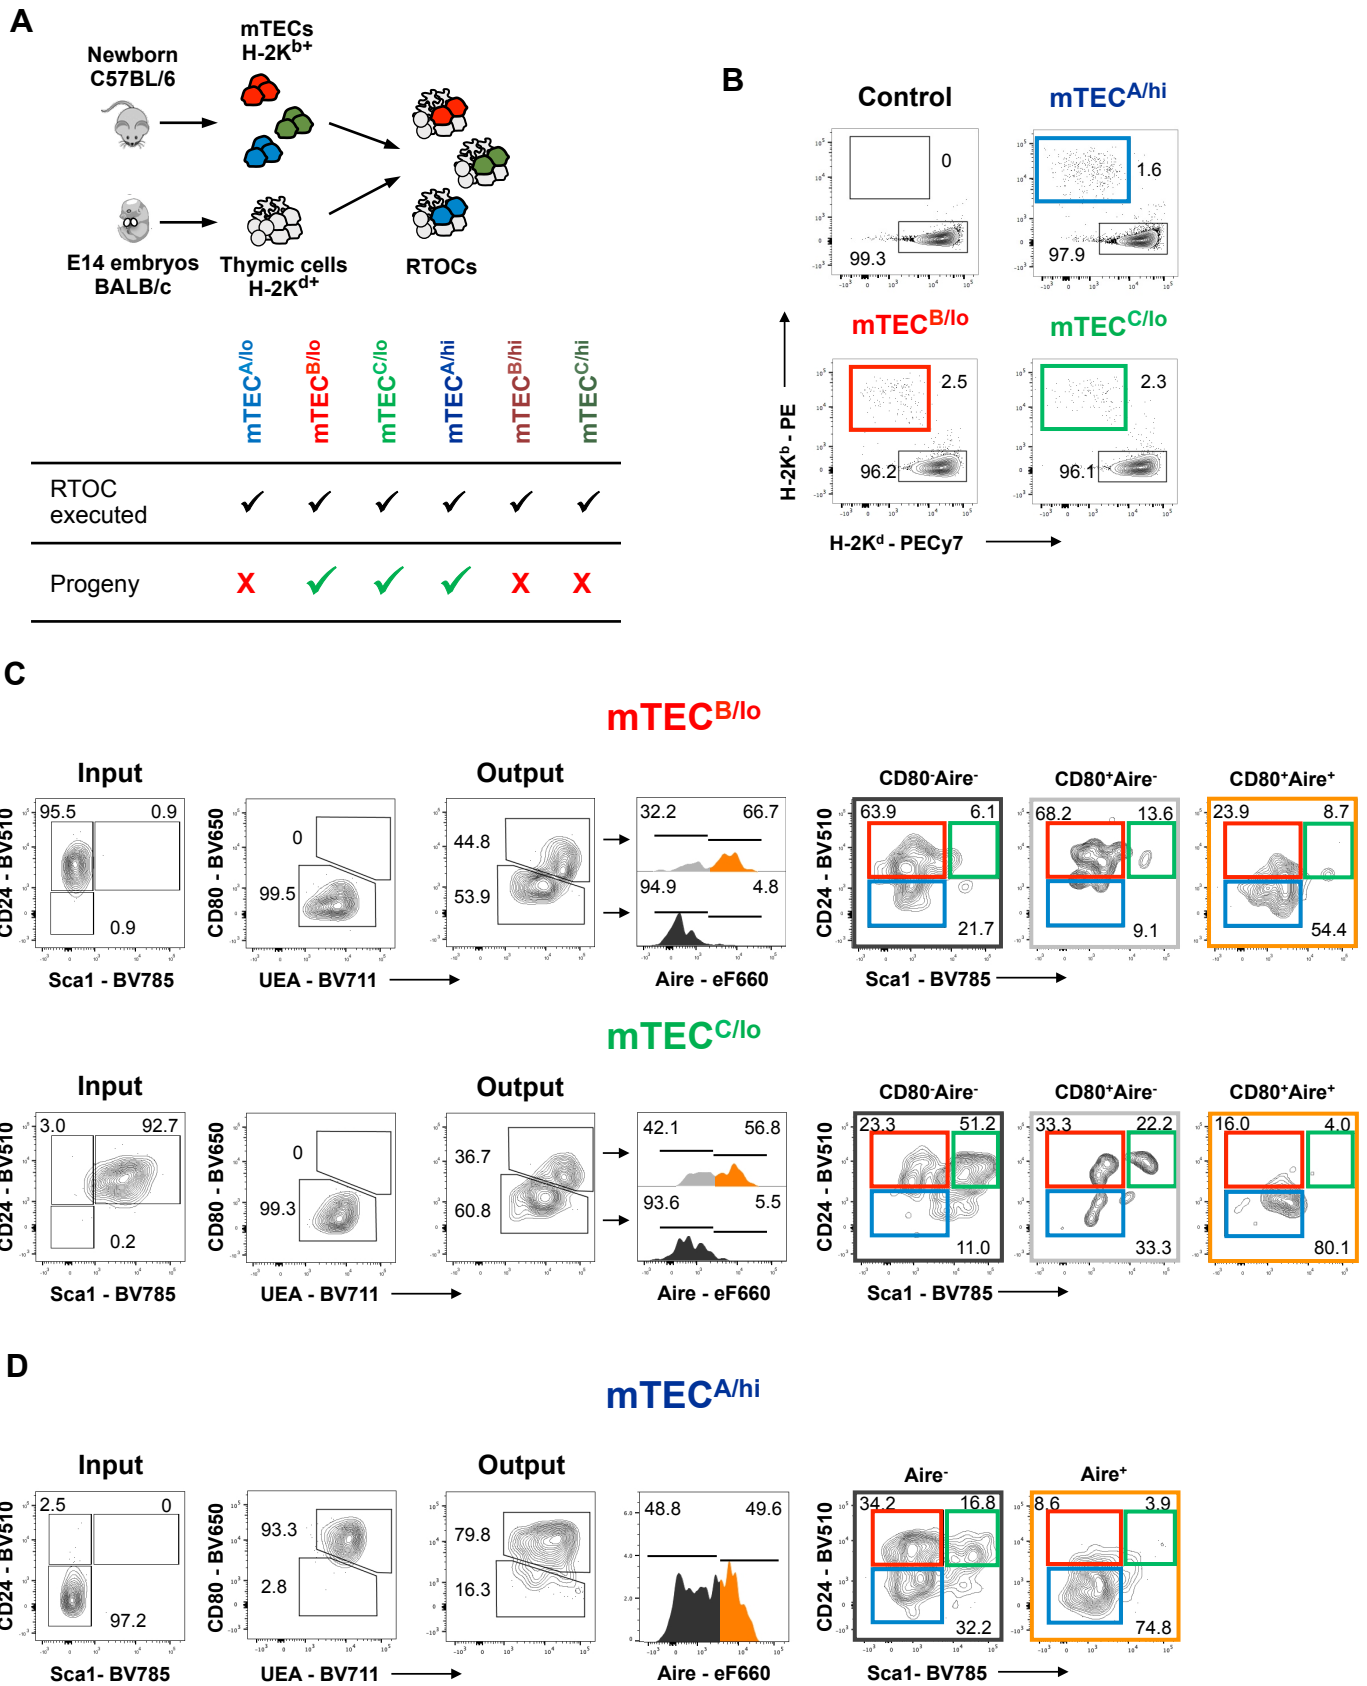

Legend on the next page

**Supplementary Figure 3 – Reaggregate thymus organ cultures (RTOCs) with discrete mTEC<sup>A-C/hi</sup> subsets.** **(A)** Schematic outlines of the established chimeric RTOCs. Table depicts the success of recovering spiked populations and their progeny. RTOCs were established by spiking the 6 mTEC<sup>A-C/hi-lo</sup> subsets isolated from P3 C57BL/6 mice into E14 total thymic cells from BALB/c mice. Cells were stained with PerCP-Cy5-conjugated anti-CD45.2, PE-conjugated anti-H-2K<sup>b</sup>, PE-Cy7-conjugated anti-H-2K<sup>d</sup>, BV421-conjugated anti-EpCAM, eFlour 660-conjugated anti-AIRE, BV650-conjugated anti-CD80, BV510-conjugated anti-CD24, BV786-conjugated anti-Sca1, Biotinylated UEA: BV711-conjugated streptavidin. **(B)** Detection of mTEC<sup>A/hi</sup> (blue), mTEC<sup>B/lo</sup> (red) and mTEC<sup>C/lo</sup> (green) cells isolated from P3 C57BL/6 mice (H-2K<sup>b</sup>) in 7-day-old RTOCs established with fetal thymus cells from BALB/c mice (H-2K<sup>d</sup>). **(C)** Lineage potential of mTEC<sup>B/lo</sup> and mTEC<sup>C/lo</sup>. Input: purity assessment on day 0; Output: After 7 days in culture, RTOCs were dissociated and the progeny of C57BL/6-derived mTECs was analysed for the expression of CD24, Sca1, CD80 and UEA binding in total mTEC population (CD45-EpCAM<sup>+</sup>UEA<sup>+</sup>). Histograms depict the expression of Aire in mTEC<sup>lo/hi</sup> cells that derived from mTEC<sup>B-C/lo</sup> subsets after culture (output). Aire<sup>-</sup> and Aire<sup>+</sup> cells were further analysed for the expression of CD24 and Sca1. Data corresponds to a representative analysis of at least three experiments. **(D)** Lineage potential of mTEC<sup>A/hi</sup>. Input: purity assessment on day 0; Output: After 7 days in culture, RTOCs were dissociated and the progeny of C57BL/6-derived mTECs was analysed for the expression of CD80, UEA binding and Aire in total mTEC population (CD45-EpCAM<sup>+</sup>UEA<sup>+</sup>). Aire<sup>-</sup> and Aire<sup>+</sup> cells that derived from mTEC<sup>A/hi</sup> after culture were further analysed for the expression of CD24 and Sca1. Data corresponds to a representative analysis of at least three experiments.



Supplementary Table 1 - A. Normalized counts of Are-Dependent TRAs across mTEC<sup>ΔH</sup>, mTEC<sup>ΔC</sup>, mTEC<sup>ΔS</sup>, mTEC<sup>ΔM</sup>, mTEC<sup>ΔN</sup> and mTEC<sup>ΔD</sup>.

| geneID             | mTEC <sup>ΔH</sup> | mTEC <sup>ΔC</sup> | mTEC <sup>ΔS</sup> | mTEC <sup>ΔM</sup> | mTEC <sup>ΔN</sup> | mTEC <sup>ΔD</sup> |        |        |       |       |       |       |        |        |        |        |       |       | mTEC <sup>ΔD</sup> |        |       |       |       |       |        |        |       |
|--------------------|--------------------|--------------------|--------------------|--------------------|--------------------|--------------------|--------|--------|-------|-------|-------|-------|--------|--------|--------|--------|-------|-------|--------------------|--------|-------|-------|-------|-------|--------|--------|-------|
| ENSMUSG00000000003 | Pbin               | 0.00               | 0.00               | 0.00               | 0.00               | 0.00               | 0.00   | 0.00   | 0.00  | 0.00  | 0.00  | 0.00  | 0.00   | 0.00   | 0.00   | 0.00   | 0.00  | 0.00  | 0.00               |        |       |       |       |       |        |        |       |
| ENSMUSG00000000003 | Scm2b              | 134.57             | 157.98             | 138.82             | 17.95              | 15.96              | 142.53 | 174.04 | 93.74 | 58.27 | 41.71 | 0.00  | 44.08  | 180.84 | 62.84  | 49.78  | 16.77 | 14.84 | 14.11              | 129.31 | 45.31 | 84.31 | 0.00  | 39.14 | 0.00   | 0.00   |       |
| ENSMUSG00000000003 | Thx2               | 147.85             | 250.41             | 0.00               | 29.92              | 28.85              | 181.28 | 0.00   | 70.84 | 46.82 | 80.58 | 22.91 | 112.86 | 37.99  | 135.72 | 155.16 | 69.75 | 78.75 | 90.29              | 20.25  | 22.48 | 27.63 | 24.34 | 80.39 | 163.60 | 292.92 | 61.53 |











































Table with columns: ENMSUSG0000023873, 170001014R, 58.87, 0.00, 70.80, 15.19, 0.00, 40.06, 44.75, 18.60, 0.00, 161.16, 55.75, 38.65, 34.78, 15.66, 0.00, 110.28, 111.04, 142.64, 192.70, 79.97, 307.01, 27.93, 308.93, 193.18, 93.97, ...























Table with multiple columns containing alphanumeric identifiers and numerical values, organized into rows.













|                   |             |          |          |          |          |          |          |          |          |          |          |          |          |          |          |          |         |         |         |         |         |         |          |         |         |         |
|-------------------|-------------|----------|----------|----------|----------|----------|----------|----------|----------|----------|----------|----------|----------|----------|----------|----------|---------|---------|---------|---------|---------|---------|----------|---------|---------|---------|
| ENSMUSG0000001825 | Ces2c       | 203.72   | 58.03    | 0.00     | 42.80    | 24.55    | 57.80    | 84.54    | 27.91    | 83.91    | 31.28    | 294.80   | 183.21   | 222.57   | 60.03    | 594.77   | 555.16  | 788.72  | 766.54  | 743.10  | 928.96  | 697.26  | 492.51   | 310.67  | 1185.58 | 928.62  |
| ENSMUSG0000001878 | Sgh1r       | 1142.89  | 739.40   | 873.44   | 652.33   | 699.15   | 815.74   | 895.80   | 845.78   | 1244.69  | 468.32   | 1594.67  | 2047.74  | 2557.21  | 2260.31  | 2976.74  | 2667.25 | 1987.38 | 1809.65 | 1681.31 | 2388.76 | 1690.07 | 1573.15  | 2463.90 | 1719.65 | 1011.28 |
| ENSMUSG0000001921 | ADnB        | 24.27    | 235.36   | 301.83   | 173.27   | 285.50   | 167.48   | 166.23   | 115.92   | 365.28   | 160.21   | 251.15   | 429.91   | 357.04   | 120.96   | 52.16    | 348.74  | 399.55  | 284.19  | 390.58  | 238.39  | 356.65  | 143.86   | 239.79  | 295.56  | 344.55  |
| ENSMUSG0000001906 | Up23hs      | 0.00     | 0.00     | 0.00     | 0.00     | 0.00     | 0.00     | 0.00     | 0.00     | 0.00     | 0.00     | 0.00     | 0.00     | 0.00     | 0.00     | 0.00     | 0.00    | 0.00    | 0.00    | 0.00    | 0.00    | 0.00    | 0.00     | 0.00    | 0.00    | 0.00    |
| ENSMUSG0000002007 | Hah2d       | 161.77   | 739.70   | 0.00     | 90.43    | 74.89    | 200.98   | 0.00     | 121.64   | 555.91   | 143.15   | 37.12    | 174.35   | 20.87    | 0.00     | 0.00     | 0.00    | 32.14   | 193.03  | 67.51   | 185.47  | 273.07  | 147.39   | 237.69  | 118.88  | 325.53  |
| ENSMUSG0000002012 | ZlP13       | 61.67    | 30.70    | 383.81   | 346.53   | 219.14   | 612.79   | 709.68   | 366.36   | 675.45   | 369.64   | 402.77   | 533.23   | 822.17   | 435.31   | 739.90   | 483.61  | 496.51  | 287.85  | 426.20  | 360.47  | 238.74  | 234.64   | 295.01  | 600.99  | 285.26  |
| ENSMUSG0000002040 | ZlP27       | 198.11   | 252.56   | 194.51   | 318.92   | 364.00   | 179.96   | 200.33   | 319.14   | 0.00     | 383.00   | 350.55   | 71.89    | 194.75   | 232.30   | 0.00     | 241.29  | 94.44   | 26.23   | 274.80  | 239.05  | 203.14  | 214.94   | 192.32  | 412.87  | 238.28  |
| ENSMUSG0000002028 | ZlP36H60201 | 17.20    | 0.00     | 0.00     | 0.00     | 0.00     | 0.00     | 0.00     | 0.00     | 0.00     | 0.00     | 0.00     | 0.00     | 0.00     | 0.00     | 0.00     | 0.00    | 0.00    | 0.00    | 0.00    | 0.00    | 0.00    | 0.00     | 0.00    | 0.00    | 0.00    |
| ENSMUSG0000002082 | Cz2004      | 0.00     | 0.00     | 0.00     | 0.00     | 0.00     | 0.00     | 0.00     | 0.00     | 0.00     | 0.00     | 0.00     | 0.00     | 0.00     | 0.00     | 0.00     | 0.00    | 0.00    | 0.00    | 0.00    | 0.00    | 0.00    | 0.00     | 0.00    | 0.00    | 0.00    |
| ENSMUSG0000002151 | Unc13c      | 122.42   | 463.43   | 0.00     | 0.00     | 27.62    | 0.00     | 0.00     | 0.00     | 0.00     | 0.00     | 325.35   | 109.77   | 104.33   | 78.30    | 162.34   | 172.49  | 85.15   | 37.02   | 0.00    | 156.53  | 117.61  | 0.00     | 52.24   | 63.13   | 0.00    |
| ENSMUSG0000002157 | Ifnrl1      | 504.63   | 554.67   | 574.59   | 640.60   | 793.68   | 1071.89  | 784.98   | 528.23   | 1459.13  | 1515.87  | 1076.59  | 51.79    | 55.64    | 15.66    | 242.79   | 58.44   | 131.80  | 270.03  | 234.85  | 134.41  | 286.39  | 526.36   | 687.46  | 2524.24 | 741.68  |
| ENSMUSG0000002170 | Frrfrrb     | 0.00     | 0.00     | 0.00     | 0.00     | 10.51    | 0.00     | 0.00     | 0.00     | 0.00     | 0.00     | 0.00     | 0.00     | 0.00     | 0.00     | 0.00     | 0.00    | 0.00    | 0.00    | 0.00    | 0.00    | 42.00   | 0.00     | 0.00    | 0.00    |         |
| ENSMUSG0000002222 | Ww1         | 0.00     | 0.00     | 0.00     | 0.00     | 0.00     | 0.00     | 0.00     | 0.00     | 0.00     | 0.00     | 0.00     | 0.00     | 0.00     | 0.00     | 0.00     | 0.00    | 0.00    | 0.00    | 0.00    | 0.00    | 0.00    | 0.00     | 0.00    | 0.00    |         |
| ENSMUSG0000002210 | Glpi1       | 0.00     | 0.00     | 0.00     | 0.00     | 0.00     | 0.00     | 0.00     | 0.00     | 0.00     | 0.00     | 69.50    | 3.09     | 4.64     | 0.00     | 0.00     | 0.00    | 0.00    | 0.00    | 0.00    | 0.00    | 3.05    | 0.00     | 0.00    | 0.00    | 0.00    |
| ENSMUSG0000002234 | Serpb9be    | 28.03    | 0.00     | 0.00     | 0.00     | 49.72    | 0.00     | 0.00     | 0.00     | 0.00     | 0.00     | 0.00     | 0.00     | 0.00     | 0.00     | 0.00     | 44.30   | 28.02   | 0.00    | 0.00    | 0.00    | 75.71   | 0.00     | 67.71   | 90.00   | 99.56   |
| ENSMUSG0000002245 | Serpb2b     | 955.06   | 307.37   | 0.00     | 35.90    | 0.00     | 76.19    | 83.12    | 65.83    | 265.72   | 342.23   | 1532.04  | 1275.52  | 1224.12  | 1148.43  | 1885.19  | 2246.10 | 4433.46 | 3362.33 | 3607.11 | 4091.86 | 8059.33 | 8270.61  | 5531.13 | 6977.09 | 856.75  |
| ENSMUSG0000002293 | Dppk3       | 18.69    | 0.00     | 75.27    | 6.21     | 60.16    | 0.00     | 0.00     | 0.00     | 0.00     | 1689.37  | 1186.62  | 1414.23  | 1312.86  | 0.00     | 261.09   | 429.65  | 14.82   | 114.42  | 335.18  | 606.67  | 78.92   | 688.25   | 47.98   | 77.19   |         |
| ENSMUSG0000002379 | AdnB        | 47.64    | 75.50    | 0.00     | 0.00     | 0.00     | 0.00     | 0.00     | 0.00     | 0.00     | 61.72    | 23.27    | 48.55    | 0.00     | 0.00     | 0.00     | 0.00    | 0.00    | 0.00    | 0.00    | 0.00    | 0.00    | 0.00     | 0.00    | 0.00    |         |
| ENSMUSG0000002444 | Abp3c       | 184.10   | 0.00     | 143.09   | 19.33    | 85.32    | 17.73    | 34.35    | 0.00     | 0.00     | 258.14   | 286.84   | 431.00   | 281.82   | 200.29   | 169.77   | 114.13  | 190.43  | 49.09   | 123.27  | 428.28  | 132.08  | 428.28   | 132.08  | 428.28  | 132.08  |
| ENSMUSG0000002478 | Ctrc        | 0.00     | 0.00     | 0.00     | 0.00     | 0.00     | 0.00     | 0.00     | 0.00     | 0.00     | 0.00     | 0.00     | 0.00     | 0.00     | 0.00     | 0.00     | 0.00    | 0.00    | 0.00    | 0.00    | 0.00    | 0.00    | 0.00     | 0.00    | 0.00    | 0.00    |
| ENSMUSG0000002510 | Nhl1        | 412.11   | 1258.48  | 255.62   | 430.75   | 410.04   | 518.21   | 438.31   | 363.50   | 356.82   | 377.31   | 702.83   | 337.82   | 635.24   | 268.84   | 183.89   | 396.81  | 267.75  | 489.98  | 657.59  | 295.19  | 390.25  | 350.34   | 359.40  | 347.21  | 230.45  |
| ENSMUSG0000002519 | ZlP39b      | 1098.97  | 702.86   | 681.91   | 505.99   | 117.24   | 1048.91  | 511.48   | 1103.38  | 996.45   | 698.20   | 1115.81  | 1019.36  | 874.04   | 615.58   | 435.31   | 713.51  | 1342.91 | 174.16  | 1134.52 | 760.62  | 1010.58 | 628.75   | 363.75  | 748.72  | 726.02  |
| ENSMUSG0000002527 | Nhl1b       | 0.00     | 0.00     | 0.00     | 0.00     | 0.00     | 0.00     | 0.00     | 0.00     | 0.00     | 0.00     | 0.00     | 0.00     | 0.00     | 0.00     | 0.00     | 0.00    | 0.00    | 0.00    | 0.00    | 0.00    | 0.00    | 0.00     | 0.00    | 0.00    |         |
| ENSMUSG0000002542 | Sy1b        | 26.17    | 0.00     | 0.00     | 48.32    | 0.00     | 9.20     | 0.00     | 0.00     | 0.00     | 52.14    | 71.70    | 50.25    | 67.23    | 33.93    | 0.00     | 6.25    | 22.83   | 0.00    | 93.94   | 102.53  | 12.15   | 88.27    | 26.51   | 51.46   |         |
| ENSMUSG0000002545 | Tr12        | 148.59   | 0.00     | 55.89    | 31.06    | 3.68     | 206.89   | 64.65    | 52.95    | 0.00     | 0.00     | 224.54   | 548.86   | 331.53   | 417.61   | 426.69   | 666.38  | 272.94  | 393.07  | 333.61  | 368.35  | 354.36  | 432.43   | 325.46  | 243.68  | 86.14   |
| ENSMUSG0000002556 | Scqbt1b2    | 0.00     | 0.00     | 0.00     | 0.00     | 0.00     | 0.00     | 0.00     | 0.00     | 0.00     | 0.00     | 0.00     | 0.00     | 0.00     | 0.00     | 0.00     | 0.00    | 0.00    | 0.00    | 0.00    | 0.00    | 0.00    | 0.00     | 0.00    | 0.00    | 0.00    |
| ENSMUSG0000002563 | Cy11        | 12.15    | 153.68   | 51.42    | 131.85   | 66.89    | 381.31   | 49.02    | 99.46    | 0.00     | 0.00     | 1089.16  | 71.73    | 0.00     | 28.95    | 147.98   | 50.85   | 0.00    | 2.41    | 12.01   | 75.61   | 0.00    | 0.00     | 266.41  | 9.00    |         |
| ENSMUSG0000002629 | Kcnj15      | 203.40   | 287.76   | 298.48   | 219.58   | 173.69   | 173.69   | 173.69   | 173.69   | 173.69   | 173.69   | 173.69   | 173.69   | 173.69   | 173.69   | 173.69   | 173.69  | 173.69  | 173.69  | 173.69  | 173.69  | 173.69  | 173.69   | 173.69  | 173.69  | 173.69  |
| ENSMUSG0000002609 | Conn15      | 5651.84  | 5015.64  | 5150.47  | 7551.18  | 6269.91  | 7657.94  | 5872.77  | 7307.93  | 9028.63  | 6473.01  | 12161.47 | 13447.80 | 10040.57 | 11732.23 | 12911.44 | 8976.87 | 6456.12 | 9565.12 | 6557.83 | 6945.10 | 9705.87 | 10658.34 | 8172.25 | 7622.28 | 8656.31 |
| ENSMUSG0000002651 | H2af1b      | 0.00     | 0.00     | 0.00     | 0.00     | 0.00     | 0.00     | 0.00     | 0.00     | 0.00     | 0.00     | 0.00     | 0.00     | 0.00     | 0.00     | 0.00     | 0.00    | 0.00    | 0.00    | 0.00    | 0.00    | 0.00    | 0.00     | 0.00    | 0.00    |         |
| ENSMUSG0000002694 | Capv3       | 0.00     | 0.00     | 0.00     | 0.00     | 0.00     | 0.00     | 0.00     | 0.00     | 0.00     | 0.00     | 0.00     | 0.00     | 0.00     | 0.00     | 0.00     | 0.00    | 0.00    | 0.00    | 0.00    | 0.00    | 0.00    | 0.00     | 0.00    | 0.00    |         |
| ENSMUSG0000002729 | Ppxp        | 1914.78  | 1429.36  | 1119.38  | 1078.94  | 1535.19  | 1844.95  | 990.99   | 1735.93  | 2372.83  | 1174.58  | 962.30   | 891.32   | 658.43   | 1325.91  | 1083.24  | 1175.36 | 1301.39 | 1392.62 | 1080.33 | 1462.35 | 1431.94 | 1647.62  | 1148.69 | 1178.00 | 958.71  |
| ENSMUSG0000002829 | AdnB        | 114.94   | 0.00     | 0.00     | 24.55    | 0.00     | 36.12    | 14.92    | 71.16    | 0.00     | 0.00     | 81.72    | 23.27    | 48.55    | 0.00     | 0.00     | 0.00    | 0.00    | 0.00    | 0.00    | 0.00    | 0.00    | 0.00     | 0.00    | 0.00    |         |
| ENSMUSG0000002937 | Phd2c       | 0.00     | 0.00     | 0.00     | 0.00     | 0.00     | 0.00     | 0.00     | 0.00     | 0.00     | 0.00     | 0.00     | 0.00     | 0.00     | 0.00     | 0.00     | 0.00    | 0.00    | 0.00    | 0.00    | 0.00    | 0.00    | 0.00     | 0.00    | 0.00    |         |
| ENSMUSG0000002970 | 1810041151f | 1401.75  | 1045.69  | 1495.73  | 1118.98  | 886.98   | 1518.55  | 1932.96  | 1146.31  | 550.97   | 737.55   | 595.05   | 478.28   | 591.19   | 373.24   | 420.94   | 1302.61 | 1322.15 | 595.59  | 708.17  | 654.19  | 969.14  | 776.84   | 801.21  | 1642.63 | 841.24  |
| ENSMUSG0000002978 | Chn1a       | 46.72    | 2.15     | 0.00     | 103.74   | 0.00     | 0.00     | 0.00     | 0.00     | 0.00     | 111.87   | 368.12   | 27.22    | 266.42   | 237.52   | 425.25   | 480.70  | 211.67  | 315.76  | 561.24  | 284.46  | 434.12  | 410.29   | 223.48  | 187.94  |         |
| ENSMUSG0000002975 | Krcn3       | 189.70   | 0.00     | 129.93   | 60.06    | 0.00     | 1.21     | 34.57    | 29.34    | 36.13    | 0.00     | 268.83   | 502.48   | 299.66   | 258.40   | 728.38   | 306.20  | 209.43  | 43.18   | 389.01  | 462.25  | 217.47  | 190.00   | 180.14  | 233.58  | 61.53   |
| ENSMUSG0000002981 | Ww1b        | 1153.90  | 702.42   | 959.48   | 1207.40  | 955.64   | 1320.47  | 810.75   | 853.96   | 1485.84  | 985.49   | 826.59   | 666.25   | 0.00     | 0.00     | 0.00     | 0.00    | 0.00    | 0.00    | 0.00    | 0.00    | 0.00    | 0.00     | 0.00    | 0.00    |         |
| ENSMUSG0000002990 | Cped1       | 0.00     | 0.00     | 0.00     | 40.04    | 0.00     | 0.00     | 0.00     | 0.00     | 0.00     | 0.00     | 0.00     | 0.00     | 0.00     | 0.00     | 0.00     | 0.00    | 0.00    | 0.00    | 0.00    | 0.00    | 62.95   | 81.48    | 10.15   | 0.00    |         |
| ENSMUSG0000003011 | Maln        | 11384.98 | 10460.09 | 15812.87 | 13943.36 | 18089.29 | 14782.56 | 14998.23 | 11779.78 | 14036.51 | 18225.48 | 7288.48  | 6868.25  | 4970.67  | 5882.92  | 5854.36  | 6376.37 | 1       |         |         |         |         |          |         |         |         |

Table with columns: Item ID, Name, and numerical values. Contains data for items such as ENSMUS0000009631, ENSMUS0000009632, ENSMUS0000009633, etc., up to ENSMUS0000007444.









|                      |         |          |          |          |          |          |          |          |          |          |          |          |         |         |         |         |         |         |         |         |         |          |         |         |         |         |
|----------------------|---------|----------|----------|----------|----------|----------|----------|----------|----------|----------|----------|----------|---------|---------|---------|---------|---------|---------|---------|---------|---------|----------|---------|---------|---------|---------|
| ENSMUSG000000056214  | Pan9g   | 3710.89  | 4587.01  | 6781.84  | 6695.90  | 5696.34  | 6379.48  | 7082.55  | 6883.61  | 7271.38  | 7294.93  | 1392.28  | 1372.92 | 1240.35 | 1354.62 | 817.45  | 1386.50 | 2214.65 | 1515.66 | 1743.94 | 1172.26 | 3384.72  | 3384.94 | 3067.53 | 4339.53 | 2905.20 |
| ENSMUSG000000031880  | Pan3    | 215.87   | 596.45   | 1577.71  | 1821.01  | 774.04   | 1895.85  | 1037.87  | 1703.16  | 462.88   | 581.13   | 668.26   | 831.02  | 716.39  | 1443.36 | 877.79  | 645.65  | 408.89  | 615.19  | 485.36  | 483.20  | 800.36   | 802.23  | 950.28  | 436.86  | 819.99  |
| ENSMUSG000000091955  | Qm9844  | 0.93     | 4.30     | 2.98     | 1.38     | 0.00     | 1.31     | 0.71     | 14.31    | 1.17     | 2.84     | 0.00     | 2.32    | 0.00    | 0.00    | 1.44    | 0.00    | 1.04    | 2.18    | 1.20    | 0.00    | 0.00     | 0.85    | 0.00    | 0.00    | 1.12    |
| ENSMUSG0000000019539 | Rm3     | 1187.75  | 3253.13  | 1755.08  | 1678.12  | 1367.61  | 2368.41  | 1883.62  | 1431.82  | 2382.61  | 2077.09  | 113.80   | 153.06  | 257.34  | 341.92  | 1104.79 | 552.34  | 377.76  | 381.09  | 330.00  | 189.71  | 326.10   | 552.99  | 557.81  | 439.38  | 661.14  |
| ENSMUSG0000000027200 | Semwde4 | 12036.27 | 9802.38  | 12110.43 | 14349.94 | 15276.76 | 8728.22  | 8562.29  | 10322.55 | 9338.64  | 12211.31 | 7887.68  | 8984.27 | 5297.41 | 7934.08 | 4835.77 | 6595.04 | 6874.35 | 8016.02 | 828.30  | 6044.21 | 5845.84  | 6558.33 | 4949.82 | 4645.08 | 6543.13 |
| ENSMUSG000000001601  | Pcb     | 2251.20  | 2565.32  | 3555.62  | 2810.90  | 2727.86  | 2337.71  | 2465.04  | 1798.18  | 2566.29  | 2431.64  | 2565.44  | 2380.19 | 1602.02 | 2602.23 | 1706.74 | 1882.48 | 2916.20 | 1931.60 | 1409.12 | 1165.46 | 2094.07  | 1545.23 | 1689.97 | 2313.07 | 1933.07 |
| ENSMUSG000000001435  | Cot18a1 | 3717.43  | 5864.68  | 5859.96  | 5830.96  | 5984.22  | 11459.16 | 9118.52  | 7218.49  | 8079.94  | 9580.58  | 2146.08  | 1985.94 | 1347.00 | 1991.48 | 1795.81 | 2632.55 | 2762.61 | 2123.23 | 1933.02 | 2424.49 | 3116.19  | 3537.27 | 3672.34 | 4727.15 | 4936.72 |
| ENSMUSG000000003398  | Ek3     | 1574.63  | 2063.43  | 2976.56  | 3052.50  | 2295.28  | 4395.97  | 3296.48  | 3370.97  | 3111.71  | 3160.66  | 1817.67  | 2662.45 | 2165.39 | 2119.37 | 2086.62 | 1900.51 | 1716.51 | 2152.63 | 1247.73 | 1404.50 | 2110.87  | 1948.04 | 2154.67 | 1673.38 | 2707.20 |
| ENSMUSG0000000022562 | Opah    | 832.64   | 788.83   | 1234.15  | 1138.99  | 1592.27  | 2341.49  | 2069.36  | 1840.40  | 3872.74  | 2953.05  | 493.37   | 425.95  | 210.98  | 101.79  | 426.69  | 352.51  | 1553.58 | 853.65  | 952.66  | 1288.81 | 1886.38  | 1459.76 | 2118.99 | 2006.26 | 1938.67 |
| ENSMUSG0000000037833 | Sh2040  | 4884.62  | 6525.00  | 4223.37  | 5877.45  | 5281.23  | 5332.35  | 4052.04  | 8763.06  | 7797.33  | 7368.98  | 3720.12  | 2606.69 | 2234.95 | 2662.26 | 3311.48 | 4616.62 | 4169.67 | 3833.80 | 3961.20 | 3105.05 | 3432.07  | 4554.44 | 2839.55 | 5562.73 | 6894.99 |
| ENSMUSG0000000079523 | Thm10   | 6636.78  | 11830.34 | 7540.81  | 7827.77  | 6217.48  | 6502.96  | 8024.53  | 6392.56  | 9999.44  | 8436.38  | 2903.64  | 4295.11 | 3336.19 | 3492.26 | 7099.76 | 4342.24 | 4789.42 | 6121.44 | 5846.66 | 4084.20 | 3225.87  | 3376.64 | 4638.70 | 4728.41 | 6323.00 |
| ENSMUSG0000000040225 | Pm2c    | 9237.51  | 6696.48  | 8595.05  | 10239.93 | 9829.86  | 9247.06  | 10902.30 | 10106.46 | 10423.96 | 9892.48  | 10484.47 | 9966.80 | 7377.18 | 9286.60 | 5352.96 | 8483.92 | 9072.40 | 7935.45 | 6189.29 | 8611.62 | 10135.83 | 7350.41 | 8073.05 | 9759.85 | 8186.47 |
| ENSMUSG0000000012428 | Shap4   | 2768.92  | 4889.80  | 5142.27  | 9155.16  | 5193.61  | 6234.99  | 9899.43  | 5334.79  | 8647.89  | 8905.60  | 1297.58  | 2138.23 | 1847.77 | 1888.71 | 2248.96 | 831.13  | 1193.54 | 1847.76 | 1636.76 | 1568.69 | 2000.13  | 2624.18 | 2217.25 | 2435.04 | 2883.91 |
| ENSMUSG000000003554  | Symm    | 2393.25  | 4091.40  | 2153.79  | 2741.18  | 2412.96  | 3138.21  | 1960.67  | 2648.97  | 1660.75  | 2376.66  | 882.11   | 613.30  | 994.60  | 709.94  | 166.65  | 2353.55 | 1677.08 | 692.50  | 715.40  | 558.06  | 1923.76  | 1384.60 | 1224.40 | 3313.05 | 1473.30 |
| ENSMUSG0000000050315 | Sympo2  | 2033.47  | 1670.09  | 3198.64  | 2973.81  | 3158.77  | 4261.96  | 3789.20  | 3703.70  | 5366.83  | 6287.20  | 3050.33  | 3347.26 | 2589.66 | 2583.96 | 2759.81 | 3393.19 | 3534.73 | 2830.98 | 3227.73 | 3316.87 | 3927.71  | 3357.87 | 3044.91 | 4771.34 | 4356.12 |

Supplementary Table 2 - Normalized counts of the top 200 specifically upregulated genes of iTEC as across iTEC<sup>hi</sup>, iTEC<sup>int</sup>, iTEC<sup>lo</sup>, iTEC<sup>mid</sup>, iTEC<sup>pl</sup>, and iTEC<sup>pl</sup>.

| GeneID            | iTEC <sup>hi</sup> | iTEC <sup>int</sup> | iTEC <sup>lo</sup> | iTEC <sup>mid</sup> | iTEC <sup>pl</sup> | iTEC <sup>pl</sup> |
|-------------------|--------------------|---------------------|--------------------|---------------------|--------------------|--------------------|
| ENMNSG00000002077 | 30851.4            | 15008.09            | 12644.03           | 10159.83            | 6952.84            | 6079.15            |
| ENMNSG00000002078 | 5152.6             | 2526.93             | 2140.27            | 1632.99             | 1058.99            | 927.96             |
| ENMNSG00000002079 | 6003.21            | 3169.17             | 597.70             | 82.44               | 28.43              | 27.37              |
| ENMNSG00000002080 | 10268.45           | 6636.30             | 5468.70            | 4876.09             | 4510.20            | 3426.52            |
| ENMNSG00000002081 | 5060.15            | 2634.49             | 2502.39            | 2049.88             | 1662.53            | 1509.22            |
| ENMNSG00000002082 | 5776.13            | 4533.10             | 2793.22            | 2471.22             | 1511.45            | 5871.36            |
| ENMNSG00000002083 | 10797.18           | 9655.98             | 8598.78            | 7819.56             | 6260.65            | 5082.11            |
| ENMNSG00000002084 | 3559.27            | 1818.32             | 1219.56            | 830.16              | 586.36             | 399.13             |
| ENMNSG00000002085 | 6056.10            | 3178.10             | 2337.73            | 2354.65             | 1670.00            | 1481.27            |
| ENMNSG00000002086 | 7322.60            | 3178.10             | 3486.31            | 3473.70             | 3366.34            | 4048.59            |
| ENMNSG00000002087 | 7172.00            | 3536.29             | 3574.12            | 3574.12             | 3535.44            | 3535.44            |
| ENMNSG00000002088 | 8600.18            | 3409.14             | 4610.16            | 3165.71             | 2579.70            | 3897.37            |
| ENMNSG00000002089 | 2698.35            | 1695.11             | 1058.55            | 665.07              | 434.93             | 308.83             |
| ENMNSG00000002090 | 3092.25            | 1691.11             | 523.29             | 1093.99             | 673.30             | 1487.11            |
| ENMNSG00000002091 | 5121.05            | 2947.68             | 2692.00            | 2499.57             | 2224.52            | 1716.87            |
| ENMNSG00000002092 | 15045.29           | 9296.78             | 5923.22            | 5648.48             | 5419.58            | 5540.70            |
| ENMNSG00000002093 | 4131.41            | 3249.69             | 8116.60            | 6962.82             | 4388.73            | 1221.48            |
| ENMNSG00000002094 | 494.35             | 232.07              | 105.08             | 45.47               | 46.04              | 0.00               |
| ENMNSG00000002095 | 9056.46            | 762.49              | 48.09              | 0.00                | 0.00               | 37.67              |
| ENMNSG00000002096 | 2759.57            | 2070.80             | 2287.19            | 2947.58             | 2471.19            | 2271.87            |
| ENMNSG00000002097 | 1836.29            | 2189.17             | 988.40             | 1339.10             | 1003.00            | 1121.19            |
| ENMNSG00000002098 | 5004.48            | 3391.62             | 3364.88            | 3235.32             | 2955.04            | 2869.19            |
| ENMNSG00000002099 | 4534.18            | 3888.93             | 5031.98            | 5011.80             | 4535.58            | 5194.09            |
| ENMNSG00000002100 | 10070.97           | 1478.79             | 4582.69            | 3811.18             | 3124.39            | 3516.18            |
| ENMNSG00000002101 | 16454.25           | 2342.69             | 336.40             | 55.42               | 14.12              | 0.00               |
| ENMNSG00000002102 | 2079.23            | 931.77              | 1998.78            | 1816.12             | 1251.60            | 1031.44            |
| ENMNSG00000002103 | 1475.12            | 18098.96            | 17095.44           | 14914.17            | 14453.81           | 12906.71           |
| ENMNSG00000002104 | 576.12             | 2936.42             | 4336.20            | 5816.40             | 8292.10            | 11093.20           |
| ENMNSG00000002105 | 8293.53            | 7414.14             | 5652.03            | 5399.22             | 3736.99            | 3749.01            |
| ENMNSG00000002106 | 2089.85            | 3201.19             | 1611.14            | 1524.87             | 1944.00            | 2093.11            |
| ENMNSG00000002107 | 3486.70            | 505.04              | 183.58             | 895.68              | 915.72             | 744.89             |
| ENMNSG00000002108 | 2669.20            | 2019.07             | 178.12             | 1105.57             | 74.89              | 12.18              |
| ENMNSG00000002109 | 2146.27            | 1898.10             | 2146.27            | 2146.27             | 2146.27            | 2146.27            |
| ENMNSG00000002110 | 11111.65           | 10365.61            | 7128.38            | 6263.78             | 4822.45            | 4648.30            |
| ENMNSG00000002111 | 3373.54            | 2116.12             | 2830.42            | 2302.84             | 1724.26            | 1910.44            |
| ENMNSG00000002112 | 7145.17            | 7789.93             | 6283.27            | 5268.20             | 5476.95            | 5476.95            |
| ENMNSG00000002113 | 5927.52            | 3341.25             | 4179.40            | 3960.25             | 3848.87            | 3037.04            |
| ENMNSG00000002114 | 7748.85            | 8687.98             | 6038.34            | 6091.67             | 6230.44            | 5009.41            |
| ENMNSG00000002115 | 2486.32            | 6485.84             | 8546.61            | 7319.95             | 6391.80            | 5899.27            |
| ENMNSG00000002116 | 9346.99            | 6485.84             | 8546.61            | 7319.95             | 6391.80            | 5899.27            |
| ENMNSG00000002117 | 9346.99            | 6485.84             | 8546.61            | 7319.95             | 6391.80            | 5899.27            |
| ENMNSG00000002118 | 9346.99            | 6485.84             | 8546.61            | 7319.95             | 6391.80            | 5899.27            |
| ENMNSG00000002119 | 9346.99            | 6485.84             | 8546.61            | 7319.95             | 6391.80            | 5899.27            |
| ENMNSG00000002120 | 9346.99            | 6485.84             | 8546.61            | 7319.95             | 6391.80            | 5899.27            |
| ENMNSG00000002121 | 9346.99            | 6485.84             | 8546.61            | 7319.95             | 6391.80            | 5899.27            |
| ENMNSG00000002122 | 9346.99            | 6485.84             | 8546.61            | 7319.95             | 6391.80            | 5899.27            |
| ENMNSG00000002123 | 9346.99            | 6485.84             | 8546.61            | 7319.95             | 6391.80            | 5899.27            |
| ENMNSG00000002124 | 9346.99            | 6485.84             | 8546.61            | 7319.95             | 6391.80            | 5899.27            |
| ENMNSG00000002125 | 9346.99            | 6485.84             | 8546.61            | 7319.95             | 6391.80            | 5899.27            |
| ENMNSG00000002126 | 9346.99            | 6485.84             | 8546.61            | 7319.95             | 6391.80            | 5899.27            |
| ENMNSG00000002127 | 9346.99            | 6485.84             | 8546.61            | 7319.95             | 6391.80            | 5899.27            |
| ENMNSG00000002128 | 9346.99            | 6485.84             | 8546.61            | 7319.95             | 6391.80            | 5899.27            |
| ENMNSG00000002129 | 9346.99            | 6485.84             | 8546.61            | 7319.95             | 6391.80            | 5899.27            |
| ENMNSG00000002130 | 9346.99            | 6485.84             | 8546.61            | 7319.95             | 6391.80            | 5899.27            |
| ENMNSG00000002131 | 9346.99            | 6485.84             | 8546.61            | 7319.95             | 6391.80            | 5899.27            |
| ENMNSG00000002132 | 9346.99            | 6485.84             | 8546.61            | 7319.95             | 6391.80            | 5899.27            |
| ENMNSG00000002133 | 9346.99            | 6485.84             | 8546.61            | 7319.95             | 6391.80            | 5899.27            |
| ENMNSG00000002134 | 9346.99            | 6485.84             | 8546.61            | 7319.95             | 6391.80            | 5899.27            |
| ENMNSG00000002135 | 9346.99            | 6485.84             | 8546.61            | 7319.95             | 6391.80            | 5899.27            |
| ENMNSG00000002136 | 9346.99            | 6485.84             | 8546.61            | 7319.95             | 6391.80            | 5899.27            |
| ENMNSG00000002137 | 9346.99            | 6485.84             | 8546.61            | 7319.95             | 6391.80            | 5899.27            |
| ENMNSG00000002138 | 9346.99            | 6485.84             | 8546.61            | 7319.95             | 6391.80            | 5899.27            |
| ENMNSG00000002139 | 9346.99            | 6485.84             | 8546.61            | 7319.95             | 6391.80            | 5899.27            |
| ENMNSG00000002140 | 9346.99            | 6485.84             | 8546.61            | 7319.95             | 6391.80            | 5899.27            |
| ENMNSG00000002141 | 9346.99            | 6485.84             | 8546.61            | 7319.95             | 6391.80            | 5899.27            |
| ENMNSG00000002142 | 9346.99            | 6485.84             | 8546.61            | 7319.95             | 6391.80            | 5899.27            |
| ENMNSG00000002143 | 9346.99            | 6485.84             | 8546.61            | 7319.95             | 6391.80            | 5899.27            |
| ENMNSG00000002144 | 9346.99            | 6485.84             | 8546.61            | 7319.95             | 6391.80            | 5899.27            |
| ENMNSG00000002145 | 9346.99            | 6485.84             | 8546.61            | 7319.95             | 6391.80            | 5899.27            |
| ENMNSG00000002146 | 9346.99            | 6485.84             | 8546.61            | 7319.95             | 6391.80            | 5899.27            |
| ENMNSG00000002147 | 9346.99            | 6485.84             | 8546.61            | 7319.95             | 6391.80            | 5899.27            |
| ENMNSG00000002148 | 9346.99            | 6485.84             | 8546.61            | 7319.95             | 6391.80            | 5899.27            |
| ENMNSG00000002149 | 9346.99            | 6485.84             | 8546.61            | 7319.95             | 6391.80            | 5899.27            |
| ENMNSG00000002150 | 9346.99            | 6485.84             | 8546.61            | 7319.95             | 6391.80            | 5899.27            |
| ENMNSG00000002151 | 9346.99            | 6485.84             | 8546.61            | 7319.95             | 6391.80            | 5899.27            |
| ENMNSG00000002152 | 9346.99            | 6485.84             | 8546.61            | 7319.95             | 6391.80            | 5899.27            |
| ENMNSG00000002153 | 9346.99            | 6485.84             | 8546.61            | 7319.95             | 6391.80            | 5899.27            |
| ENMNSG00000002154 | 9346.99            | 6485.84             | 8546.61            | 7319.95             | 6391.80            | 5899.27            |
| ENMNSG00000002155 | 9346.99            | 6485.84             | 8546.61            | 7319.95             | 6391.80            | 5899.27            |
| ENMNSG00000002156 | 9346.99            | 6485.84             | 8546.61            | 7319.95             | 6391.80            | 5899.27            |
| ENMNSG00000002157 | 9346.99            | 6485.84             | 8546.61            | 7319.95             | 6391.80            | 5899.27            |
| ENMNSG00000002158 | 9346.99            | 6485.84             | 8546.61            | 7319.95             | 6391.80            | 5899.27            |
| ENMNSG00000002159 | 9346.99            | 6485.84             | 8546.61            | 7319.95             | 6391.80            | 5899.27            |
| ENMNSG00000002160 | 9346.99            | 6485.84             | 8546.61            | 7319.95             | 6391.80            | 5899.27            |
| ENMNSG00000002161 | 9346.99            | 6485.84             | 8546.61            | 7319.95             | 6391.80            | 5899.27            |
| ENMNSG00000002162 | 9346.99            | 6485.84             | 8546.61            | 7319.95             | 6391.80            | 5899.27            |
| ENMNSG00000002163 | 9346.99            | 6485.84             | 8546.61            | 7319.95             | 6391.80            | 5899.27            |
| ENMNSG00000002164 | 9346.99            | 6485.84             | 8546.61            | 7319.95             | 6391.80            | 5899.27            |
| ENMNSG00000002165 | 9346.99            | 6485.84             | 8546.61            | 7319.95             | 6391.80            | 5899.27            |
| ENMNSG00000002166 | 9346.99            | 6485.84             | 8546.61            | 7319.95             | 6391.80            | 5899.27            |
| ENMNSG00000002167 | 9346.99            | 6485.84             | 8546.61            | 7319.95             | 6391.80            | 5899.27            |
| ENMNSG00000002168 | 9346.99            | 6485.84             | 8546.61            | 7319.95             | 6391.80            | 5899.27            |
| ENMNSG00000002169 | 9346.99            | 6485.84             | 8546.61            | 7319.95             | 6391.80            | 5899.27            |
| ENMNSG00000002170 | 9346.99            | 6485.84             | 8546.61            | 7319.95             | 6391.80            | 5899.27            |
| ENMNSG00000002171 | 9346.99            | 6485.84             | 8546.61            | 7319.95             | 6391.80            | 5899.27            |
| ENMNSG00000002172 | 9346.99            | 6485.84             | 8546.61            | 7319.95             | 6391.80            | 5899.27            |
| ENMNSG00000002173 | 9346.99            | 6485.84             | 8546.61            | 7319.95             | 6391.80            | 5899.27            |
| ENMNSG00000002174 | 9346.99            | 6485.84             | 8546.61            | 7319.95             | 6391.80            | 5899.27            |
| ENMNSG00000002175 | 9346.99            | 6485.84             | 8546.61            | 7319.95             | 6391.80            | 5899.27            |
| ENMNSG00000002176 | 9346.99            | 6485.84             | 8546.61            | 7319.95             | 6391.80            | 5899.27            |
| ENMNSG00000002177 | 9346.99            | 6485.84             | 8546.61            | 7319.95             | 6391.80            | 5899.27            |
| ENMNSG00000002178 | 9346.99            | 6485.84             | 8546.61            | 7319.95             | 6391.80            | 5899.27            |
| ENMNSG00000002179 | 9346.99            | 6485.84             | 8546.61            | 7319.95             | 6391.80            | 5899.27            |
| ENMNSG00000002180 | 9346.99            | 6485.84             | 8546.61            | 7319.95             | 6391.80            | 5899.27            |
| ENMNSG00000002181 | 9346.99            | 6485.84             | 8546.61            | 7319.95             | 6391.80            | 5899.27            |
| ENMNSG00000002182 | 9346.99            | 6485.84             | 8546.61            | 7319.95             | 6391.80            | 5899.27            |
| ENMNSG00000002183 | 9346.99            | 6485.84             | 8546.61            | 7319.95             | 6391.80            | 5899.27            |
| ENMNSG00000002184 | 9346.99            | 6485.84             | 8546.61            | 7319.95             | 6391.80            | 5899.27            |
| ENMNSG00000002185 | 9346.99            | 6485.84             | 8546.61            | 7319.95             | 6391.80            | 5899.27            |
| ENMNSG00000002186 | 9346.99            | 6485.84             | 8546.61            | 7319.95             | 6391.80            | 5899.27            |
| ENMNSG00000002187 | 9346.99            | 6485.84             | 8546.61            | 7319.95             | 6391.80            | 5899.27            |
| ENMNSG00000002188 | 9346.99            | 6485.84             | 8546.61            | 7319.95             | 6391.80            | 5899.27            |
| ENMNSG00000002189 | 9346.99            | 6485.84             | 8546.61            | 7319.95             | 6391.80            | 5899.27            |
| ENMNSG00000002190 | 9346.99            | 6485.84             | 8546.61            | 7319.95             | 6391.80            | 5899.27            |
| ENMNSG00000002191 | 9346.99            | 6485.84             | 8546.61            | 7319.95             | 6391.80            | 5899.27            |
| ENMNSG00000002192 | 9346.99            | 6485.84             | 8546.61            | 7319.95             | 6391.80            | 5899.27            |
| ENMNSG00000002193 | 9346.99            | 6485.84             | 8546.61            | 7319.95             | 6391.80            | 5899.27            |
| ENMNSG00000002194 | 9346.99            | 6485.84             | 8546.61            | 7319.95             | 6391.80            | 5899.27            |
| ENMNSG00000002195 | 9346.99            | 6485.84             | 8546.61            | 7319.95             | 6391.80            | 5899.27            |
| ENMNSG00000002196 | 9346.99            | 6485.84             | 8546.61            | 7319.95             | 6391.80            | 5899.27            |
| ENMNSG00000002197 | 9346.99            | 6485.84             | 8546.61            | 7319.95             | 6391.80            | 5899.27            |
| ENMNSG00000002198 | 9346.99            | 6485.84             | 8546.61            | 7319.95             | 6391.80            | 5899.27            |
| ENMNSG00000002199 | 9346.99            | 6485.84             | 8546.61            | 7319.95             | 6391.80            | 5899.27            |
| ENMNSG00000002200 | 9346.99            | 6485.84             | 8546.61            | 7319.95             | 6391.80            | 5899.27            |
| ENMNSG00000002201 | 9346.99            | 6485.84             | 8546.61            | 7319.95             | 6391.80            | 5899.27            |
| ENMNSG00000002202 | 9346.99            | 64                  |                    |                     |                    |                    |

|                    |         |          |         |          |          |          |         |          |          |         |         |          |          |          |          |          |          |          |          |          |          |          |         |          |         |          |
|--------------------|---------|----------|---------|----------|----------|----------|---------|----------|----------|---------|---------|----------|----------|----------|----------|----------|----------|----------|----------|----------|----------|----------|---------|----------|---------|----------|
| ENSMUSG00000040936 | Lk4     | 253.25   | 155.83  | 316.73   | 140.13   | 132.59   | 185.22  | 240.11   | 195.35   | 99.06   | 152.63  | 216.90   | 511.75   | 359.35   | 365.41   | 235.61   | 796.46   | 830.24   | 463.84   | 550.40   | 364.95   | 617.83   | 565.29  | 169.69   | 308.07  | 578.36   |
| ENSMUSG00000050558 | Phn2    | 1608.25  | 836.12  | 591.30   | 384.50   | 125.84   | 611.48  | 410.60   | 377.81   | 116.54  | 203.82  | 3886.76  | 3677.35  | 3280.55  | 3006.79  | 2438.00  | 5169.90  | 2989.89  | 2925.71  | 3352.99  | 4499.84  | 3381.17  | 2681.72 | 3004.88  | 3309.28 | 2625.53  |
| ENSMUSG00000079037 | Php     | 11632.62 | 8895.33 | 6296.68  | 8410.61  | 6014.30  | 5821.86 | 5955.88  | 4526.58  | 4340.08 | 5816.99 | 16406.42 | 19916.94 | 17371.84 | 17054.15 | 15530.20 | 17501.32 | 13656.62 | 15511.58 | 19001.39 | 18018.64 | 12567.53 | 9195.20 | 11513.04 | 8711.90 | 10889.19 |
| ENSMUSG00000018286 | Phn6    | 3199.54  | 4414.88 | 3792.61  | 4017.54  | 3200.51  | 2990.00 | 3654.04  | 3318.01  | 3302.84 | 3206.28 | 3928.62  | 3611.64  | 3848.56  | 4337.92  | 8055.31  | 3484.62  | 3482.84  | 4292.20  | 3832.33  | 2991.06  | 2899.29  | 3332.48 | 4385.05  | 3172.90 | 3333.85  |
| ENSMUSG00000030386 | Chn2    | 1013.93  | 1046.76 | 515.18   | 947.73   | 721.25   | 742.18  | 755.85   | 656.45   | 631.87  | 603.88  | 983.68   | 1024.28  | 755.80   | 649.91   | 1318.85  | 1320.52  | 1371.15  | 1354.51  | 1436.62  | 846.44   | 500.22   | 620.17  | 1435.87  | 719.68  | 511.23   |
| ENSMUSG00000025938 | Sloc6a1 | 4347.28  | 1707.70 | 2329.67  | 2050.19  | 2489.08  | 1232.15 | 1303.56  | 1787.45  | 762.19  | 1075.99 | 10438.65 | 12004.54 | 8783.69  | 10834.37 | 4107.39  | 9616.87  | 6580.65  | 6369.70  | 6746.92  | 8548.67  | 5783.50  | 5392.22 | 6001.92  | 3914.04 | 3513.76  |
| ENSMUSG00000031957 | Cbn1    | 442.95   | 64.48   | 0.00     | 0.00     | 0.00     | 0.00    | 33.39    | 0.00     | 0.00    | 0.00    | 1434.28  | 1045.92  | 510.05   | 874.37   | 1831.73  | 1504.21  | 882.13   | 1093.19  | 1911.35  | 1473.41  | 748.43   | 633.13  | 982.48   | 825.74  | 507.88   |
| ENSMUSG00000008882 | Rpl10   | 8788.19  | 7392.89 | 11622.43 | 13467.74 | 10793.68 | 9365.94 | 12058.49 | 11601.96 | 8332.86 | 6927.10 | 11649.92 | 11914.09 | 9297.41  | 9868.64  | 12098.50 | 8203.98  | 5502.20  | 7357.27  | 7948.89  | 6130.43  | 7591.18  | 9401.88 | 11718.41 | 6890.86 | 5918.91  |
| ENSMUSG00000036330 | Sct18a1 | 396.23   | 226.76  | 38.75    | 136.68   | 0.00     | 0.00    | 0.00     | 0.00     | 0.00    | 70.15   | 2229.32  | 1865.35  | 1620.57  | 1346.79  | 1749.84  | 1879.45  | 1161.29  | 1450.33  | 1540.40  | 1766.05  | 894.29   | 833.54  | 671.81   | 630.03  | 663.37   |
| ENSMUSG00000021497 | Tncd15  | 2223.17  | 1029.97 | 1672.36  | 1678.81  | 1931.47  | 1418.88 | 1123.12  | 1347.38  | 1533.71 | 1725.19 | 3646.28  | 3388.23  | 4340.06  | 3019.84  | 5054.14  | 3665.59  | 3516.05  | 3134.76  | 6324.49  | 3683.52  | 2853.95  | 2531.09 | 2018.91  | 1850.96 | 2079.82  |
| ENSMUSG00000019179 | Mbn2    | 5151.42  | 6024.79 | 5548.44  | 4708.46  | 4021.81  | 4634.54 | 4277.95  | 4681.87  | 4307.85 | 4225.28 | 7506.69  | 6403.50  | 6359.40  | 6543.93  | 9095.07  | 6158.64  | 5696.16  | 5660.25  | 6394.04  | 6766.16  | 5512.39  | 5645.24 | 5485.01  | 5520.96 | 7009.82  |
| ENSMUSG00000025848 | Apod    | 656.02   | 216.02  | 0.00     | 22.09    | 15.35    | 58.46   | 0.00     | 0.00     | 83.91   | 58.88   | 1788.85  | 1982.07  | 1370.18  | 1284.15  | 1540.09  | 2395.97  | 1720.66  | 2247.36  | 2837.51  | 3044.65  | 1955.07  | 1524.07 | 1346.23  | 1414.11 | 681.27   |
| ENSMUSG00000041952 | Phn32   | 2047.48  | 1200.44 | 2132.93  | 1219.76  | 1271.85  | 1483.09 | 1803.67  | 1508.38  | 1657.70 | 1546.20 | 2734.98  | 3052.93  | 3192.45  | 2401.26  | 3294.02  | 2923.80  | 1828.97  | 2923.93  | 3050.53  | 2471.28  | 2382.70  | 2546.99 | 2710.74  | 2114.84 | 2099.75  |
| ENSMUSG00000047657 | Lm      | 1109.25  | 554.55  | 956.91   | 734.48   | 834.19   | 467.64  | 417.71   | 695.52   | 686.21  | 365.93  | 2313.33  | 2294.71  | 2450.56  | 2463.90  | 6994.89  | 2909.66  | 2117.10  | 2155.90  | 2462.22  | 2000.39  | 1388.41  | 1852.41 | 1743.92  | 1019.08 | 1148.88  |
| ENSMUSG00000026668 | Utna    | 367.26   | 523.38  | 16.40    | 21.40    | 67.52    | 93.27   | 14.21    | 26.48    | 0.00    | 191.50  | 577.38   | 1053.65  | 1312.22  | 1380.72  | 3116.10  | 1553.33  | 1660.47  | 1499.33  | 1123.68  | 1791.57  | 737.73   | 823.39  | 1100.83  | 737.35  | 360.21   |

Supplementary Table 2 - Normalized counts of the top 200 upregulated genes of nTEC in across nTEC<sup>hi</sup>, nTEC<sup>int</sup>, nTEC<sup>mid</sup>, nTEC<sup>low</sup> and nTEC<sup>0</sup>.

| geneID            | nTEC <sup>hi</sup> | nTEC <sup>int</sup> | nTEC <sup>mid</sup> | nTEC <sup>low</sup> | nTEC <sup>0</sup> |        |         |         |         |         |         |         |         |         |         |          |          |          |          |          |          |          |          |          |          |          |          |         |
|-------------------|--------------------|---------------------|---------------------|---------------------|-------------------|--------|---------|---------|---------|---------|---------|---------|---------|---------|---------|----------|----------|----------|----------|----------|----------|----------|----------|----------|----------|----------|----------|---------|
| ENMISG00000209215 | Fabp4              | 2384.75             | 2822.17             | 116.26              | 53.15             | 58.31  | 478.15  | 867.38  | 536.66  | 980.39  | 1476.10 | 871.85  | 714.86  | 876.98  | 9909.09 | 871.60   | 11176.79 | 13224.71 | 15047.66 | 14476.61 | 19897.94 | 14681.33 | 15322.80 | 11889.84 | 14534.98 | 15613.36 |          |         |
| ENMISG00000209216 | Sox1               | 923.0               | 459.80              | 0.00                | 0.00              | 0.00   | 62.13   | 49.39   | 19.19   | 0.00    | 0.00    | 0.00    | 0.00    | 0.00    | 0.00    | 0.00     | 0.00     | 0.00     | 0.00     | 0.00     | 0.00     | 0.00     | 0.00     | 0.00     | 0.00     | 0.00     | 0.00     |         |
| ENMISG00000209217 | Gap2               | 3016.56             | 1512.11             | 77.22               | 54.98             | 917.06 | 2114.89 | 1450.61 | 1906.23 | 1444.95 | 3625.19 | 679.07  | 7733.49 | 8663.80 | 5473.30 | 14317.87 | 9322.79  | 9561.20  | 8227.26  | 1057.82  | 11890.39 | 20063.92 | 19037.31 | 6832.67  | 17911.16 | 17591.18 | 15711.36 |         |
| ENMISG00000209218 | Ry2                | 1291.48             | 330.48              | 42.48               | 28.99             | 39.29  | 114.48  | 134.26  | 46.68   | 1462.58 | 1481.50 | 1349.66 | 6627.28 | 5843.89 | 897.20  | 2001.26  | 1662.66  | 4209.99  | 3262.16  | 4599.80  | 6480.02  | 11063.73 | 10307.93 | 10382.57 | 10088.12 | 11233.16 | 10119.48 |         |
| ENMISG00000209219 | Sox2               | 5456.23             | 2696.57             | 148.64              | 96.96             | 249.91 | 616.85  | 528.47  | 426.68  | 219.84  | 547.48  | 374.93  | 927.60  | 927.60  | 495.10  | 556.12   | 2465.90  | 1745.90  | 1745.90  | 3802.57  | 5107.86  | 6020.45  | 5016.55  | 7412.18  | 5693.50  | 6491.18  | 5693.50  |         |
| ENMISG00000209220 | Sox2               | 61.28               | 72.13               | 11.65               | 16.72             | 102.51 | 33.47   | 49.17   | 42.61   | 46.11   | 794.43  | 162.17  | 1328.08 | 1231.88 | 1258.62 | 1268.07  | 1633.20  | 1624.44  | 1041.15  | 1564.49  | 2155.67  | 4113.29  | 3191.16  | 2328.21  | 3917.13  | 3874.24  | 3874.24  |         |
| ENMISG00000209221 | Pgcp1              | 17898.91            | 4711.80             | 239.23              | 102.16            | 81.03  | 0.00    | 139.95  | 39.36   | 52.61   | 360.24  | 516.29  | 598.62  | 640.75  | 6040.03 | 6446.26  | 9171.59  | 5432.85  | 5179.80  | 6344.21  | 8008.93  | 7502.73  | 5966.80  | 5890.20  | 5891.73  | 5814.88  | 5814.88  |         |
| ENMISG00000209222 | Pgcp2              | 1262.21             | 236.79              | 18.92               | 12.47             | 19.87  | 0.00    | 0.00    | 0.00    | 0.00    | 0.00    | 0.00    | 0.00    | 0.00    | 0.00    | 0.00     | 0.00     | 0.00     | 0.00     | 0.00     | 0.00     | 0.00     | 0.00     | 0.00     | 0.00     | 0.00     | 0.00     |         |
| ENMISG00000209223 | Lgcl               | 1150.1              | 1492.76             | 95.39               | 113.21            | 114.17 | 58.21   | 266.39  | 522.63  | 379.53  | 1675.13 | 2455.39 | 1975.89 | 1866.32 | 3484.24 | 3723.30  | 3950.31  | 3424.12  | 3900.22  | 476.92   | 4362.82  | 6153.33  | 6594.74  | 6278.52  | 5740.14  | 5154.34  | 4914.34  |         |
| ENMISG00000209224 | Cy5d               | 483.14              | 487.62              | 0.00                | 0.00              | 0.00   | 0.00    | 39.90   | 30.17   | 80.27   | 58.88   | 35.22   | 38.11   | 11.19   | 102.91  | 100.62   | 126.90   | 2200.40  | 1438.53  | 3080.91  | 2962.07  | 3009.27  | 2504.20  | 2504.20  | 2504.20  | 2504.20  |          |         |
| ENMISG00000209225 | Lgcl               | 1656.1              | 802.23              | 10.10               | 46.94             | 0.00   | 0.00    | 27.73   | 13.13   | 23.23   | 0.00    | 0.00    | 0.00    | 0.00    | 0.00    | 0.00     | 0.00     | 0.00     | 0.00     | 0.00     | 0.00     | 0.00     | 0.00     | 0.00     | 0.00     | 0.00     | 0.00     |         |
| ENMISG00000209226 | Aspr1              | 1620.73             | 607.05              | 98.37               | 28.62             | 13.62  | 16.20   | 371.53  | 100.89  | 320.49  | 311.90  | 234.67  | 2053.19 | 2033.83 | 2487.39 | 2453.80  | 2474.20  | 4088.15  | 3070.30  | 3285.87  | 5190.11  | 7085.61  | 6271.46  | 4733.14  | 6620.09  | 5565.41  |          |         |
| ENMISG00000209227 | Sox2               | 4028.56             | 2258.12             | 51.68               | 29.84             | 20.00  | 0.00    | 0.00    | 0.00    | 0.00    | 0.00    | 0.00    | 0.00    | 0.00    | 0.00    | 0.00     | 0.00     | 0.00     | 0.00     | 0.00     | 0.00     | 0.00     | 0.00     | 0.00     | 0.00     | 0.00     | 0.00     |         |
| ENMISG00000209228 | Ly6c               | 126.75              | 242.88              | 13.02               | 63.51             | 39.90  | 0.00    | 14.50   | 39.36   | 39.60   | 0.00    | 0.00    | 0.00    | 0.00    | 0.00    | 0.00     | 0.00     | 0.00     | 0.00     | 0.00     | 0.00     | 0.00     | 0.00     | 0.00     | 0.00     | 0.00     | 0.00     |         |
| ENMISG00000209229 | Ngp                | 617.70              | 607.21              | 174.39              | 134.61            | 11.05  | 80.79   | 0.00    | 0.00    | 0.00    | 64.14   | 95.37   | 46.45   | 79.36   | 70.29   | 63.23    | 281.89   | 85.24    | 1340.31  | 1133.55  | 1040.93  | 1165.84  | 1953.20  | 1728.55  | 1507.15  | 1274.13  | 2256.81  |         |
| ENMISG00000209230 | Sox2               | 1232.36             | 1005.61             | 21.00               | 14.72             | 80.98  | 0.00    | 0.00    | 0.00    | 0.00    | 0.00    | 0.00    | 0.00    | 0.00    | 0.00    | 0.00     | 0.00     | 0.00     | 0.00     | 0.00     | 0.00     | 0.00     | 0.00     | 0.00     | 0.00     | 0.00     | 0.00     |         |
| ENMISG00000209231 | Upk3               | 871.57              | 437.40              | 57.38               | 104.05            | 36.85  | 21.951  | 298.19  | 68.39   | 114.27  | 186.11  | 74.81   | 187.23  | 167.23  | 733.22  | 2797.16  | 1374.24  | 1517.28  | 1535.26  | 2314.22  | 1939.59  | 1669.01  | 1679.74  | 1674.10  | 1845.91  | 1638.86  |          |         |
| ENMISG00000209232 | Zfp300             | 26.36               | 318.11              | 137.13              | 85.60             | 76.11  | 250.90  | 228.03  | 143.83  | 135.45  | 110.42  | 169.80  | 90.01   | 194.75  | 33.27   | 77.57    | 127.89   | 456.86   | 913.69   | 950.50   | 510.66   | 317.60   | 404.08   | 1999.02  | 1028.18  | 899.37   | 1131.29  |         |
| ENMISG00000209233 | Sox2               | 2259.92             | 396.72              | 0.00                | 0.00              | 0.00   | 0.00    | 0.00    | 0.00    | 0.00    | 0.00    | 0.00    | 0.00    | 0.00    | 0.00    | 0.00     | 0.00     | 0.00     | 0.00     | 0.00     | 0.00     | 0.00     | 0.00     | 0.00     | 0.00     | 0.00     | 0.00     |         |
| ENMISG00000209234 | Dapl1              | 86.45               | 309.89              | 112.53              | 95.95             | 0.00   | 52.81   | 51.06   | 467.24  | 1668.68 | 1074.09 | 18.90   | 26.24   | 134.74  | 48.60   | 126.40   | 14.91    | 54.81    | 71.14    | 611.72   | 1039.87  | 1023.51  | 1418.49  | 2013.60  | 3884.85  | 1223.66  | 240.17   | 2659.09 |
| ENMISG00000209235 | Fxy3               | 401.83              | 513.81              | 235.50              | 256.10            | 573.32 | 481.43  | 524.27  | 674.05  | 606.48  | 90.01   | 194.75  | 33.27   | 77.57   | 127.89  | 456.86   | 913.69   | 950.50   | 510.66   | 317.60   | 404.08   | 1999.02  | 1028.18  | 899.37   | 1131.29  | 899.37   |          |         |
| ENMISG00000209236 | Sox2               | 1232.36             | 1005.61             | 21.00               | 14.72             | 80.98  | 0.00    | 0.00    | 0.00    | 0.00    | 0.00    | 0.00    | 0.00    | 0.00    | 0.00    | 0.00     | 0.00     | 0.00     | 0.00     | 0.00     | 0.00     | 0.00     | 0.00     | 0.00     | 0.00     | 0.00     | 0.00     |         |
| ENMISG00000209237 | Prnp1              | 9.34                | 202.10              | 96.10               | 218.13            | 264.56 | 159.00  | 226.61  | 211.12  | 389.44  | 65.41   | 266.64  | 65.41   | 266.64  | 65.41   | 266.64   | 65.41    | 266.64   | 65.41    | 266.64   | 65.41    | 266.64   | 65.41    | 266.64   | 65.41    | 266.64   | 65.41    | 266.64  |
| ENMISG00000209238 | Sox2               | 1232.36             | 1005.61             | 21.00               | 14.72             | 80.98  | 0.00    | 0.00    | 0.00    | 0.00    | 0.00    | 0.00    | 0.00    | 0.00    | 0.00    | 0.00     | 0.00     | 0.00     | 0.00     | 0.00     | 0.00     | 0.00     | 0.00     | 0.00     | 0.00     | 0.00     | 0.00     |         |
| ENMISG00000209239 | Prnp1              | 9.34                | 202.10              | 96.10               | 218.13            | 264.56 | 159.00  | 226.61  | 211.12  | 389.44  | 65.41   | 266.64  | 65.41   | 266.64  | 65.41   | 266.64   | 65.41    | 266.64   | 65.41    | 266.64   | 65.41    | 266.64   | 65.41    | 266.64   | 65.41    | 266.64   | 65.41    | 266.64  |
| ENMISG00000209240 | Bcl2               | 221.88              | 436.33              | 482.18              | 559.14            | 387.64 | 1559.24 | 779.29  | 2277.90 | 456.86  | 1403.26 | 836.38  | 1106.99 | 958.43  | 793.93  | 1637.78  | 1132.74  | 1146.76  | 1079.19  | 940.10   | 1860.00  | 3332.31  | 3462.26  | 2978.56  | 3400.40  | 4420.30  | 3100.97  |         |
| ENMISG00000209241 | Rpn2               | 221.88              | 436.33              | 482.18              | 559.14            | 387.64 | 1559.24 | 779.29  | 2277.90 | 456.86  | 1403.26 | 836.38  | 1106.99 | 958.43  | 793.93  | 1637.78  | 1132.74  | 1146.76  | 1079.19  | 940.10   | 1860.00  | 3332.31  | 3462.26  | 2978.56  | 3400.40  | 4420.30  | 3100.97  |         |
| ENMISG00000209242 | Lgcl               | 1150.1              | 1492.76             | 95.39               | 113.21            | 114.17 | 58.21   | 266.39  | 522.63  | 379.53  | 1675.13 | 2455.39 | 1975.89 | 1866.32 | 3484.24 | 3723.30  | 3950.31  | 3424.12  | 3900.22  | 476.92   | 4362.82  | 6153.33  | 6594.74  | 6278.52  | 5740.14  | 5154.34  | 4914.34  |         |
| ENMISG00000209243 | Cy5d               | 483.14              | 487.62              | 0.00                | 0.00              | 0.00   | 0.00    | 39.90   | 30.17   | 80.27   | 58.88   | 35.22   | 38.11   | 11.19   | 102.91  | 100.62   | 126.90   | 2200.40  | 1438.53  | 3080.91  | 2962.07  | 3009.27  | 2504.20  | 2504.20  | 2504.20  | 2504.20  |          |         |
| ENMISG00000209244 | Ly6c               | 126.75              | 242.88              | 13.02               | 63.51             | 39.90  | 0.00    | 14.50   | 39.36   | 39.60   | 0.00    | 0.00    | 0.00    | 0.00    | 0.00    | 0.00     | 0.00     | 0.00     | 0.00     | 0.00     | 0.00     | 0.00     | 0.00     | 0.00     | 0.00     | 0.00     | 0.00     |         |
| ENMISG00000209245 | Aspr1              | 1620.73             | 607.05              | 98.37               | 28.62             | 13.62  | 16.20   | 371.53  | 100.89  | 320.49  | 311.90  | 234.67  | 2053.19 | 2033.83 | 2487.39 | 2453.80  | 2474.20  | 4088.15  | 3070.30  | 3285.87  | 5190.11  | 7085.61  | 6271.46  | 4733.14  | 6620.09  | 5565.41  |          |         |
| ENMISG00000209246 | Sox2               | 4028.56             | 2258.12             | 51.68               | 29.84             | 20.00  | 0.00    | 0.00    | 0.00    | 0.00    | 0.00    | 0.00    | 0.00    | 0.00    | 0.00    | 0.00     | 0.00     | 0.00     | 0.00     | 0.00     | 0.00     | 0.00     | 0.00     | 0.00     | 0.00     | 0.00     | 0.00     |         |
| ENMISG00000209247 | Lgcl               | 126.75              | 242.88              | 13.02               | 63.51             | 39.90  | 0.00    | 14.50   | 39.36   | 39.60   | 0.00    | 0.00    | 0.00    | 0.00    | 0.00    | 0.00     | 0.00     | 0.00     | 0.00     | 0.00     | 0.00     | 0.00     | 0.00     | 0.00     | 0.00     | 0.00     | 0.00     |         |
| ENMISG00000209248 | Ngp                | 617.70              | 607.21              | 174.39              | 134.61            | 11.05  | 80.79   | 0.00    | 0.00    | 0.00    | 64.14   | 95.37   | 46.45   | 79.36   | 70.29   | 63.23    | 281.89   | 85.24    | 1340.31  | 1133.55  | 1040.93  | 1165.84  | 1953.20  | 1728.55  | 1507.15  | 1274.13  | 2256.81  |         |
| ENMISG00000209249 | Sox2               | 1232.36             | 1005.61             | 21.00               | 14.72             | 80.98  | 0.00    | 0.00    | 0.00    | 0.00    | 0.00    | 0.00    | 0.00    | 0.00    | 0.00    | 0.00     | 0.00     | 0.00     | 0.00     | 0.00     | 0.00     | 0.00     | 0.00     | 0.00     | 0.00     | 0.00     | 0.00     |         |
| ENMISG00000209250 | Upk3               | 871.57              | 437.40              | 57.38               | 104.05            | 36.85  | 21.951  | 298.19  | 68.39   | 114.27  | 186.11  | 74.81   | 187.23  | 167.23  | 733.22  | 2797.16  | 1374.24  | 1517.28  | 1535.26  | 2314.22  | 1939.59  | 1669.01  | 1679.74  | 1674.10  | 1845.91  | 1638.86  |          |         |
| ENMISG00000209251 | Zfp300             | 26.36               | 318.11              | 137.13              | 85.60             |        |         |         |         |         |         |         |         |         |         |          |          |          |          |          |          |          |          |          |          |          |          |         |

|                     |          |         |         |         |         |         |         |         |         |         |         |         |         |         |         |         |         |         |         |         |         |         |         |         |         |         |
|---------------------|----------|---------|---------|---------|---------|---------|---------|---------|---------|---------|---------|---------|---------|---------|---------|---------|---------|---------|---------|---------|---------|---------|---------|---------|---------|---------|
| ENSMUSG00000003236  | Scgs     | 534.53  | 1590.56 | 806.37  | 1443.42 | 968.62  | 1338.58 | 1437.11 | 1061.16 | 1726.01 | 2130.18 | 213.08  | 256.65  | 146.06  | 284.50  | 403.70  | 247.89  | 592.58  | 787.23  | 428.76  | 666.95  | 848.47  | 546.67  | 596.10  | 1126.23 | 1077.28 |
| ENSMUSG00000003354  | Secm7b   | 42.99   | 0.00    | 0.00    | 117.74  | 74.88   | 72.90   | 56.83   | 25.04   | 0.00    | 0.00    | 81.72   | 126.01  | 23.18   | 78.30   | 137.82  | 158.39  | 59.15   | 308.74  | 193.90  | 229.33  | 355.12  | 232.56  | 487.31  | 763.87  | 821.11  |
| ENSMUSG00000003385  | Trpsa2   | 1454.08 | 185.92  | 73.04   | 142.89  | 149.77  | 40.06   | 109.40  | 274.06  | 171.32  | 326.12  | 927.17  | 1214.45 | 774.35  | 921.35  | 2068.78 | 2222.54 | 2840.44 | 2295.27 | 2804.99 | 3165.45 | 2588.18 | 2581.87 | 1164.38 | 2905.23 | 3278.84 |
| ENSMUSG00000003830  | AUS04120 | 2548.37 | 1849.49 | 1306.44 | 1381.98 | 1444.95 | 1338.21 | 2283.18 | 1202.84 | 1475.44 | 2028.74 | 4170.72 | 4499.09 | 3987.86 | 4327.48 | 7237.85 | 6010.66 | 4946.13 | 4748.42 | 4200.87 | 5342.39 | 4323.31 | 5299.13 | 2484.48 | 3840.81 | 2926.46 |
| ENSMUSG00000004241  | Phsp1    | 1159.71 | 487.92  | 661.04  | 974.70  | 688.87  | 518.87  | 728.15  | 293.38  | 428.88  | 179.17  | 4198.98 | 2955.36 | 2905.89 | 3199.94 | 3088.80 | 3410.16 | 2593.88 | 2651.32 | 3091.45 | 3958.22 | 4695.99 | 5271.21 | 5248.31 | 3169.11 | 4122.32 |
| ENSMUSG00000003450  | Dcur     | 748.53  | 861.91  | 669.24  | 764.16  | 718.18  | 553.68  | 648.58  | 727.00  | 888.06  | 513.82  | 1852.04 | 1596.33 | 1690.12 | 1508.62 | 2870.17 | 1394.04 | 1684.34 | 1205.34 | 1822.22 | 1353.46 | 1934.45 | 2548.02 | 2344.38 | 1455.77 | 1408.41 |
| ENSMUSG00000002567  | Gpnc2    | 827.96  | 1134.89 | 1342.21 | 1062.39 | 1103.05 | 1430.31 | 1280.12 | 923.06  | 1271.49 | 2858.25 | 468.93  | 762.99  | 730.30  | 1101.45 | 334.74  | 1126.35 | 1200.73 | 1229.30 | 855.73  | 934.07  | 597.98  | 1253.28 | 956.97  | 1184.31 | 1246.20 |
| ENSMUSG00000002062  | Plnc3b   | 1641.91 | 1595.94 | 1156.09 | 784.53  | 933.92  | 1173.95 | 720.33  | 995.76  | 1019.76 | 134.80  | 1251.75 | 1740.11 | 1766.63 | 1902.74 | 2279.63 | 2032.14 | 1874.26 | 1555.95 | 1719.85 | 1901.31 | 1606.06 | 1384.44 | 1469.82 | 1321.94 | 1981.17 |
| ENSMUSG000000025207 | Samu4g   | 1002.72 | 149.38  | 209.42  | 35.90   | 179.85  | 183.25  | 95.90   | 165.29  | 134.03  | 157.37  | 886.69  | 461.50  | 282.85  | 595.09  | 774.36  | 811.54  | 1141.57 | 712.10  | 1173.06 | 1232.66 | 2110.10 | 1183.04 | 971.17  | 1661.57 | 1307.73 |
| ENSMUSG000000070284 | Gmpb     | 583.50  | 510.48  | 489.63  | 593.66  | 505.88  | 764.31  | 607.38  | 344.18  | 668.96  | 613.36  | 927.17  | 1179.89 | 595.15  | 1492.96 | 1530.03 | 849.24  | 560.41  | 1085.57 | 970.73  | 1048.91 | 1043.21 | 1012.10 | 630.04  | 1160.37 | 1002.33 |
| ENSMUSG00000002415  | Toth     | 1882.08 | 1171.43 | 509.76  | 524.63  | 565.34  | 399.99  | 592.46  | 571.01  | 603.70  | 692.99  | 357.23  | 4325.93 | 3855.51 | 4118.68 | 2895.16 | 6140.73 | 6982.28 | 4513.29 | 9769.33 | 7294.74 | 4378.29 | 5988.64 | 3359.61 | 4770.68 | 4727.52 |
| ENSMUSG00000003820  | Amth2    | 328.01  | 214.94  | 388.04  | 211.23  | 333.31  | 434.80  | 260.71  | 385.65  | 515.12  | 211.41  | 480.39  | 320.81  | 558.74  | 86.13   | 698.21  | 233.75  | 634.09  | 437.71  | 479.34  | 393.87  | 383.38  | 273.33  | 930.27  | 609.83  | 517.95  |
| ENSMUSG00000003281  | Appc3    | 95.06   | 0.00    | 0.00    | 0.00    | 0.00    | 0.00    | 0.00    | 0.00    | 0.00    | 0.00    | 365.83  | 103.59  | 39.41   | 96.37   | 304.87  | 197.94  | 147.37  | 19.60   | 210.77  | 186.74  | 210.62  | 198.87  | 163.60  | 88.18   | 83.97   |
| ENSMUSG000000047180 | Neu43    | 235.12  | 0.00    | 31.30   | 138.06  | 103.74  | 7.88    | 80.98   | 79.43   | 0.00    | 182.02  | 445.25  | 385.52  | 271.25  | 334.09  | 851.93  | 522.17  | 816.74  | 620.64  | 414.31  | 813.27  | 844.65  | 1168.97 | 1019.90 | 883.82  | 517.95  |
| ENSMUSG000000034499 | Ea1      | 3874.43 | 2498.69 | 4183.87 | 4711.29 | 4571.80 | 2826.20 | 4103.19 | 4002.80 | 3429.88 | 3154.98 | 4986.39 | 4570.99 | 5594.32 | 4596.32 | 1719.67 | 4143.46 | 3884.46 | 3075.97 | 3426.45 | 4091.01 | 4354.62 | 3881.97 | 3714.98 | 4439.28 | 4525.04 |





|                    |        |         |         |         |         |         |         |         |         |         |         |         |         |         |         |         |         |         |         |         |         |         |         |         |         |         |
|--------------------|--------|---------|---------|---------|---------|---------|---------|---------|---------|---------|---------|---------|---------|---------|---------|---------|---------|---------|---------|---------|---------|---------|---------|---------|---------|---------|
| ENMISG00000028161  | Pajka  | 2301.67 | 2468.60 | 3054.81 | 3127.75 | 2455.32 | 2614.71 | 3330.29 | 2355.60 | 3597.70 | 4086.87 | 4056.93 | 4018.26 | 4149.95 | 4144.78 | 4715.09 | 3844.67 | 2915.16 | 3157.63 | 3481.85 | 5312.81 | 3451.93 | 3961.23 | 3732.38 | 3225.93 | 3087.55 |
| ENMISG00000030560  | Cluc   | 2823.12 | 2915.72 | 2705.07 | 1984.61 | 2208.36 | 2051.00 | 1654.11 | 2434.31 | 2182.86 | 2227.82 | 4089.00 | 5303.83 | 4606.68 | 5074.27 | 6020.18 | 4907.87 | 4417.89 | 4279.13 | 5656.16 | 5847.70 | 4834.99 | 4565.44 | 3797.21 | 3133.76 | 3095.23 |
| ENMISG000000044139 | Pris53 | 0.00    | 0.00    | 0.00    | 0.00    | 35.60   | 47.95   | 0.00    | 0.00    | 0.00    | 0.00    | 0.00    | 3.87    | 0.00    | 0.00    | 0.00    | 138.56  | 48.78   | 113.24  | 39.74   | 61.25   | 43.53   | 0.00    | 36.55   | 15.15   | 0.00    |
| ENMISG000000058447 | Gdat   | 4315.51 | 4761.42 | 2852.84 | 3481.85 | 2184.62 | 3710.25 | 3280.57 | 3197.09 | 6239.74 | 5972.46 | 4043.94 | 2950.60 | 3375.60 | 3105.97 | 5506.69 | 4331.03 | 4629.60 | 4112.54 | 4528.46 | 5372.16 | 4427.94 | 5572.47 | 4055.23 | 5913.99 | 6667.31 |
| ENMISG000000029281 | Shrom3 | 1339.13 | 1048.91 | 610.31  | 836.64  | 854.45  | 725.11  | 910.01  | 897.50  | 802.99  | 626.63  | 1071.51 | 1481.02 | 881.00  | 846.91  | 971.18  | 1622.13 | 1360.55 | 1106.26 | 993.81  | 1565.70 | 1318.91 | 1574.85 | 908.14  | 1462.27 | 1315.66 |
| ENMISG000000018398 | Rep-08 | 3878.16 | 3357.94 | 2959.42 | 2758.44 | 2940.24 | 2702.73 | 2362.04 | 3037.52 | 1723.68 | 1990.82 | 3315.35 | 3750.79 | 3389.51 | 2962.42 | 2584.54 | 3201.85 | 3009.60 | 2883.24 | 3251.82 | 2878.76 | 2772.23 | 2710.49 | 2659.40 | 3162.80 | 3034.97 |
| ENMISG000000033206 | Kolna  | 3680.35 | 3262.15 | 3896.95 | 4140.42 | 4484.64 | 3783.18 | 3151.27 | 3102.63 | 4763.70 | 3772.13 | 2218.63 | 2433.53 | 2765.86 | 1884.91 | 2777.55 | 2277.21 | 3728.79 | 3955.75 | 2992.88 | 2422.79 | 3045.10 | 3440.60 | 3386.63 | 4100.00 | 3322.47 |
| ENMISG000000033740 | St18   | 231.76  | 0.00    | 23.85   | 128.40  | 217.30  | 26.93   | 0.00    | 0.00    | 101.39  | 137.46  | 90.88   | 312.66  | 44.05   | 305.38  | 0.00    | 307.27  | 203.41  | 228.66  | 572.08  | 564.01  | 122.19  | 389.27  | 16.53   | 265.14  | 24.61   |



|                   |            |         |         |          |          |          |          |          |          |          |          |          |          |          |         |          |          |          |          |         |         |          |          |         |         |         |        |
|-------------------|------------|---------|---------|----------|----------|----------|----------|----------|----------|----------|----------|----------|----------|----------|---------|----------|----------|----------|----------|---------|---------|----------|----------|---------|---------|---------|--------|
| ENMISG00000008540 | Mao2nd261  | 0.00    | 162.28  | 0.00     | 0.00     | 0.00     | 0.00     | 22.18    | 0.00     | 0.00     | 0.00     | 0.00     | 0.00     | 28.98    | 0.00    | 0.00     | 0.00     | 0.00     | 0.00     | 0.00    | 0.00    | 0.00     | 0.00     | 67.12   |         |         |        |
| ENMISG00000008290 |            | 180.3   | 182.38  | 31.26    | 568.41   | 1017.38  | 768.4    | 120.72   | 134.92   | 112.86   | 79.34    | 122.86   | 116.26   | 374.96   | 171.34  | 144.82   | 36.94    | 278.19   | 278.19   | 278.19  | 278.19  | 278.19   | 278.19   | 278.19  |         |         |        |
| ENMISG00000008306 | Gas6a      | 20.56   | 0.00    | 0.00     | 0.00     | 0.00     | 0.00     | 10.73    | 10.72    | 15.73    | 102.77   | 71.89    | 30.14    | 229.69   | 0.00    | 13.84    | 179.54   | 68.60    | 75.88    | 83.58   | 44.20   | 111.70   | 74.82    | 172.98  |         |         |        |
| ENMISG00000008319 | Ch3        | 3820.75 | 4903.89 | 52976.61 | 62518.67 | 57428.64 | 68862.03 | 56917.38 | 61272.00 | 77268.52 | 70683.58 | 117423.3 | 100317.1 | 11504.74 | 9002.23 | 12086.76 | 13444.49 | 12586.96 | 11952.13 | 5954.24 | 21032.1 | 23985.72 | 21202.82 | 5729.94 | 3730.21 |         |        |
| ENMISG00000008387 | Ch1        | 209.12  | 27.11   | 111.14   | 149.70   | 130.29   | 103.45   | 134.16   | 130.71   | 134.16   | 130.71   | 134.16   | 130.71   | 134.16   | 130.71  | 134.16   | 130.71   | 134.16   | 130.71   | 134.16  | 130.71  | 134.16   | 130.71   | 134.16  | 130.71  |         |        |
| ENMISG00000008380 | C130002008 | 12.15   | 21.15   | 105.48   | 43.20    | 0.00     | 105.85   | 0.00     | 37.82    | 70.28    | 0.00     | 20.87    | 0.00     | 0.00     | 15.08   | 87.08    | 52.26    | 0.00     | 6.92     | 48.50   | 25.84   | 0.00     | 68.12    | 0.00    |         |         |        |
| ENMISG00000008337 | Paired     | 20.97   | 20.27   | 30.27    | 34.57    | 50.37    | 165.52   | 55.81    | 252.30   | 37.27    | 59.47    | 40.47    | 0.00     | 0.00     | 15.08   | 87.08    | 52.26    | 0.00     | 28.92    | 93.44   | 42.83   | 0.00     | 174.45   | 209.19  |         |         |        |
| ENMISG00000008290 | Gas6b      | 122.86  | 122.86  | 122.86   | 122.86   | 122.86   | 122.86   | 122.86   | 122.86   | 122.86   | 122.86   | 122.86   | 122.86   | 122.86   | 122.86  | 122.86   | 122.86   | 122.86   | 122.86   | 122.86  | 122.86  | 122.86   | 122.86   | 122.86  | 122.86  |         |        |
| ENMISG00000008580 | Grb1       | 2.98    | 78.28   | 207.18   | 203.64   | 248.60   | 541.86   | 373.66   | 254.35   | 303.13   | 200.98   | 0.00     | 52.57    | 303.17   | 15.66   | 185.33   | 270.51   | 225.20   | 11.98    | 118.03  | 61.60   | 0.00     | 116.78   | 302.84  | 205.80  | 44.47   |        |
| ENMISG00000008572 | Ch9b5      | 33.64   | 0.00    | 0.00     | 0.00     | 0.00     | 0.00     | 0.00     | 0.00     | 0.00     | 0.00     | 0.00     | 0.00     | 0.29     | 22.22   | 0.00     | 22.87    | 0.00     | 0.91     | 0.00    | 0.00    | 0.00     | 0.00     | 0.00    | 87.12   | 13.42   |        |
| ENMISG00000008287 | Gas1       | 162.28  | 204.17  | 274.14   | 339.9    | 550.69   | 406.8    | 569.69   | 453.9    | 583.37   | 733.16   | 316.31   | 15.13    | 32.12    | 159.62  | 47.43    | 47.43    | 47.43    | 47.43    | 47.43   | 47.43   | 47.43    | 47.43    | 47.43   | 47.43   | 47.43   |        |
| ENMISG00000008258 | Gm26G02    | 33.31   | 33.31   | 746.73   | 71.03    | 538.97   | 81.34    | 583.23   | 113.5    | 60.87    | 188.44   | 41.70    | 10.92    | 0.00     | 87.56   | 31.1     | 119.77   | 137.10   | 20.74    | 205.4   | 42.02   | 0.00     | 34.8     | 51.51   | 0.00    | 0.00    |        |
| ENMISG00000008573 | B43D19W020 | 0.00    | 0.00    | 0.00     | 0.00     | 0.00     | 0.00     | 0.00     | 0.00     | 0.00     | 0.00     | 0.00     | 0.00     | 0.00     | 0.00    | 0.00     | 0.00     | 0.00     | 0.00     | 0.00    | 0.00    | 0.00     | 0.00     | 0.00    | 0.00    | 0.00    |        |
| ENMISG00000008570 | Gm26G01    | 33.31   | 33.31   | 746.73   | 71.03    | 538.97   | 81.34    | 583.23   | 113.5    | 60.87    | 188.44   | 41.70    | 10.92    | 0.00     | 87.56   | 31.1     | 119.77   | 137.10   | 20.74    | 205.4   | 42.02   | 0.00     | 34.8     | 51.51   | 0.00    | 0.00    |        |
| ENMISG00000008569 | Gas1b      | 162.28  | 204.17  | 274.14   | 339.9    | 550.69   | 406.8    | 569.69   | 453.9    | 583.37   | 733.16   | 316.31   | 15.13    | 32.12    | 159.62  | 47.43    | 47.43    | 47.43    | 47.43    | 47.43   | 47.43   | 47.43    | 47.43    | 47.43   | 47.43   | 47.43   |        |
| ENMISG00000008568 | Gas1a      | 162.28  | 204.17  | 274.14   | 339.9    | 550.69   | 406.8    | 569.69   | 453.9    | 583.37   | 733.16   | 316.31   | 15.13    | 32.12    | 159.62  | 47.43    | 47.43    | 47.43    | 47.43    | 47.43   | 47.43   | 47.43    | 47.43    | 47.43   | 47.43   | 47.43   |        |
| ENMISG00000008567 | Fst1       | 5104.22 | 6568.92 | 4399.25  | 604.88   | 5059.79  | 6253.79  | 5565.56  | 853.76   | 10071.65 | 13427.77 | 11608.97 | 1588.21  | 2035.74  | 1999.15 | 1183.21  | 2168.61  | 3933.83  | 422.80   | 420.80  | 366.42  | 502.99   | 349.43   | 444.3   | 40.08   | 592.39  |        |
| ENMISG00000008349 | Pyg1       | 193.38  | 29.19   | 1000.14  | 1179.03  | 1332.62  | 1029.86  | 1241.05  | 1320.91  | 1674.73  | 1134.77  | 93.94    | 337.05   | 85.78    | 496.76  | 395.08   | 204.33   | 439.91   | 304.87   | 198.72  | 253.1   | 476.25   | 358.88   | 825.84  | 287.87  | 387.68  |        |
| ENMISG00000008581 | Pyg2       | 65.39   | 63.18   | 114.14   | 145.89   | 148.19   | 152.69   | 145.27   | 141.77   | 145.89   | 148.19   | 152.69   | 145.27   | 141.77   | 145.89  | 148.19   | 152.69   | 145.27   | 141.77   | 145.89  | 148.19  | 152.69   | 145.27   | 141.77  | 145.89  | 148.19  | 152.69 |
| ENMISG00000008496 | Ln04       | 199.98  | 297.93  | 157.99   | 311.23   | 115.40   | 471.18   | 423.99   | 374.1    | 867.97   | 1086.42  | 175.66   | 60.00    | 69.55    | 5.22    | 34.48    | 74.46    | 281.52   | 179.62   | 181.86  | 156.53  | 174.20   | 315.88   | 708.89  | 269.87  | 548.06  |        |
| ENMISG00000008298 | Trnc3      | 368.10  | 487.50  | 35.03    | 24.16    | 14.1     | 24.96    | 397.11   | 80.66    | 587.57   | 140.31   | 368.83   | 194.81   | 301.91   | 506.35  | 810.68   | 344.97   | 579.20   | 212.32   | 125.26  | 21.37   | 177.18   | 144.71   | 79.19   | 80.24   | 130.64  |        |
| ENMISG00000008478 | Ln03       | 199.98  | 297.93  | 157.99   | 311.23   | 115.40   | 471.18   | 423.99   | 374.1    | 867.97   | 1086.42  | 175.66   | 60.00    | 69.55    | 5.22    | 34.48    | 74.46    | 281.52   | 179.62   | 181.86  | 156.53  | 174.20   | 315.88   | 708.89  | 269.87  | 548.06  |        |
| ENMISG00000008297 | Trnc4      | 368.10  | 487.50  | 35.03    | 24.16    | 14.1     | 24.96    | 397.11   | 80.66    | 587.57   | 140.31   | 368.83   | 194.81   | 301.91   | 506.35  | 810.68   | 344.97   | 579.20   | 212.32   | 125.26  | 21.37   | 177.18   | 144.71   | 79.19   | 80.24   | 130.64  |        |
| ENMISG00000008479 | Ln05       | 199.98  | 297.93  | 157.99   | 311.23   | 115.40   | 471.18   | 423.99   | 374.1    | 867.97   | 1086.42  | 175.66   | 60.00    | 69.55    | 5.22    | 34.48    | 74.46    | 281.52   | 179.62   | 181.86  | 156.53  | 174.20   | 315.88   | 708.89  | 269.87  | 548.06  |        |
| ENMISG00000008220 | Soe3       | 688.17  | 1073.3  | 1069.29  | 1196.29  | 579.45   | 1548.76  | 1351.87  | 1305.17  | 2001.05  | 1883.89  | 332.99   | 237.39   | 376.26   | 151.38  | 79.27    | 385.00   | 596.50   | 20.10    | 259.94  | 41.29   | 387.61   | 886.01   | 499.05  | 762.61  | 315.88  |        |
| ENMISG00000008420 | Pha33      | 213.07  | 151.53  | 241.46   | 270.60   | 303.85   | 528.72   | 257.16   | 294.09   | 503.47   | 252.17   | 18.33    | 61.84    | 0.00     | 5.22    | 34.48    | 287.89   | 91.33    | 116.88   | 314.74  | 173.54  | 233.69   | 308.03   | 194.06  | 0.00    | 315.47  |        |
| ENMISG00000008244 | Gas9       | 23.19   | 63.18   | 1095.10  | 1005.10  | 789.98   | 985.36   | 1140.19  | 1503.23  | 1336.69  | 1336.69  | 1336.69  | 1336.69  | 1336.69  | 1336.69 | 1336.69  | 1336.69  | 1336.69  | 1336.69  | 1336.69 | 1336.69 | 1336.69  | 1336.69  | 1336.69 | 1336.69 | 1336.69 |        |
| ENMISG00000008307 | Phc0h3     | 77.56   | 0.00    | 0.00     | 0.00     | 85.94    | 214.12   | 162.68   | 192.48   | 182.97   | 0.00     | 0.00     | 19.33    | 78.83    | 0.00    | 0.00     | 67.48    | 96.82    | 0.00     | 93.58   | 20.62   | 0.00     | 0.00     | 0.00    | 0.00    | 24.73   | 10.00  |
| ENMISG00000008276 | Gm28G02    | 0.00    | 0.00    | 0.00     | 0.00     | 0.00     | 0.00     | 0.00     | 0.00     | 0.00     | 0.00     | 0.00     | 0.00     | 0.00     | 0.00    | 0.00     | 0.00     | 0.00     | 0.00     | 0.00    | 0.00    | 0.00     | 0.00     | 0.00    | 0.00    | 0.00    | 0.00   |
| ENMISG00000008274 | Mao2nd262  | 0.00    | 0.00    | 0.00     | 0.00     | 389.90   | 235.10   | 316.68   | 564.05   | 284.04   | 76.92    | 32.98    | 27.14    | 57.96    | 78.30   | 493.79   | 248.83   | 138.93   | 44.64    | 242.55  | 236.49  | 0.00     | 0.00     | 0.00    | 0.00    | 0.00    | 0.00   |
| ENMISG00000008244 | Bh6        | 394.36  | 451.38  | 1092.25  | 375.26   | 866.11   | 1740.32  | 1688.70  | 1651.49  | 2293.19  | 1297.06  | 374.71   | 241.96   | 338.49   | 206.19  | 186.03   | 284.65   | 95.48    | 71.22    | 134.89  | 136.96  | 132.00   | 699.28   | 799.28  | 368.88  | 419.00  |        |
| ENMISG00000008282 | Gas10      | 190.31  | 190.31  | 190.31   | 190.31   | 190.31   | 190.31   | 190.31   | 190.31   | 190.31   | 190.31   | 190.31   | 190.31   | 190.31   | 190.31  | 190.31   | 190.31   | 190.31   | 190.31   | 190.31  | 190.31  | 190.31   | 190.31   | 190.31  | 190.31  | 190.31  | 190.31 |
| ENMISG00000008292 | Gas11      | 343.14  | 326.25  | 373.03   | 175.24   | 364.45   | 447.65   | 428.24   | 361.94   | 294.33   | 67.66    | 37.65    | 23.05    | 229.60   | 75.17   | 592.87   | 67.65    | 67.50    | 67.50    | 67.50   | 67.50   | 67.50    | 67.50    | 67.50   | 67.50   | 67.50   | 67.50  |
| ENMISG00000008247 | B131014818 | 0.00    | 0.00    | 0.00     | 0.00     | 0.00     | 0.00     | 0.00     | 0.00     | 0.00     | 0.00     | 0.00     | 0.00     | 0.00     | 0.00    | 0.00     | 0.00     | 0.00     | 0.00     | 0.00    | 0.00    | 0.00     | 0.00     | 0.00    | 0.00    | 0.00    | 0.00   |
| ENMISG00000008293 | Adm3       | 31.7    | 0.00    | 0.00     | 0.00     | 0.00     | 0.00     | 0.00     | 0.00     | 0.00     | 0.00     | 0.00     | 0.00     | 0.00     | 0.00    | 0.00     | 0.00     | 0.00     | 0.00     | 0.00    | 0.00    | 0.00     | 0.00     | 0.00    | 0.00    | 0.00    | 0.00   |
| ENMISG00000008294 | Gm170107   | 19.45   | 19.45   | 19.45    | 19.45    | 19.45    | 19.45    | 19.45    | 19.45    | 19.45    | 19.45    | 19.45    | 19.45    | 19.45    | 19.45   | 19.45    | 19.45    | 19.45    | 19.45    | 19.45   | 19.45   | 19.45    | 19.45    | 19.45   | 19.45   | 19.45   | 19.45  |
| ENMISG00000008295 | Co46       | 6.00    | 0.00    | 0.00     | 0.00     | 0.00     | 0.00     | 0.00     | 0.00     | 0.00     | 0.00     | 0.00     | 0.00     | 0.00     | 0.00    | 0.00     | 0.00     | 0.00     | 0.00     | 0.00    | 0.00    | 0.00     | 0.00     | 0.00    | 0.00    | 0.00    | 0.00   |
| ENMISG00000008359 | Pym        | 393.24  | 376.15  | 603.79   | 509.83   | 806.95   | 1338.58  | 1067.00  | 973.15   | 940.51   | 865.10   | 200.86   | 187.08   | 238.80   | 660.35  | 306.01   | 251.66   | 494.74   | 20.32    | 203.54  | 237.34  | 520.84   | 606.47   | 267.16  | 421.71  | 341.20  |        |
| ENMISG00000008279 | Grb2       | 29.97   | 63.18   | 499.67   | 425.26   | 879.26   | 982.85   | 982.85   | 1163.27  | 1262.84  | 1262.84  | 1262.84  | 1262.84  | 1262.84  | 1262.84 | 1262.84  | 1262.84  | 1262.84  | 1262.84  | 1262.84 | 1262.84 | 1262.84  | 1262.84  | 1262.84 | 1262.84 | 1262.84 |        |
| ENMISG00000008290 | Gm1        | 50.7    | 12.22   | 0.00     | 0.00     | 0.00     | 0.00     | 27.76    | 26.48    | 17.31    | 48.35    | 138.23   | 69.87    | 18.77    | 99.18   | 0.00     | 31.76    | 93.44    | 154.44   | 34.44   | 37.34   | 60.40    | 89.35    | 64.31   | 0.00    | 167.92  | 61.33  |
| ENMISG00000008494 | Ln04       | 199.98  | 297.93  | 157.99   | 311.23   | 115.40   | 471.18   | 423.99   | 374.1    | 867.97   | 1086.42  | 175.66   | 60.00    | 69.55    | 5.22    | 34.48    | 74.46    | 281.52   | 179.62   | 181.86  | 156.53  | 174.20   | 315.88   | 708.89  | 269.87  | 548.06  |        |
| ENMISG00000008493 | Ln05       | 199.98  | 297.93  | 157.99   | 311.23   | 115.40   | 471.18   | 423.99   | 374.1    | 867.97   | 1086.42  | 175.66   | 60.00    | 69.55    | 5.22    | 34.48    | 74.46    | 281.52   | 179.62   | 181.86  | 156.53  | 174.20   | 315.88   | 708.89  | 269.87  | 548.06  |        |
| ENMISG00000008296 | Trnc3      |         |         |          |          |          |          |          |          |          |          |          |          |          |         |          |          |          |          |         |         |          |          |         |         |         |        |

|                    |             |         |         |         |         |         |         |          |         |          |          |         |         |         |        |         |         |         |         |         |         |         |         |         |         |         |         |
|--------------------|-------------|---------|---------|---------|---------|---------|---------|----------|---------|----------|----------|---------|---------|---------|--------|---------|---------|---------|---------|---------|---------|---------|---------|---------|---------|---------|---------|
| ENMNSG00000049321  | Zp2         | 106.53  | 41.04   | 221.34  | 212.61  | 224.05  | 161.57  | 351.64   | 126.08  | 110.72   | 0.00     | 0.00    | 36.33   | 83.46   | 0.00   | 155.16  | 139.50  | 43.59   | 81.66   | 0.00    | 99.55   | 64.91   | 78.70   | 26.16   | 58.08   | 43.83   |         |
| ENMNSG00000020395  | Agp2        | 92.42   | 0.00    | 0.00    | 0.00    | 42.97   | 27.28   | 0.00     | 0.00    | 8.52     | 44.89    | 0.00    | 0.00    | 0.00    | 0.00   | 0.00    | 17.52   | 36.33   | 102.35  | 0.00    | 51.42   | 207.73  | 224.92  | 298.06  | 542.56  | 84.82   |         |
| ENMNSG00000078669  | Gm173pe     | 51.86   | 246.11  | 130.42  | 126.63  | 205.63  | 0.00    | 100.87   | 105.80  | 0.00     | 319.48   | 27.49   | 47.73   | 4.64    | 0.00   | 0.00    | 0.00    | 44.63   | 100.17  | 39.74   | 0.00    | 27.49   | 74.47   | 0.00    | 84.59   | 30.21   |         |
| ENMNSG00000030713  | DO3000M21   | 93.26   | 287.93  | 1072.43 | 888.40  | 958.19  | 1063.36 | 1031.48  | 645.43  | 868.25   | 721.44   | 228.08  | 121.37  | 452.00  | 368.02 | 366.29  | 164.00  | 252.16  | 486.71  | 215.17  | 221.18  | 276.69  | 641.45  | 180.14  | 517.66  | 136.21  |         |
| ENMNSG000000102187 | Gm173p      | 33.64   | 234.29  | 0.00    | 0.00    | 74.00   | 100.00  | 118.15   | 158.27  | 207.45   | 198.13   | 0.00    | 0.00    | 0.00    | 0.00   | 0.00    | 0.00    | 0.00    | 0.00    | 0.00    | 0.00    | 133.85  | 90.95   | 0.00    | 143.95  | 0.00    |         |
| ENMNSG000000103851 | Gm2706e     | 131.76  | 0.00    | 0.00    | 0.00    | 0.00    | 0.00    | 0.00     | 0.00    | 0.00     | 108.07   | 0.00    | 0.00    | 18.55   | 55.64  | 0.00    | 0.00    | 27.33   | 0.00    | 0.00    | 0.00    | 16.16   | 0.00    | 0.00    | 0.00    | 0.00    |         |
| ENMNSG000000095759 | Gm25517     | 0.00    | 0.00    | 21.61   | 0.00    | 0.00    | 48.80   | 0.00     | 0.00    | 0.00     | 0.00     | 0.00    | 0.00    | 0.00    | 0.00   | 0.00    | 0.00    | 0.00    | 0.00    | 0.00    | 0.00    | 0.00    | 0.00    | 0.00    | 1.26    | 0.00    |         |
| ENMNSG000000036895 | Asa241      | 157.82  | 1718.22 | 543.50  | 577.64  | 106.99  | 241.26  | 361.59   | 424.32  | 146.84   | 326.54   | 136.71  | 119.73  | 265.16  | 54.51  | 0.00    | 193.80  | 608.66  | 1027.42 | 459.78  | 268.82  | 737.14  | 61.22   | 145.81  | 68.11   | 887.11  | 0.00    |
| ENMNSG000000025608 | Adp2        | 71.96   | 0.00    | 54.40   | 0.00    | 0.00    | 40.66   | 65.36    | 65.12   | 103.55   | 104.28   | 246.07  | 245.05  | 21.25   | 195.75 | 1.44    | 340.26  | 266.71  | 126.31  | 261.35  | 292.64  | 74.08   | 340.39  | 300.23  | 319.44  | 127.53  | 0.00    |
| ENMNSG000000031238 | Agp2        | 1430.72 | 1987.13 | 1530.76 | 2043.98 | 2128.76 | 2036.42 | 2043.78  | 3262.92 | 1797.66  | 2166.20  | 930.69  | 410.48  | 171.56  | 441.10 | 216.83  | 593.81  | 481.54  | 497.80  | 527.52  | 655.66  | 1236.43 | 1430.99 | 300.28  | 1150.22 | 1196.27 | 0.00    |
| ENMNSG000000044338 | Agp2        | 142.86  | 1.07    | 0.00    | 0.00    | 0.00    | 63.05   | 0.00     | 149.55  | 0.00     | 137.00   | 195.99  | 224.2   | 60.26   | 2.22   | 12.12   | 130.07  | 65.48   | 0.00    | 0.00    | 0.00    | 116.78  | 137.75  | 18.75   | 161.28  | 100.00  | 0.00    |
| ENMNSG000000103380 | Gm3815e     | 0.00    | 0.00    | 0.00    | 0.00    | 0.00    | 0.00    | 0.00     | 12.16   | 0.00     | 0.00     | 0.00    | 0.00    | 0.00    | 0.00   | 0.00    | 0.00    | 1.04    | 0.00    | 0.00    | 0.00    | 0.00    | 0.00    | 0.00    | 0.00    | 0.00    | 0.00    |
| ENMNSG000000050489 | Lm011       | 26.17   | 812.48  | 254.88  | 389.89  | 318.67  | 229.22  | 74.59    | 111.57  | 226.65   | 209.08   | 122.20  | 1.89    | 134.47  | 315.82 | 0.00    | 136.46  | 105.87  | 146.48  | 231.24  | 74.01   | 72.80   | 142.17  | 0.00    | 0.00    | 161.71  | 118.36  |
| ENMNSG000000040857 | Erf         | 1050.37 | 1225.16 | 1456.49 | 1645.60 | 1942.77 | 3226.85 | 1956.40  | 2331.27 | 2470.72  | 2979.63  | 442.90  | 339.23  | 148.38  | 234.91 | 393.42  | 328.85  | 378.95  | 665.10  | 700.95  | 288.39  | 971.43  | 636.77  | 715.32  | 672.96  | 1278.36 | 0.00    |
| ENMNSG000000031419 | Zp2b1       | 945.71  | 1486.32 | 1500.95 | 1165.92 | 1492.83 | 210.10  | 1980.81  | 1635.75 | 1254.01  | 2047.70  | 425.40  | 306.35  | 301.39  | 159.21 | 399.39  | 429.59  | 797.03  | 334.27  | 269.78  | 399.83  | 398.65  | 500.97  | 787.55  | 914.12  | 1231.66 | 0.00    |
| ENMNSG000000073504 | Zp2b4       | 173.22  | 185.02  | 165.00  | 179.60  | 221.14  | 178.81  | 1089.52  | 1654.24 | 210.15   | 183.00   | 447.65  | 0.00    | 0.00    | 292.10 | 0.00    | 0.00    | 0.00    | 0.00    | 0.00    | 0.00    | 737.20  | 1071.47 | 612.20  | 912.20  | 652.25  | 0.00    |
| ENMNSG000000041449 | Seia2b3a    | 1186.81 | 866.21  | 1880.29 | 2121.29 | 2525.29 | 2185.10 | 1908.89  | 1518.00 | 1828.11  | 2147.24  | 744.44  | 754.35  | 735.82  | 602.92 | 349.11  | 544.80  | 725.42  | 783.65  | 702.68  | 688.16  | 964.16  | 362.47  | 637.61  | 1280.88 | 0.00    | 0.00    |
| ENMNSG000000009910 | Ra3a3       | 841.03  | 2707.18 | 1690.99 | 1312.26 | 1557.28 | 2060.61 | 1735.47  | 1881.90 | 1678.23  | 1985.13  | 326.88  | 484.70  | 1008.51 | 391.51 | 439.62  | 508.98  | 564.37  | 636.97  | 372.15  | 455.97  | 704.13  | 725.22  | 588.71  | 938.11  | 996.82  | 0.00    |
| ENMNSG000000099919 | Pho2b2      | 258.30  | 377.22  | 415.57  | 302.62  | 964.94  | 217.26  | 381.59   | 424.32  | 146.84   | 326.54   | 136.71  | 119.73  | 265.16  | 54.51  | 0.00    | 193.80  | 608.66  | 1027.42 | 459.78  | 268.82  | 737.14  | 61.22   | 145.81  | 68.11   | 887.11  | 0.00    |
| ENMNSG000000049591 | Pho2b20     | 1412.07 | 127.89  | 85.47   | 86.98   | 241.85  | 2066.83 | 3577.74  | 3600.18 | 1678.28  | 36.02    | 70.26   | 140.69  | 1068.24 | 20.88  | 0.00    | 64.09   | 58.12   | 117.59  | 151.75  | 68.08   | 148.92  | 75.25   | 0.00    | 66.92   | 87.20   | 0.00    |
| ENMNSG000000102977 | Gm173F3     | 33.64   | 232.31  | 0.00    | 1.38    | 0.00    | 0.00    | 0.00     | 32.92   | 0.00     | 0.00     | 0.00    | 0.00    | 0.00    | 31.32  | 0.00    | 51.84   | 0.00    | 55.53   | 0.00    | 0.00    | 26.23   | 0.00    | 0.00    | 11.38   | 0.00    | 0.00    |
| ENMNSG000000099890 | Seia2b3     | 195.93  | 0.00    | 94.96   | 32.44   | 0.00    | 0.00    | 68.25    | 40.07   | 0.00     | 274.92   | 0.00    | 638.80  | 71.87   | 203.68 | 0.00    | 36.64   | 46.70   | 0.00    | 109.60  | 85.07   | 0.00    | 27.93   | 62.96   | 29.51   | 6.00    | 0.00    |
| ENMNSG000000039886 | Man2a2      | 3207.19 | 3482.04 | 3647.29 | 3867.75 | 5167.83 | 4384.13 | 4214.01  | 5269.32 | 4556.85  | 5066.53  | 897.38  | 804.73  | 908.82  | 438.49 | 1.44    | 946.32  | 1314.89 | 1265.29 | 852.40  | 2301.79 | 1578.23 | 1800.49 | 2988.56 | 1859.24 | 0.00    | 0.00    |
| ENMNSG000000039882 | Dhs1        | 365.39  | 217.09  | 386.79  | 217.75  | 217.54  | 641.89  | 303.34   | 200.35  | 397.41   | 395.32   | 17.57   | 204.86  | 95.99   | 107.01 | 0.00    | 118.76  | 91.33   | 207.97  | 0.00    | 236.49  | 794.2   | 274.1   | 118.35  | 217.17  | 78.31   | 0.00    |
| ENMNSG000000099890 | Seia2b3     | 1799.00 | 1151.01 | 1319.11 | 1243.92 | 1479.71 | 1907.34 | 1306.40  | 1575.65 | 2058.13  | 2294.14  | 255.65  | 315.82  | 381.07  | 93.38  | 452.43  | 445.21  | 398.69  | 237.74  | 294.34  | 1016.49 | 906.32  | 725.77  | 684.33  | 2162.44 | 0.00    | 0.00    |
| ENMNSG000000068661 | Osa2f1      | 90.82   | 727.57  | 456.10  | 1237.02 | 1034.30 | 1398.32 | 1167.14  | 967.43  | 1061.52  | 1851.48  | 26.79   | 77.30   | 159.99  | 104.40 | 478.1   | 170.60  | 251.15  | 377.83  | 370.95  | 326.62  | 872.15  | 772.61  | 649.19  | 386.35  | 884.43  | 0.00    |
| ENMNSG000000020144 | Sc1a4       | 1502.12 | 1900.08 | 1971.95 | 2071.41 | 1561.42 | 2462.34 | 2682.85  | 2743.43 | 3174.73  | 4230.00  | 300.91  | 259.88  | 1288.83 | 247.96 | 0.00    | 415.67  | 413.04  | 503.04  | 446.62  | 272.22  | 687.53  | 992.64  | 1378.43 | 1100.24 | 1399.46 | 0.00    |
| ENMNSG000000022206 | Np3         | 82.33   | 227.84  | 0.00    | 0.00    | 0.00    | 0.00    | 0.00     | 0.99    | 0.00     | 46.45    | 0.00    | 51.92   | 81.14   | 120.06 | 0.00    | 80.34   | 217.73  | 57.68   | 0.00    | 17.86   | 7.76    | 0.00    | 253.78  | 195.85  | 0.00    | 0.00    |
| ENMNSG000000085184 | 49343493K11 | 1589.87 | 347.13  | 963.62  | 870.47  | 1033.07 | 1682.63 | 1003.78  | 880.31  | 3024.58  | 1402.11  | 0.00    | 30.92   | 106.85  | 0.00   | 94.82   | 322.35  | 303.77  | 237.10  | 1.20    | 141.11  | 618.55  | 314.80  | 400.25  | 450.75  | 451.95  | 0.00    |
| ENMNSG000000040393 | Lfag2       | 12.15   | 91.48   | 203.46  | 342.39  | 213.81  | 416.41  | 85.96    | 269.05  | 167.33   | 310.00   | 144.34  | 37.88   | 81.14   | 1044   | 392.21  | 88.60   | 45.00   | 146.99  | 183.07  | 127.80  | 76.37   | 168.25  | 9.57    | 97.77   | 64.88   | 0.00    |
| ENMNSG000000036289 | Lm013       | 4326.24 | 892.64  | 654.28  | 758.05  | 691.87  | 1829.28 | 10399.35 | 9546.89 | 11249.84 | 11872.84 | 1326.97 | 821.86  | 804.49  | 970.34 | 1299.94 | 763.67  | 195.96  | 1465.96 | 1985.94 | 1320.33 | 3803.99 | 4352.19 | 3764.98 | 922.65  | 8424.56 | 0.00    |
| ENMNSG000000050931 | Pho2b2      | 99.91   | 901.88  | 789.23  | 1047.87 | 1519.84 | 954.18  | 1399.48  | 2697.10 | 1339.54  | 242.10   | 435.99  | 349.74  | 212.90  | 292.33 | 0.00    | 51.84   | 525.94  | 349.74  | 585.79  | 460.07  | 336.88  | 417.74  | 516.20  | 197.54  | 589.63  | 583.95  |
| ENMNSG000000044493 | Pho2b2      | 1396.16 | 1427.83 | 2191.00 | 2582.99 | 2396.27 | 3724.47 | 4448.81  | 5304.69 | 6245.00  | 5088.50  | 111.50  | 361.78  | 409.05  | 298.56 | 360.40  | 417.10  | 680.79  | 975.00  | 600.00  | 1050.49 | 1033.62 | 2659.79 | 3233.86 | 1677.95 | 3066.89 | 0.00    |
| ENMNSG000000078281 | Pho2b2      | 91.34   | 0.00    | 520.13  | 439.72  | 516.24  | 0.00    | 10.60    | 19.80   | 0.00     | 0.00     | 0.00    | 0.00    | 0.00    | 0.00   | 0.00    | 0.00    | 0.00    | 0.00    | 0.00    | 0.00    | 242.86  | 0.00    | 0.00    | 0.00    | 0.00    | 0.00    |
| ENMNSG000000031836 | Pho2b3      | 499.86  | 692.11  | 1411.52 | 1582.17 | 857.52  | 1834.77 | 2042.36  | 1711.60 | 3512.62  | 3292.44  | 182.53  | 180.12  | 236.48  | 125.28 | 547.36  | 237.92  | 793.91  | 501.04  | 1304.34 | 763.93  | 902.60  | 297.92  | 715.07  | 663.88  | 1775.21 | 1300.89 |
| ENMNSG000000054819 | Pho2b2      | 209.19  | 0.00    | 0.00    | 0.00    | 0.00    | 0.00    | 0.00     | 0.00    | 0.00     | 0.00     | 0.00    | 0.00    | 0.00    | 0.00   | 0.00    | 0.00    | 0.00    | 0.00    | 0.00    | 0.00    | 0.00    | 0.00    | 0.00    | 0.00    | 0.00    | 0.00    |
| ENMNSG000000039245 | Man2        | 465.38  | 2804.34 | 772.63  | 846.52  | 567.79  | 711.31  | 747.73   | 1018.95 | 1137.79  | 1372.72  | 156.92  | 186.30  | 324.58  | 54.81  | 0.00    | 472.14  | 300.96  | 263.43  | 225.22  | 386.18  | 166.18  | 565.29  | 689.59  | 747.46  | 842.46  | 0.00    |
| ENMNSG000000039285 | Eggt        | 809.18  | 530.17  | 2882.18 | 2937.22 | 2882.29 | 3610.42 | 2676.74  | 3316.58 | 3833.78  | 2814.64  | 586.76  | 570.91  | 931.51  | 910.91 | 290.20  | 927.71  | 826.16  | 791.43  | 924.96  | 339.43  | 1240.25 | 680.09  | 1209.91 | 1215.88 | 1720.52 | 0.00    |
| ENMNSG000000102151 | Pho2b2      | 1799.00 | 1151.01 | 1319.11 | 1243.92 | 1479.71 | 1907.34 | 1306.40  | 1575.65 | 2058.13  | 2294.14  | 255.65  | 315.82  | 381.07  | 93.38  | 452.43  | 445.21  | 398.69  | 237.74  | 294.34  | 1016.49 | 906.32  | 725.77  | 684.33  | 2162.44 | 0.00    | 0.00    |
| ENMNSG000000017466 | Pho2b2      | 101.54  | 501.89  | 1275.14 | 1236.33 | 1578.99 | 1548.76 | 1549.35  | 1054.72 | 2831.55  | 1513.97  | 1451.08 | 1032.01 | 713.88  | 869.15 | 738.44  | 1814.41 | 1512.07 | 188.40  | 1730.12 | 1824.75 | 2091.01 | 2309.38 | 1752.63 | 2073.18 | 2412.98 | 0.00    |



|                  |      |        |        |         |        |         |        |         |        |         |        |         |        |         |         |         |        |         |        |         |        |         |        |         |        |         |        |         |        |         |
|------------------|------|--------|--------|---------|--------|---------|--------|---------|--------|---------|--------|---------|--------|---------|---------|---------|--------|---------|--------|---------|--------|---------|--------|---------|--------|---------|--------|---------|--------|---------|
| ENMRSG0000042407 | Asak | 44.86  | 0.00   | 0.00    | 0.00   | 42.97   | 52.54  | 0.00    | 0.00   | 0.00    | 0.00   | 0.00    | 54.98  | 654.52  | 1027.37 | 579.80  | 386.29 | 725.51  | 382.10 | 438.99  | 211.23 | 381.79  | 239.90 | 332.21  | 147.25 | 35.68   | 90.91  | 41.39   |        |         |
| ENMRSG0000042408 | Adel | 20.00  | 0.00   | 0.00    | 0.00   | 0.00    | 19.95  | 0.00    | 0.00   | 0.00    | 0.00   | 0.00    | 19.95  | 19.95   | 0.00    | 0.00    | 0.00   | 0.00    | 0.00   | 0.00    | 0.00   | 0.00    | 0.00   | 0.00    | 0.00   | 0.00    | 0.00   | 0.00    | 0.00   |         |
| ENMRSG0000042409 | Edg1 | 91.58  | 299.00 | 0.00    | 0.00   | 19.03   | 0.00   | 0.00    | 14.31  | 0.00    | 0.00   | 0.00    | 44.56  | 66.68   | 62.07   | 81.80   | 368.02 | 409.45  | 805.88 | 318.60  | 562.93 | 560.04  | 143.77 | 263.48  | 297.03 | 242.79  | 156.56 | 238.26  | 0.00   |         |
| ENMRSG0000042410 | Fg23 | 0.00   | 0.00   | 0.00    | 0.00   | 0.00    | 0.00   | 0.00    | 0.00   | 0.00    | 0.00   | 0.00    | 0.00   | 10.44   | 19.33   | 62.80   | 143.56 | 0.00    | 71.83  | 185.67  | 161.83 | 93.74   | 0.00   | 0.00    | 0.00   | 0.00    | 0.00   | 37.88   | 0.00   |         |
| ENMRSG0000042411 | Gp28 | 23.82  | 8.00   | 0.00    | 0.00   | 0.00    | 0.00   | 0.00    | 0.00   | 0.00    | 0.00   | 0.00    | 119.22 | 169.89  | 1.11    | 0.00    | 0.00   | 0.00    | 0.00   | 0.00    | 0.00   | 0.00    | 0.00   | 0.00    | 0.00   | 234.32  | 296.81 | 584.81  | 0.00   |         |
| ENMRSG0000042412 | K21  | 7.48   | 0.00   | 0.00    | 0.00   | 0.00    | 0.00   | 0.00    | 0.00   | 0.00    | 0.00   | 0.00    | 0.212  | 163.11  | 143.74  | 67.86   | 35.92  | 184.74  | 258.41 | 31.13   | 220.40 | 205.87  | 170.31 | 86.32   | 0.00   | 42.93   | 112.99 | 0.00    | 0.00   |         |
| ENMRSG0000042413 | Sg15 | 29.90  | 0.00   | 0.00    | 0.00   | 44.87   | 20.87  | 46.83   | 39.78  | 4.29    | 0.00   | 0.00    | 82.59  | 245.17  | 191.77  | 90.69   | 0.00   | 41.47   | 37.56  | 154.41  | 43.36  | 20.42   | 246.68 | 0.00    | 0.00   | 120.96  | 89.64  | 30.20   | 0.00   |         |
| ENMRSG0000042414 | Hm17 | 238.39 | 65.45  | 1598.54 | 881.51 | 1077.81 | 881.51 | 1077.81 | 881.51 | 1077.81 | 881.51 | 1077.81 | 881.51 | 1077.81 | 881.51  | 1077.81 | 881.51 | 1077.81 | 881.51 | 1077.81 | 881.51 | 1077.81 | 881.51 | 1077.81 | 881.51 | 1077.81 | 881.51 | 1077.81 | 881.51 | 1077.81 |
| ENMRSG0000042415 | Hs12 | 147.26 | 0.00   | 0.00    | 0.00   | 0.00    | 0.00   | 0.00    | 0.00   | 0.00    | 0.00   | 0.00    | 0.2723 | 85.03   | 41.73   | 67.86   | 123.47 | 115.29  | 138.99 | 114.33  | 274.60 | 51.04   | 16.04  | 16.40   | 16.40  | 16.40   | 35.05  | 109.85  | 0.00   |         |
| ENMRSG0000042416 | Adm1 | 37.38  | 0.00   | 0.00    | 0.00   | 0.00    | 0.00   | 0.00    | 0.00   | 0.00    | 0.00   | 0.00    | 22.30  | 30.28   | 11.24   | 67.86   | 349.11 | 217.77  | 51.89  | 151.35  | 10.36  | 10.36   | 26.36  | 0.00    | 0.00   | 61.13   | 0.00   | 0.00    | 0.00   |         |
| ENMRSG0000042417 | Adm1 | 0.00   | 0.00   | 0.00    | 0.00   | 0.00    | 0.00   | 0.00    | 0.00   | 0.00    | 0.00   | 0.00    | 0.2282 | 40.26   | 18.24   | 107.01  | 0.00   | 39.20   | 0.00   | 142.54  | 0.00   | 10.36   | 28.36  | 0.00    | 0.00   | 20.87   | 20.87  | 0.00    | 0.00   |         |
| ENMRSG0000042418 | Adm1 | 0.00   | 0.00   | 0.00    | 0.00   | 0.00    | 0.00   | 0.00    | 0.00   | 0.00    | 0.00   | 0.00    | 0.2402 | 30.42   | 18.24   | 107.01  | 0.00   | 44.11   | 152.56 | 344.09  | 0.00   | 10.36   | 28.36  | 0.00    | 0.00   | 18.39   | 18.39  | 68.24   | 0.00   |         |
| ENMRSG0000042419 | Adm1 | 0.00   | 0.00   | 0.00    | 0.00   | 0.00    | 0.00   | 0.00    | 0.00   | 0.00    | 0.00   | 0.00    | 0.2533 | 30.42   | 18.24   | 107.01  | 0.00   | 44.11   | 152.56 | 344.09  | 0.00   | 10.36   | 28.36  | 0.00    | 0.00   | 18.39   | 18.39  | 68.24   | 0.00   |         |
| ENMRSG0000042420 | Adm1 | 0.00   | 0.00   | 0.00    | 0.00   | 0.00    | 0.00   | 0.00    | 0.00   | 0.00    | 0.00   | 0.00    | 0.2664 | 30.42   | 18.24   | 107.01  | 0.00   | 44.11   | 152.56 | 344.09  | 0.00   | 10.36   | 28.36  | 0.00    | 0.00   | 18.39   | 18.39  | 68.24   | 0.00   |         |
| ENMRSG0000042421 | Adm1 | 0.00   | 0.00   | 0.00    | 0.00   | 0.00    | 0.00   | 0.00    | 0.00   | 0.00    | 0.00   | 0.00    | 0.2795 | 30.42   | 18.24   | 107.01  | 0.00   | 44.11   | 152.56 | 344.09  | 0.00   | 10.36   | 28.36  | 0.00    | 0.00   | 18.39   | 18.39  | 68.24   | 0.00   |         |
| ENMRSG0000042422 | Adm1 | 0.00   | 0.00   | 0.00    | 0.00   | 0.00    | 0.00   | 0.00    | 0.00   | 0.00    | 0.00   | 0.00    | 0.2926 | 30.42   | 18.24   | 107.01  | 0.00   | 44.11   | 152.56 | 344.09  | 0.00   | 10.36   | 28.36  | 0.00    | 0.00   | 18.39   | 18.39  | 68.24   | 0.00   |         |
| ENMRSG0000042423 | Adm1 | 0.00   | 0.00   | 0.00    | 0.00   | 0.00    | 0.00   | 0.00    | 0.00   | 0.00    | 0.00   | 0.00    | 0.3057 | 30.42   | 18.24   | 107.01  | 0.00   | 44.11   | 152.56 | 344.09  | 0.00   | 10.36   | 28.36  | 0.00    | 0.00   | 18.39   | 18.39  | 68.24   | 0.00   |         |
| ENMRSG0000042424 | Adm1 | 0.00   | 0.00   | 0.00    | 0.00   | 0.00    | 0.00   | 0.00    | 0.00   | 0.00    | 0.00   | 0.00    | 0.3188 | 30.42   | 18.24   | 107.01  | 0.00   | 44.11   | 152.56 | 344.09  | 0.00   | 10.36   | 28.36  | 0.00    | 0.00   | 18.39   | 18.39  | 68.24   | 0.00   |         |
| ENMRSG0000042425 | Adm1 | 0.00   | 0.00   | 0.00    | 0.00   | 0.00    | 0.00   | 0.00    | 0.00   | 0.00    | 0.00   | 0.00    | 0.3319 | 30.42   | 18.24   | 107.01  | 0.00   | 44.11   | 152.56 | 344.09  | 0.00   | 10.36   | 28.36  | 0.00    | 0.00   | 18.39   | 18.39  | 68.24   | 0.00   |         |
| ENMRSG0000042426 | Adm1 | 0.00   | 0.00   | 0.00    | 0.00   | 0.00    | 0.00   | 0.00    | 0.00   | 0.00    | 0.00   | 0.00    | 0.3450 | 30.42   | 18.24   | 107.01  | 0.00   | 44.11   | 152.56 | 344.09  | 0.00   | 10.36   | 28.36  | 0.00    | 0.00   | 18.39   | 18.39  | 68.24   | 0.00   |         |
| ENMRSG0000042427 | Adm1 | 0.00   | 0.00   | 0.00    | 0.00   | 0.00    | 0.00   | 0.00    | 0.00   | 0.00    | 0.00   | 0.00    | 0.3581 | 30.42   | 18.24   | 107.01  | 0.00   | 44.11   | 152.56 | 344.09  | 0.00   | 10.36   | 28.36  | 0.00    | 0.00   | 18.39   | 18.39  | 68.24   | 0.00   |         |
| ENMRSG0000042428 | Adm1 | 0.00   | 0.00   | 0.00    | 0.00   | 0.00    | 0.00   | 0.00    | 0.00   | 0.00    | 0.00   | 0.00    | 0.3712 | 30.42   | 18.24   | 107.01  | 0.00   | 44.11   | 152.56 | 344.09  | 0.00   | 10.36   | 28.36  | 0.00    | 0.00   | 18.39   | 18.39  | 68.24   | 0.00   |         |
| ENMRSG0000042429 | Adm1 | 0.00   | 0.00   | 0.00    | 0.00   | 0.00    | 0.00   | 0.00    | 0.00   | 0.00    | 0.00   | 0.00    | 0.3843 | 30.42   | 18.24   | 107.01  | 0.00   | 44.11   | 152.56 | 344.09  | 0.00   | 10.36   | 28.36  | 0.00    | 0.00   | 18.39   | 18.39  | 68.24   | 0.00   |         |
| ENMRSG0000042430 | Adm1 | 0.00   | 0.00   | 0.00    | 0.00   | 0.00    | 0.00   | 0.00    | 0.00   | 0.00    | 0.00   | 0.00    | 0.3974 | 30.42   | 18.24   | 107.01  | 0.00   | 44.11   | 152.56 | 344.09  | 0.00   | 10.36   | 28.36  | 0.00    | 0.00   | 18.39   | 18.39  | 68.24   | 0.00   |         |
| ENMRSG0000042431 | Adm1 | 0.00   | 0.00   | 0.00    | 0.00   | 0.00    | 0.00   | 0.00    | 0.00   | 0.00    | 0.00   | 0.00    | 0.4105 | 30.42   | 18.24   | 107.01  | 0.00   | 44.11   | 152.56 | 344.09  | 0.00   | 10.36   | 28.36  | 0.00    | 0.00   | 18.39   | 18.39  | 68.24   | 0.00   |         |
| ENMRSG0000042432 | Adm1 | 0.00   | 0.00   | 0.00    | 0.00   | 0.00    | 0.00   | 0.00    | 0.00   | 0.00    | 0.00   | 0.00    | 0.4236 | 30.42   | 18.24   | 107.01  | 0.00   | 44.11   | 152.56 | 344.09  | 0.00   | 10.36   | 28.36  | 0.00    | 0.00   | 18.39   | 18.39  | 68.24   | 0.00   |         |
| ENMRSG0000042433 | Adm1 | 0.00   | 0.00   | 0.00    | 0.00   | 0.00    | 0.00   | 0.00    | 0.00   | 0.00    | 0.00   | 0.00    | 0.4367 | 30.42   | 18.24   | 107.01  | 0.00   | 44.11   | 152.56 | 344.09  | 0.00   | 10.36   | 28.36  | 0.00    | 0.00   | 18.39   | 18.39  | 68.24   | 0.00   |         |
| ENMRSG0000042434 | Adm1 | 0.00   | 0.00   | 0.00    | 0.00   | 0.00    | 0.00   | 0.00    | 0.00   | 0.00    | 0.00   | 0.00    | 0.4498 | 30.42   | 18.24   | 107.01  | 0.00   | 44.11   | 152.56 | 344.09  | 0.00   | 10.36   | 28.36  | 0.00    | 0.00   | 18.39   | 18.39  | 68.24   | 0.00   |         |
| ENMRSG0000042435 | Adm1 | 0.00   | 0.00   | 0.00    | 0.00   | 0.00    | 0.00   | 0.00    | 0.00   | 0.00    | 0.00   | 0.00    | 0.4629 | 30.42   | 18.24   | 107.01  | 0.00   | 44.11   | 152.56 | 344.09  | 0.00   | 10.36   | 28.36  | 0.00    | 0.00   | 18.39   | 18.39  | 68.24   | 0.00   |         |
| ENMRSG0000042436 | Adm1 | 0.00   | 0.00   | 0.00    | 0.00   | 0.00    | 0.00   | 0.00    | 0.00   | 0.00    | 0.00   | 0.00    | 0.4760 | 30.42   | 18.24   | 107.01  | 0.00   | 44.11   | 152.56 | 344.09  | 0.00   | 10.36   | 28.36  | 0.00    | 0.00   | 18.39   | 18.39  | 68.24   | 0.00   |         |
| ENMRSG0000042437 | Adm1 | 0.00   | 0.00   | 0.00    | 0.00   | 0.00    | 0.00   | 0.00    | 0.00   | 0.00    | 0.00   | 0.00    | 0.4891 | 30.42   | 18.24   | 107.01  | 0.00   | 44.11   | 152.56 | 344.09  | 0.00   | 10.36   | 28.36  | 0.00    | 0.00   | 18.39   | 18.39  | 68.24   | 0.00   |         |
| ENMRSG0000042438 | Adm1 | 0.00   | 0.00   | 0.00    | 0.00   | 0.00    | 0.00   | 0.00    | 0.00   | 0.00    | 0.00   | 0.00    | 0.5022 | 30.42   | 18.24   | 107.01  | 0.00   | 44.11   | 152.56 | 344.09  | 0.00   | 10.36   | 28.36  | 0.00    | 0.00   | 18.39   | 18.39  | 68.24   | 0.00   |         |
| ENMRSG0000042439 | Adm1 | 0.00   | 0.00   | 0.00    | 0.00   | 0.00    | 0.00   | 0.00    | 0.00   | 0.00    | 0.00   | 0.00    | 0.5153 | 30.42   | 18.24   | 107.01  | 0.00   | 44.11   | 152.56 | 344.09  | 0.00   | 10.36   | 28.36  | 0.00    | 0.00   | 18.39   | 18.39  | 68.24   | 0.00   |         |
| ENMRSG0000042440 | Adm1 | 0.00   | 0.00   | 0.00    | 0.00   | 0.00    | 0.00   | 0.00    | 0.00   | 0.00    | 0.00   | 0.00    | 0.5284 | 30.42   | 18.24   | 107.01  | 0.00   | 44.11   | 152.56 | 344.09  | 0.00   | 10.36   | 28.36  | 0.00    | 0.00   | 18.39   | 18.39  | 68.24   | 0.00   |         |
| ENMRSG0000042441 | Adm1 | 0.00   | 0.00   | 0.00    | 0.00   | 0.00    | 0.00   | 0.00    | 0.00   | 0.00    | 0.00   | 0.00    | 0.5415 | 30.42   | 18.24   | 107.01  | 0.00   | 44.11   | 152.56 | 344.09  | 0.00   | 10.36   | 28.36  | 0.00    | 0.00   | 18.39   | 18.39  | 68.24   | 0.00   |         |
| ENMRSG0000042442 | Adm1 | 0.00   | 0.00   | 0.00    | 0.00   | 0.00    | 0.00   | 0.00    | 0.00   | 0.00    | 0.00   | 0.00    | 0.5546 | 30.42   | 18.24   | 107.01  | 0.00   | 44.11   | 152.56 | 344.09  | 0.00   | 10.36   | 28.36  | 0.00    | 0.00   | 18.39   | 18.39  | 68.24   | 0.00   |         |
| ENMRSG0000042443 | Adm1 | 0.00   | 0.00   | 0.00    | 0.00   | 0.00    | 0.00   | 0.00    | 0.00   | 0.00    | 0.00   | 0.00    | 0.5677 | 30.42   | 18.24   | 107.01  | 0.00   | 44.11   | 152.56 | 344.09  | 0.00   | 10.36   | 28.36  | 0.00    | 0.00   | 18.39   | 18.39  | 68.24   | 0.00   |         |
| ENMRSG0000042444 | Adm1 | 0.00   | 0.00   | 0.00    | 0.00   | 0.00    | 0.00   | 0.00    | 0.00   | 0.00    | 0.00   | 0.00    | 0.5808 | 30.42   | 18.24   | 107.01  | 0.00   | 44.11   | 152.56 | 344.09  | 0.00   | 10.36   | 28.36  | 0.00    | 0.00   | 18.39   | 18.39  | 68.24   | 0.00   |         |
| ENMRSG0000042445 | Adm1 | 0.00   | 0.00   | 0.00    | 0.00   | 0.00    | 0.00   | 0.00    | 0.00   | 0.00    | 0.00   | 0.00    | 0.5939 | 30.42   | 18.24   | 107.01  | 0.00   | 44.11   | 152.56 | 344.09  | 0.00   | 10.36   | 28.36  | 0.00    | 0.00   | 18.39   | 18.39  | 68.24   | 0.00   |         |
| ENMRSG0000042446 | Adm1 | 0.00   | 0.00   | 0.00    | 0.00   | 0.00    | 0.00   | 0.00    | 0.00   | 0.00    | 0.00   | 0.00    | 0.6070 | 30.42   | 18.24   | 107.01  | 0.00   | 44.11   | 152.56 | 344.09  | 0.00   | 10.36   | 28.36  | 0.00    | 0.00   | 18.39   | 18.39  | 68.24   | 0.00   |         |
| ENMRSG0000042447 | Adm1 | 0.00   | 0.00   | 0.00    | 0.00   | 0.00    | 0.00   | 0.00    | 0.00   | 0.00    | 0.00   | 0.00    | 0.6201 | 30.42   | 18.24   | 107.01  | 0.00   | 44.11   | 152.56 | 344.09  | 0.00   | 10.36   | 28.36  | 0.00    | 0.00   | 18.39   | 18.39  | 68.24   | 0.00   |         |
| ENMRSG0000042448 | Adm1 | 0.00   | 0.00   | 0.      |        |         |        |         |        |         |        |         |        |         |         |         |        |         |        |         |        |         |        |         |        |         |        |         |        |         |



Supplementary Table 3 - Normalized counts of the top 500 specifically upregulated genes of Late-AE across mTEC<sup>hi</sup>, mTEC<sup>int</sup>, mTEC<sup>lo</sup>, mTEC<sup>int</sup>, and mTEC<sup>lo</sup>.

| geneID                          | mTEC <sup>hi</sup> | mTEC <sup>int</sup> | mTEC <sup>lo</sup> | mTEC <sup>int</sup> | mTEC <sup>lo</sup> | mTEC <sup>hi</sup> | mTEC <sup>int</sup> | mTEC <sup>lo</sup> | mTEC <sup>int</sup> | mTEC <sup>lo</sup> | mTEC <sup>hi</sup> | mTEC <sup>int</sup> | mTEC <sup>lo</sup> | mTEC <sup>int</sup> | mTEC <sup>lo</sup> |
|---------------------------------|--------------------|---------------------|--------------------|---------------------|--------------------|--------------------|---------------------|--------------------|---------------------|--------------------|--------------------|---------------------|--------------------|---------------------|--------------------|
| ENMMSG000000021488 Pff1         | 0.00               | 0.00                | 0.00               | 0.00                | 0.00               | 0.00               | 0.00                | 0.00               | 0.00                | 0.00               | 17.61              | 0.00                | 0.00               | 22.87               | 0.00               |
| ENMMSG000000022415 Thp          | 0.00               | 0.00                | 0.00               | 0.00                | 0.00               | 0.00               | 0.00                | 0.00               | 0.00                | 0.00               | 16.84              | 0.00                | 0.00               | 88.37               | 0.00               |
| ENMMSG000000023171 Kctd26       | 243.74             | 655.57              | 121.48             | 47.63               | 15.35              | 47.95              | 68.91               | 44.36              | 153.84              | 0.00               | 419.41             | 479.25              | 237.55             | 387.08              | 48.24              |
| ENMMSG000000023579 Hn1b         | 126.67             | 275.78              | 0.00               | 0.00                | 0.00               | 0.00               | 0.00                | 0.00               | 0.00                | 0.00               | 329.20             | 493.20              | 362.86             | 962.00              | 39.11              |
| ENMMSG000000023628 Hn1b         | 29.00              | 0.00                | 0.00               | 0.00                | 0.00               | 0.00               | 0.00                | 0.00               | 0.00                | 0.00               | 0.00               | 0.00                | 0.00               | 0.00                | 0.00               |
| ENMMSG000000024335 Anx1b        | 4.81               | 25.78               | 0.00               | 0.00                | 0.00               | 0.00               | 0.00                | 0.00               | 0.00                | 0.00               | 27.84              | 19.35               | 37.25              | 72.26               | 0.00               |
| ENMMSG000000025777 Smn1l        | 521.45             | 0.00                | 0.00               | 0.69                | 0.00               | 0.23               | 0.30                | 0.00               | 0.00                | 0.00               | 774.83             | 531.85              | 793.25             | 441.10              | 17.91              |
| ENMMSG000000026326 Cst2         | 293.43             | 0.00                | 0.00               | 0.00                | 0.00               | 0.00               | 0.00                | 0.00               | 0.00                | 0.00               | 219.29             | 288.28              | 120.29             | 29.85               | 0.00               |
| ENMMSG000000026340 Gsd2         | 100.85             | 204.19              | 178.12             | 115.97              | 74.89              | 122.18             | 41.82               | 170.20             | 108.39              | 303.36             | 1188.70            | 124.54              | 114.23             | 99.12               | 344.22             |
| ENMMSG000000026342 Sca5         | 884.97             | 219.02              | 0.00               | 0.00                | 13.50              | 22.99              | 0.00                | 37.21              | 0.00                | 0.00               | 116.67             | 769.95              | 107.90             | 91.74               | 34.26              |
| ENMMSG000000027128 Cst2         | 149.27             | 307.37              | 0.00               | 0.00                | 0.00               | 39.29              | 0.00                | 0.27               | 0.00                | 0.00               | 149.27             | 307.37              | 0.00               | 0.00                | 0.00               |
| ENMMSG000000026530 Cst2a        | 30.84              | 0.00                | 0.00               | 0.00                | 0.00               | 0.00               | 0.00                | 0.00               | 0.00                | 0.00               | 22.01              | 137.60              | 99.89              | 18.70               | 0.00               |
| ENMMSG000000026156 Hn1b         | 159.20             | 0.00                | 0.00               | 0.00                | 0.00               | 0.00               | 0.00                | 0.00               | 0.00                | 0.00               | 32.35              | 171.38              | 50.56              | 120.36              | 0.00               |
| ENMMSG000000026528 Cst2b        | 2571.74            | 1486.32             | 105.08             | 140.13              | 98.83              | 112.97             | 41.91               | 93.74              | 0.00                | 0.00               | 78.88              | 5241.47             | 6445.61            | 4995.66             | 6785.74            |
| ENMMSG000000024448 Hn1b         | 150.45             | 0.00                | 0.00               | 0.00                | 0.00               | 0.00               | 0.00                | 0.00               | 0.00                | 0.00               | 311.60             | 319.95              | 271.25             | 279.28              | 137.02             |
| ENMMSG000000022285 Hn1b         | 151.29             | 127.89              | 22.25              | 10.88               | 0.00               | 141.21             | 198.91              | 115.20             | 97.50               | 45.55              | 150.92             | 45.55               | 176.20             | 167.74              | 408.89             |
| ENMMSG000000020494 Ndr5b        | 0.00               | 0.00                | 0.00               | 0.00                | 0.00               | 0.00               | 0.00                | 0.00               | 0.00                | 0.00               | 87.83              | 0.00                | 0.00               | 140.94              | 0.00               |
| ENMMSG000000020417 H27          | 29.34              | 0.00                | 0.00               | 0.00                | 0.00               | 0.00               | 0.00                | 0.00               | 0.00                | 0.00               | 56.93              | 72.49               | 323.90             | 790.16              | 28.94              |
| ENMMSG000000027776 Cst2         | 33.34              | 0.00                | 0.00               | 0.00                | 0.00               | 0.00               | 0.00                | 0.00               | 0.00                | 0.00               | 116.67             | 769.95              | 107.90             | 91.74               | 34.26              |
| ENMMSG000000023898 Krt16/1b     | 234.36             | 0.00                | 0.00               | 0.00                | 0.00               | 0.00               | 0.00                | 0.00               | 0.00                | 0.00               | 17.28              | 61.07               | 90.42              | 62.84               | 120.88             |
| ENMMSG000000020161 Hn1b/1+ps    | 0.00               | 0.00                | 0.00               | 0.00                | 0.00               | 0.00               | 0.00                | 0.00               | 0.00                | 0.00               | 0.00               | 0.00                | 0.00               | 0.00                | 0.00               |
| ENMMSG000000020182 Hn1b         | 146.72             | 0.00                | 0.00               | 0.00                | 0.00               | 0.00               | 0.00                | 0.00               | 0.00                | 0.00               | 27.85              | 214.91              | 141.87             | 237.81              | 0.00               |
| ENMMSG000000024948 Krt8         | 63.55              | 106.40              | 0.00               | 0.00                | 0.00               | 0.00               | 0.00                | 0.00               | 0.00                | 0.00               | 21.85              | 96.63               | 83.46              | 52.20               | 0.00               |
| ENMMSG000000022021 Cdk8         | 377.54             | 468.87              | 23.10              | 0.00                | 34.37              | 0.00               | 0.00                | 20.75              | 0.00                | 0.00               | 182.67             | 1106.99             | 1020.10            | 1681.70             | 227.66             |
| ENMMSG000000020720 AY71185      | 0.00               | 0.00                | 0.00               | 0.00                | 0.00               | 0.00               | 0.00                | 0.00               | 0.00                | 0.00               | 20.62              | 160.78              | 245.75             | 383.96              | 140.78             |
| ENMMSG000000020442 Ctd          | 240.05             | 0.00                | 0.00               | 11.66               | 38.41              | 0.00               | 12.16               | 0.00               | 0.00                | 0.00               | 258.67             | 372.70              | 194.75             | 97.42               | 191.07             |
| ENMMSG000000020878 L3Z01        | 96.25              | 0.00                | 0.00               | 0.00                | 0.00               | 0.00               | 0.00                | 0.00               | 0.00                | 0.00               | 29.90              | 24.91               | 91.14              | 0.00                | 0.00               |
| ENMMSG000000020280 Gsd2         | 105.65             | 72.01               | 0.00               | 62.46               | 44.20              | 0.00               | 34.81               | 60.82              | 0.00                | 0.00               | 7.58               | 151.22              | 9.28               | 25.50               | 75.69              |
| ENMMSG000000022448 Mf2          | 248.77             | 0.00                | 0.00               | 57.38               | 118.68             | 0.00               | 180.44              | 72.27              | 46.62               | 0.00               | 62.85              | 214.84              | 383.99             | 1111.33             | 278.50             |
| ENMMSG000000020282 H2t1         | 0.00               | 0.00                | 0.00               | 0.00                | 0.00               | 0.00               | 0.00                | 0.00               | 0.00                | 0.00               | 17.55              | 44.53               | 10.44              | 0.00                | 0.00               |
| ENMMSG000000020253 H2t          | 859.74             | 326.71              | 0.00               | 60.16               | 0.00               | 56.48              | 199.38              | 36.49              | 76.82               | 148.4              | 186.65             | 189.49              | 189.49             | 144.96              | 0.00               |
| ENMMSG000000024279 Hn1b         | 149.27             | 0.00                | 0.00               | 0.00                | 0.00               | 0.00               | 0.00                | 0.00               | 0.00                | 0.00               | 22.35              | 171.38              | 50.56              | 120.36              | 0.00               |
| ENMMSG0000000200283 22000202z4f | 0.00               | 0.00                | 0.00               | 0.00                | 0.00               | 0.00               | 0.00                | 0.00               | 0.00                | 0.00               | 128.31             | 0.00                | 120.56             | 2.61                | 21.91              |
| ENMMSG000000020173 Pkt1         | 256.99             | 170.23              | 95.39              | 58.68               | 0.00               | 0.00               | 0.00                | 5.83               | 79.72               | 85.52              | 47.79              | 296.52              | 114.85             | 92.81               | 68.06              |
| ENMMSG000000020149 Hn1b         | 199.20             | 0.00                | 0.00               | 0.00                | 0.00               | 0.00               | 0.00                | 0.00               | 0.00                | 0.00               | 32.35              | 171.38              | 50.56              | 120.36              | 0.00               |
| ENMMSG000000020292 Acp2         | 23.36              | 0.00                | 0.00               | 0.00                | 0.00               | 0.00               | 0.00                | 0.00               | 0.00                | 0.00               | 40.07              | 350.19              | 268.94             | 50.96               | 0.00               |
| ENMMSG000000020374 Gm212        | 65.41              | 0.00                | 0.00               | 0.00                | 0.00               | 0.00               | 0.00                | 0.00               | 0.00                | 0.00               | 35.05              | 108.23              | 158.47             | 86.13               | 46.17              |
| ENMMSG000000020815 H2t1         | 325.21             | 0.00                | 0.00               | 24.82               | 23.41              | 0.00               | 0.00                | 0.00               | 0.00                | 0.00               | 104.04             | 328.16              | 208.94             | 328.16              | 208.94             |
| ENMMSG000000020715 Hgn3         | 126.16             | 0.00                | 0.00               | 0.00                | 0.00               | 0.00               | 0.00                | 0.00               | 0.00                | 0.00               | 64.01              | 58.75               | 259.66             | 73.30               | 504.26             |
| ENMMSG000000020374 Gm214/Gm218  | 86.67              | 141.86              | 35.77              | 21.40               | 22.10              | 0.00               | 65.36               | 0.00               | 0.00                | 0.00               | 101.39             | 109.02              | 112.16             | 127.85              | 96.79              |
| ENMMSG000000020484 Eomes        | 86.78              | 0.00                | 0.00               | 0.00                | 0.00               | 0.00               | 0.00                | 0.00               | 0.00                | 0.00               | 185.99             | 95.42               | 254.97             | 43.02               | 63.02              |
| ENMMSG000000020849 Prgmr3       | 0.00               | 0.00                | 0.00               | 0.00                | 0.00               | 0.00               | 0.00                | 0.00               | 0.00                | 0.00               | 0.00               | 0.00                | 0.00               | 0.00                | 0.00               |
| ENMMSG000000020977 Gm1H5/12     | 95.46              | 0.00                | 0.00               | 0.00                | 0.00               | 0.00               | 0.00                | 0.00               | 0.00                | 0.00               | 20.51              | 125.19              | 0.00               | 0.00                | 0.00               |
| ENMMSG000000020702 Cdk2         | 29.96              | 0.00                | 0.00               | 0.00                | 0.00               | 0.00               | 0.00                | 0.00               | 0.00                | 0.00               | 19.25              | 29.91               | 91.24              | 97.96               | 0.00               |
| ENMMSG000000020740 Myc2         | 92.84              | 0.00                | 0.00               | 11.66               | 0.00               | 0.00               | 0.00                | 0.00               | 0.00                | 0.00               | 299.38             | 20.22               | 245.75             | 182.70              | 671.79             |
| ENMMSG000000020816 Ckd2         | 5.24               | 0.00                | 0.00               | 0.00                | 0.00               | 0.00               | 0.00                | 0.00               | 0.00                | 0.00               | 111.10             | 194.44              | 159.97             | 187.92              | 0.00               |
| ENMMSG000000020152 Ckd2         | 203.72             | 0.00                | 0.00               | 42.80               | 24.55              | 57.80              | 84.80               | 51.44              | 27.26               | 25.20              | 31.28              | 382.44              | 269.16             | 65.16               | 62.16              |
| ENMMSG0000000204026 Sca5        | 1995.18            | 257.93              | 0.00               | 48.44               | 40.51              | 91.23              | 13.80               | 82.75              | 581.13              | 302.07             | 207.77             | 1138.34             | 4890.35            | 6091.40             | 4159.09            |
| ENMMSG000000020218 Hn1b         | 199.20             | 0.00                | 0.00               | 0.00                | 0.00               | 0.00               | 0.00                | 0.00               | 0.00                | 0.00               | 32.35              | 171.38              | 50.56              | 120.36              | 0.00               |
| ENMMSG0000000203472 Gscam2b     | 352.58             | 29.62               | 0.00               | 0.00                | 0.00               | 0.00               | 0.00                | 0.00               | 0.00                | 0.00               | 116.83             | 575.91              | 73.94              | 149.06              | 0.00               |
| ENMMSG000000020297 Hn1b         | 64.41              | 0.00                | 0.00               | 0.00                | 0.00               | 0.00               | 0.00                | 0.00               | 0.00                | 0.00               | 27.59              | 294.53              | 273.57             | 187.92              | 281.64             |
| ENMMSG000000020258 Hn1b         | 113.07             | 0.00                | 0.00               | 0.00                | 0.00               | 0.00               | 0.00                | 0.00               | 0.00                | 0.00               | 151.75             | 82.75               | 82.75              | 82.75               | 82.75              |
| ENMMSG0000000203301 Cdt         | 17.08              | 0.00                | 0.00               | 0.00                | 0.00               | 0.00               | 0.00                | 0.00               | 0.00                | 0.00               | 65.54              | 72.67               | 44.58              | 428.05              | 0.00               |
| ENMMSG000000020910 Gm1H3        | 38.31              | 0.00                | 0.00               | 0.00                | 0.00               | 0.00               | 0.00                | 0.00               | 0.00                | 0.00               | 92.48              | 47.16               | 92.47              | 229.89              | 86.20              |
| ENMMSG000000020878 Hn1b         | 0.00               | 0.00                | 0.00               | 0.00                | 0.00               | 0.00               | 0.00                | 0.00               | 0.00                | 0.00               | 32.35              | 171.38              | 50.56              | 120.36              | 0.00               |
| ENMMSG0000000203121 Sesp3a/2    | 163.54             | 78.45               | 0.00               | 0.00                | 0.00               | 0.00               | 124.32              | 71.56              | 0.00                | 0.00               | 111.87             | 310.84              | 47.93              | 55.64               | 9.18               |
| ENMMSG000000020443 HD5          | 194.38             | 0.00                | 0.00               | 0.00                | 0.00               | 0.00               | 0.00                | 0.00               | 0.00                | 0.00               | 0.00               | 34.01               | 2.32               | 0.00                | 0.00               |
| ENMMSG000000020329 Fcrl1        | 18.69              | 0.00                | 0.00               | 0.00                | 0.00               | 0.00               | 0.00                | 0.00               | 0.00                | 0.00               | 19.57              | 18.69               | 4.84               | 13.32               | 0.00               |
| ENMMSG000000020240 Fcrl2/1      | 144.85             | 0.00                | 0.00               | 42.11               | 23.94              | 8.54               | 130.00              | 35.79              | 0.00                | 0.00               | 24.65              | 107.89              | 158.47             | 115.92              | 52.20              |
| ENMMSG0000000205423 H2b2        | 18.69              | 0.00                | 0.00               | 0.00                | 0.00               | 0.00               | 0.00                | 0.00               | 0.00                | 0.00               | 17.81              | 31.3                | 162.29             | 20.98               | 70.98              |
| ENMMSG0000000203862 Hn1b        | 181.20             | 299.84              | 17.17              | 0.00                | 0.00               | 0.00               | 0.00                | 0.00               | 0.00                | 0.00               | 90.49              | 304.39              | 446.46             | 84.74               | 281.42             |
| ENMMSG000000020310 Hn1b         | 0.00               | 0.00                | 0.00               | 0.00                | 0.00               | 0.00               | 0.00                | 0.00               | 0.00                | 0.00               | 0.00               | 24.74               | 32.40              | 0.00                | 0.00               |
| ENMMSG0000000200294 H2t         | 0.00               | 0.00                | 0.00               | 0.00                | 0.00               | 0.00               | 0.00                | 0.00               | 0.00                | 0.00               | 11.74              | 44.67               | 53.32              | 253.18              | 0.00               |
| ENMMSG0000000208417 Phc2        | 19.12              | 0.00                | 0.00               | 0.00                | 0.00               | 0.00               | 0.00                | 0.00               | 0.00                | 0.00               | 0.00               | 0.00                | 0.00               | 0.00                | 0.00               |
| ENMMSG000000020079754 Prgmr2a/2 | 46.25              | 0.00                | 0.00               | 0.00                | 0.00               | 0.00               | 0.00                | 0.00               | 0.00                | 0.00               | 20.62              | 16.23               | 0.00               | 0.00                | 0.00               |
| ENMMSG0000000201178 Hn1b        | 193.79             | 277.27              | 77.38              | 62.00               | 37.87              | 91.15              | 291.76              | 0.00               | 0.00                | 0.00               | 89.72              | 268.23              | 142.74             | 142.74              | 142.74             |
| ENMMSG0000000202932 Acp2        | 10.23              | 0.00                | 0.00               | 0.00                | 0.00               | 0.00               | 0.00                | 0.00               | 0.00                | 0.00               | 33.87              | 320.81              | 44.82              | 302.77              | 56.87              |
| ENMMSG0000000200848 Gm1H3/2     | 48.97              | 0.00                | 0.00               | 28.50               | 0.00               | 0.00               | 0.00                | 0.00               | 0.00                | 0.00               | 37.88              | 11.59               | 0.00               | 1.44                | 42.41              |
| ENMMSG0000000203345 Cdk2        | 204.65             | 0.00                | 99.12              | 160.15              | 0.00               | 80.79              | 66.07               | 113.77             | 58.27               | 0.00               | 149.79             | 303.03              | 282.85             | 263.42              |                    |



|                        |             |        |         |         |         |        |         |         |         |         |         |         |         |         |         |         |         |         |         |          |          |          |          |          |          |
|------------------------|-------------|--------|---------|---------|---------|--------|---------|---------|---------|---------|---------|---------|---------|---------|---------|---------|---------|---------|---------|----------|----------|----------|----------|----------|----------|
| EMNSG000000000000484   | Hsp2b       | 51.40  | 94.87   | 0.00    | 13.12   | 0.00   | 37.44   | 0.00    | 0.00    | 36.97   | 290.61  | 259.86  | 37.46   | 107.75  | 374.19  | 282.28  | 7.40    | 42.76   | 342.83  | 102.34   | 80.39    | 383.31   | 94.49    | 29.85    |          |
| EMNSG0000000000002140  | Emc3        | 39.93  | 52.17   | 0.00    | 17.40   | 0.00   | 0.00    | 0.00    | 0.00    | 14.56   | 85.21   | 114.54  | 10.00   | 18.60   | 18.23   | 21.22   | 27.93   | 16.47   | 127.66  | 184.38   | 84.28    | 195.48   | 122.82   | 62.39    |          |
| EMNSG0000000000000780  | CuCh1       | 19.51  | 0.00    | 0.00    | 87.33   | 14.12  | 89.88   | 0.00    | 12.16   | 0.00    | 76.75   | 71.00   | 82.72   | 51.79   | 587.59  | 702.20  | 43.76   | 596.95  | 574.49  | 81.02    | 767.67   | 561.90   | 291.52   | 602.26   | 363.57   |
| EMNSG0000000000002424  | CooC5       | 86.24  | 0.00    | 0.00    | 52.17   | 0.00   | 0.00    | 0.00    | 0.00    | 13.94   | 100.93  | 21.82   | 140.24  | 0.00    | 43.36   | 61.23   | 43.35   | 112.01  | 108.99  | 130.76   | 138.40   | 0.00     | 61.87    | 74.47    | 44.00    |
| EMNSG0000000000000008  | U4          | 154.4  | 19.14   | 0.00    | 53.45   | 0.00   | 107.46  | 0.00    | 0.00    | 18.24   | 21.44   | 12.00   | 12.00   | 0.00    | 122.42  | 30.24   | 25.57   | 16.24   | 104.98  | 102.38   | 55.59    | 162.45   | 90.96    | 98.48    |          |
| EMNSG0000000000000920  | Np2         | 237.42 | 84.83   | 962.13  | 630.19  | 630.40 | 385.14  | 87.76   | 1066.37 | 1027.84 | 2578.89 | 2293.61 | 2343.84 | 4427.76 | 2798.44 | 2964.60 | 783.73  | 2925.43 | 2755.64 | 3100.30  | 2287.07  | 1924.00  | 2440.59  | 1870.48  |          |
| EMNSG0000000000002390  | CuCh1       | 153.25 | 213.87  | 940.51  | 2349.09 | 65.68  | 1623.77 | 1819.97 | 2448.62 | 82.75   | 75.84   | 171.88  | 658.63  | 1500.01 | 2833.65 | 906.63  | 67.49   | 1223.75 | 296.47  | 807.63   | 1793.83  | 1688.96  | 2662.01  | 752.21   | 543.63   |
| EMNSG0000000000000081  | Agp1        | 559.16 | 167.39  | 201.16  | 148.72  | 187.24 | 247.00  | 347.00  | 256.44  | 786.49  | 207.52  | 1133.99 | 103.99  | 69.00   | 55.67   | 67.67   | 162.24  | 100.00  | 100.00  | 100.00   | 210.00   | 124.52   | 2607.00  | 188.19   | 623.39   |
| EMNSG0000000000000879  | 17000210111 | 10.86  | 0.00    | 0.00    | 0.00    | 0.00   | 11.05   | 0.00    | 0.00    | 0.00    | 12.62   | 14.68   | 30.00   | 14.82   | 18.72   | 54.64   | 98.08   | 0.00    | 160.70  | 25.97    | 88.70    | 123.57   | 47.88    | 137.60   |          |
| EMNSG0000000000003801  | Scp1c1      | 141.95 | 0.00    | 0.00    | 0.00    | 0.00   | 0.00    | 0.00    | 0.00    | 42.01   | 191.71  | 297.34  | 120.00  | 229.86  | 420.03  | 69.63   | 147.17  | 656.18  | 100.70  | 106.82   | 83.78    | 123.72   | 54.29    | 347.81   |          |
| EMNSG0000000000000736  | Emc3        | 39.93  | 52.17   | 0.00    | 17.40   | 0.00   | 0.00    | 0.00    | 0.00    | 39.76   | 203.21  | 217.92  | 148.22  | 64.26   | 68.47   | 112.88  | 54.84   | 51.82   | 293.28  | 167.39   | 84.28    | 195.48   | 122.82   | 62.39    |          |
| EMNSG0000000000002811  | Mar01       | 55.29  | 81.68   | 0.00    | 0.00    | 49.11  | 22.33   | 0.00    | 22.90   | 0.00    | 101.44  | 248.99  | 1557.68 | 2617.48 | 1286.76 | 3027.03 | 2748.60 | 2069.00 | 1627.81 | 2487.77  | 2676.30  | 1754.22  | 1251.58  | 221.38   | 1250.37  |
| EMNSG0000000000000957  | Gmb1        | 68.21  | 0.00    | 0.00    | 0.00    | 0.00   | 0.00    | 0.00    | 0.00    | 0.00    | 23.88   | 30.15   | 0.00    | 2.81    | 0.00    | 71.63   | 33.97   | 161.81  | 143.93  | 10.76    | 3.98     | 0.00     | 28.04    | 47.99    |          |
| EMNSG0000000000000916  | Gmb1        | 16.82  | 191.20  | 0.00    | 0.00    | 0.00   | 0.00    | 0.00    | 0.00    | 19.11   | 40.00   | 30.14   | 0.00    | 0.00    | 0.00    | 111.49  | 0.00    | 78.56   | 122.19  | 11.91    | 89.00    | 121.91   | 93.00    | 38.93    |          |
| EMNSG0000000000000772  | Ah1c2       | 947.08 | 1695.88 | 1189.43 | 1458.84 | 81.771 | 1073.21 | 735.25  | 1250.78 | 2967.48 | 1229.57 | 1055.37 | 9129.60 | 6987.89 | 6240.66 | 6871.51 | 1184.70 | 1124.40 | 1251.19 | 13154.20 | 16977.39 | 19758.46 | 16726.70 | 12148.37 | 16509.88 |
| EMNSG0000000000000378  | Yh1c2       | 231.25 | 0.00    | 0.00    | 0.00    | 0.00   | 0.00    | 0.00    | 0.00    | 20.35   | 161.97  | 16.26   | 0.00    | 0.00    | 0.00    | 134.63  | 0.00    | 207.46  | 168.63  | 1008.27  | 1027.70  | 1607.70  | 642.82   | 520.70   |          |
| EMNSG0000000000001582  | Fly2c       | 49.78  | 0.00    | 0.00    | 0.69    | 35.60  | 44.26   | 0.00    | 0.00    | 0.00    | 0.00    | 0.00    | 0.00    | 0.00    | 15.45   | 34.25   | 125.02  | 65.85   | 86.77   | 54.24    | 12.84    | 74.84    | 0.00     | 59.22    |          |
| EMNSG00000000000003594 | Chna5       | 23.76  | 42.99   | 0.00    | 51.77   | 0.00   | 0.00    | 0.00    | 0.00    | 0.00    | 1060.82 | 1142.55 | 526.80  | 715.0   | 1300.17 | 1623.08 | 1266.11 | 63.42   | 892.44  | 1047.21  | 941.64   | 600.45   | 600.45   | 387.62   | 740.53   |
| EMNSG0000000000000588  | Agp1        | 559.16 | 167.39  | 201.16  | 148.72  | 187.24 | 247.00  | 347.00  | 256.44  | 786.49  | 207.52  | 1133.99 | 103.99  | 69.00   | 55.67   | 67.67   | 162.24  | 100.00  | 100.00  | 100.00   | 210.00   | 124.52   | 2607.00  | 188.19   | 623.39   |
| EMNSG00000000000009430 | Ugtp5b      | 43.68  | 0.00    | 0.00    | 0.00    | 0.00   | 0.00    | 0.00    | 0.00    | 0.00    | 45.53   | 22.42   | 0.00    | 10.44   | 314.63  | 0.00    | 0.00    | 0.00    | 97.21   | 0.00     | 11.06    | 106.92   | 32.83    | 162.55   |          |
| EMNSG00000000000003949 | C10710519   | 759.76 | 598.8   | 258     | 131.85  | 0.00   | 156.97  | 172.62  | 32.02   | 46.62   | 264.49  | 127.38  | 931.51  | 879.29  | 822.17  | 1123.46 | 2249.87 | 1244.22 | 2573.63 | 1403.10  | 1849.42  | 2052.83  | 1304.05  | 1754.37  | 1440.85  |
| EMNSG0000000000004871  | Pha2a7      | 290.13 | 0.00    | 0.00    | 0.00    | 0.00   | 0.00    | 0.00    | 0.00    | 0.00    | 783.84  | 749.08  | 142.20  | 929     | 605.6   | 1320.25 | 797.10  | 816.81  | 1777.95 | 922      | 697.06   | 497.09   | 556.05   | 459.86   |          |
| EMNSG00000000000000060 | Omp         | 479.9  | 141.86  | 0.00    | 0.00    | 0.06   | 0.00    | 0.00    | 0.00    | 51.28   | 117.67  | 742.21  | 888.97  | 542.89  | 1397.86 | 1072.83 | 893.54  | 1139.32 | 1151.38 | 1215.65  | 802.65   | 544.98   | 1177.41  | 761.34   | 961.88   |
| EMNSG0000000000000089  | Sb3a5e      | 377.54 | 164.43  | 114.02  | 177.41  | 396.31 | 176.33  | 276.34  | 109.48  | 0.00    | 106.18  | 706.69  | 415.12  | 421.56  | 691.67  | 1062.88 | 815.71  | 805.89  | 1009.27 | 847.24   | 380.43   | 280.46   | 387.25   | 540.39   | 378.22   |
| EMNSG00000000000005114 | Knu13       | 15.89  | 0.00    | 0.00    | 19.34   | 28.24  | 21.02   | 0.00    | 0.00    | 0.00    | 11.50   | 27.92   | 116.24  | 83.52   | 0.00    | 36.76   | 61.89   | 123.04  | 57.81   | 111.44   | 265.0    | 229.48   | 395.27   | 237.76   | 276.23   |
| EMNSG00000000000007659 | Ata4        | 151.39 | 0.00    | 0.00    | 22.70   | 0.00   | 0.00    | 0.00    | 0.00    | 0.00    | 23.99   | 245.83  | 147.14  | 334.09  | 205.44  | 291.25  | 262.56  | 246.88  | 908.10  | 341.88   | 238.60   | 370.14   | 500.10   | 430.31   | 379.30   |
| EMNSG00000000000016090 | Phy2b       | 35.31  | 103.17  | 0.00    | 32.44   | 19.84  | 97.21   | 0.00    | 0.00    | 0.00    | 13.72   | 109.94  | 1863.17 | 1098.84 | 1300.00 | 1760.69 | 1913.77 | 1937.18 | 1872.81 | 1722.66  | 1697.88  | 1674.70  | 1663.86  | 1576.24  | 1591.07  |
| EMNSG00000000000004976 | P2y1c       | 95.21  | 81.68   | 0.00    | 0.00    | 49.11  | 22.33   | 0.00    | 22.90   | 0.00    | 101.44  | 248.99  | 1557.68 | 2617.48 | 1286.76 | 3027.03 | 2748.60 | 2069.00 | 1627.81 | 2487.77  | 2676.30  | 1754.22  | 1251.58  | 221.38   | 1250.37  |
| EMNSG0000000000000957  | Gmb1        | 68.21  | 0.00    | 0.00    | 0.00    | 0.00   | 0.00    | 0.00    | 0.00    | 0.00    | 23.88   | 30.15   | 0.00    | 2.81    | 0.00    | 71.63   | 33.97   | 161.81  | 143.93  | 10.76    | 3.98     | 0.00     | 28.04    | 47.99    |          |
| EMNSG0000000000000916  | Gmb1        | 16.82  | 191.20  | 0.00    | 0.00    | 0.00   | 0.00    | 0.00    | 0.00    | 19.11   | 40.00   | 30.14   | 0.00    | 0.00    | 0.00    | 111.49  | 0.00    | 78.56   | 122.19  | 11.91    | 89.00    | 121.91   | 93.00    | 38.93    |          |
| EMNSG0000000000000772  | Ah1c2       | 947.08 | 1695.88 | 1189.43 | 1458.84 | 81.771 | 1073.21 | 735.25  | 1250.78 | 2967.48 | 1229.57 | 1055.37 | 9129.60 | 6987.89 | 6240.66 | 6871.51 | 1184.70 | 1124.40 | 1251.19 | 13154.20 | 16977.39 | 19758.46 | 16726.70 | 12148.37 | 16509.88 |
| EMNSG0000000000000378  | Yh1c2       | 231.25 | 0.00    | 0.00    | 0.00    | 0.00   | 0.00    | 0.00    | 0.00    | 20.35   | 161.97  | 16.26   | 0.00    | 0.00    | 0.00    | 134.63  | 0.00    | 207.46  | 168.63  | 1008.27  | 1027.70  | 1607.70  | 642.82   | 520.70   |          |
| EMNSG0000000000001582  | Fly2c       | 49.78  | 0.00    | 0.00    | 0.69    | 35.60  | 44.26   | 0.00    | 0.00    | 0.00    | 0.00    | 0.00    | 0.00    | 0.00    | 0.00    | 15.45   | 34.25   | 125.02  | 65.85   | 86.77    | 54.24    | 12.84    | 74.84    | 0.00     | 59.22    |
| EMNSG00000000000003594 | Chna5       | 23.76  | 42.99   | 0.00    | 51.77   | 0.00   | 0.00    | 0.00    | 0.00    | 0.00    | 1060.82 | 1142.55 | 526.80  | 715.0   | 1300.17 | 1623.08 | 1266.11 | 63.42   | 892.44  | 1047.21  | 941.64   | 600.45   | 600.45   | 387.62   | 740.53   |
| EMNSG0000000000000588  | Agp1        | 559.16 | 167.39  | 201.16  | 148.72  | 187.24 | 247.00  | 347.00  | 256.44  | 786.49  | 207.52  | 1133.99 | 103.99  | 69.00   | 55.67   | 67.67   | 162.24  | 100.00  | 100.00  | 100.00   | 210.00   | 124.52   | 2607.00  | 188.19   | 623.39   |
| EMNSG00000000000009430 | Ugtp5b      | 43.68  | 0.00    | 0.00    | 0.00    | 0.00   | 0.00    | 0.00    | 0.00    | 0.00    | 45.53   | 22.42   | 0.00    | 10.44   | 314.63  | 0.00    | 0.00    | 0.00    | 97.21   | 0.00     | 11.06    | 106.92   | 32.83    | 162.55   |          |
| EMNSG00000000000003949 | C10710519   | 759.76 | 598.8   | 258     | 131.85  | 0.00   | 156.97  | 172.62  | 32.02   | 46.62   | 264.49  | 127.38  | 931.51  | 879.29  | 822.17  | 1123.46 | 2249.87 | 1244.22 | 2573.63 | 1403.10  | 1849.42  | 2052.83  | 1304.05  | 1754.37  | 1440.85  |
| EMNSG0000000000004871  | Pha2a7      | 290.13 | 0.00    | 0.00    | 0.00    | 0.00   | 0.00    | 0.00    | 0.00    | 0.00    | 783.84  | 749.08  | 142.20  | 929     | 605.6   | 1320.25 | 797.10  | 816.81  | 1777.95 | 922      | 697.06   | 497.09   | 556.05   | 459.86   |          |
| EMNSG00000000000000060 | Omp         | 479.9  | 141.86  | 0.00    | 0.00    | 0.06   | 0.00    | 0.00    | 0.00    | 51.28   | 117.67  | 742.21  | 888.97  | 542.89  | 1397.86 | 1072.83 | 893.54  | 1139.32 | 1151.38 | 1215.65  | 802.65   | 544.98   | 1177.41  | 761.34   | 961.88   |
| EMNSG0000000000000089  | Sb3a5e      | 377.54 | 164.43  | 114.02  | 177.41  | 396.31 | 176.33  | 276.34  | 109.48  | 0.00    | 106.18  | 706.69  | 415.12  | 421.56  | 691.67  | 1062.88 | 815.71  | 805.89  | 1009.27 | 847.24   | 380.43   | 280.46   | 387.25   | 540.39   | 378.22   |
| EMNSG00000000000005114 | Knu13       | 15.89  | 0.00    | 0.00    | 19.34   | 28.24  | 21.02   | 0.00    | 0.00    | 0.00    | 11.50   | 27.92   | 116.24  | 83.52   | 0.00    | 36.76   | 61.89   | 123.04  | 57.81   | 111.44   | 265.0    | 229.48   | 395.27   | 237.76   | 276.23   |
| EMNSG00000000000007659 | Ata4        | 151.39 | 0.00    | 0.00    | 22.70   | 0.00   | 0.00    | 0.00    | 0.00    | 0.00    | 23.99   | 245.83  | 147.14  | 334.09  | 205.44  | 291.25  | 262.56  | 246.88  | 908.10  | 341.88   | 238.60   | 370.14   | 500.10   | 430.31   | 379.30   |
| EMNSG00000000000016090 | Phy2b       | 35.31  | 103.17  | 0.00    | 32.44   | 19.84  | 97.21   | 0.00    | 0.00    | 0.00    | 13.72   | 109.94  | 1863.17 | 1098.84 | 1300.00 | 1760.69 | 1913.77 | 1937.18 | 1872.81 | 1722.66  | 1697.88  | 1674.70  | 1663.86  | 1576.24  | 1591.07  |
| EMNSG00000000000004976 | P2y1c       | 95.21  | 81.68   | 0.00    | 0.00    | 49.11  | 22.33   | 0.00    | 22.90   | 0.00    | 101.44  | 248.99  | 1557.68 | 2617.48 |         |         |         |         |         |          |          |          |          |          |          |

|                     |             |         |         |         |         |         |         |         |         |         |         |         |         |         |         |         |         |         |         |         |         |         |         |         |         |         |         |
|---------------------|-------------|---------|---------|---------|---------|---------|---------|---------|---------|---------|---------|---------|---------|---------|---------|---------|---------|---------|---------|---------|---------|---------|---------|---------|---------|---------|---------|
| ENMMSG00000017453   | Ppox        | 94.38   | 0.00    | 45.46   | 0.00    | 0.00    | 19.05   | 0.00    | 19.32   | 0.00    | 0.00    | 64.92   | 100.50  | 39.41   | 237.52  | 206.88  | 298.79  | 290.58  | 226.48  | 134.89  | 203.32  | 182.52  | 59.24   | 180.14  | 136.36  | 154.38  |         |
| ENMMSG000000000983  | Q231        | 377.70  | 79.74   | 74.53   | 68.34   | 164.50  | 189.56  | 31.87   | 130.23  | 55.84   | 198.18  | 58.78   | 270.29  | 29.44   | 665.67  | 486.24  | 618.33  | 312.39  | 736.35  | 392.40  | 529.84  | 607.89  | 627.33  | 236.11  | 528.81  | 387.26  |         |
| ENMMSG000000005360  | PH25        | 113.07  | 0.00    | 0.00    | 0.00    | 0.00    | 0.00    | 0.00    | 0.00    | 0.00    | 0.00    | 0.00    | 96.63   | 14.78   | 21.25   | 28.10   | 32.05   | 59.15   | 82.02   | 61.42   | 50.00   | 17.71   | 0.00    | 18.84   | 16.78   | 0.00    |         |
| ENMMSG000000007010  | AW112010    | 1026.82 | 688.89  | 146.82  | 343.77  | 109.28  | 316.58  | 210.98  | 399.99  | 496.48  | 884.40  | 1845.17 | 1817.42 | 3094.29 | 1132.77 | 3034.21 | 2317.74 | 2817.32 | 2700.76 | 2676.16 | 3025.38 | 5106.87 | 4170.56 | 5072.52 | 3501.70 | 3532.78 |         |
| ENMMSG000000002373  | B3          | 6.00    | 0.00    | 0.00    | 0.00    | 0.00    | 0.00    | 0.00    | 0.00    | 0.00    | 0.00    | 0.00    | 0.00    | 0.00    | 0.00    | 0.00    | 0.00    | 0.00    | 0.00    | 0.00    | 0.00    | 0.00    | 0.00    | 0.00    | 0.00    | 0.00    |         |
| ENMMSG000000000126  | Sic7a2      | 263.82  | 64.1    | 833.87  | 263.82  | 0.00    | 129.52  | 204.92  | 132.13  | 14.12   | 1044.23 | 473.06  | 306.50  | 585.05  | 204.02  | 307.99  | 517.19  | 381.94  | 524.09  | 584.71  | 946.64  | 1140.20 | 600.83  | 335.91  | 862.39  | 279.83  |         |
| ENMMSG0000000003925 | Muc2        | 75.46   | 0.00    | 0.00    | 104.34  | 0.00    | 0.00    | 0.00    | 0.00    | 23.81   | 0.00    | 1665.40 | 1054.79 | 994.60  | 1263.27 | 601.96  | 590.45  | 190.48  | 166.89  | 225.81  | 236.49  | 1696.49 | 1646.49 | 249.99  | 71.50   |         |         |
| ENMMSG0000000002279 | Dem143      | 3029.25 | 1699.11 | 623.82  | 1160.31 | 67.36   | 279.48  | 383.61  | 686.20  | 291.39  | 379.29  | 720.16  | 8103.78 | 7192.93 | 6990.26 | 7881.18 | 7821.30 | 5881.28 | 6362.09 | 6362.09 | 6362.09 | 5921.33 | 4997.02 | 6430.27 | 3747.79 | 4176.02 |         |
| ENMMSG0000000003984 | Secm18      | 42.99   | 0.00    | 0.00    | 11.74   | 74.89   | 72.90   | 56.83   | 25.04   | 0.00    | 0.00    | 81.72   | 12.01   | 21.18   | 78.30   | 137.40  | 168.39  | 95.15   | 30.14   | 193.00  | 220.33  | 155.21  | 233.56  | 447.31  | 761.87  | 821.11  |         |
| ENMMSG0000000004428 | Phm14       | 1557.81 | 1978.58 | 988.96  | 1217.69 | 1423.93 | 1561.87 | 1800.83 | 1284.36 | 1462.82 | 1892.23 | 190.16  | 1062.16 | 1824.59 | 1068.01 | 3103.17 | 2361.09 | 1824.59 | 1634.34 | 1624.70 | 1000.42 | 1226.03 | 1285.43 | 1671.39 | 1430.52 | 1166.78 |         |
| ENMMSG0000000001187 | Egn1        | 368.02  | 216.02  | 0.00    | 0.00    | 0.00    | 0.00    | 0.00    | 20.60   | 0.00    | 114.21  | 73.00   | 381.66  | 152.44  | 296.76  | 472.42  | 0.00    | 227.16  | 241.81  | 312.36  | 343.25  | 602.89  | 338.49  | 522.13  | 236.11  | 387.26  |         |
| ENMMSG0000000002801 | Ea1         | 9.34    | 0.00    | 0.00    | 0.00    | 0.00    | 0.00    | 0.00    | 0.00    | 0.00    | 0.00    | 96.99   | 112.73  | 61.92   | 180.09  | 0.00    | 94.26   | 441.06  | 338.63  | 625.07  | 509.57  | 802.77  | 702.38  | 791.03  | 821.95  | 788.27  |         |
| ENMMSG0000000002394 | Guo3        | 133.83  | 202.04  | 0.00    | 0.00    | 0.00    | 0.00    | 0.00    | 32.92   | 0.00    | 0.00    | 26.99   | 221.96  | 139.10  | 128.02  | 1090.42 | 116.81  | 1080.66 | 329.38  | 540.77  | 329.37  | 816.64  | 72.78   | 83.64   | 994.68  | 80.54   |         |
| ENMMSG0000000002964 | Shg3        | 1136.35 | 497.82  | 0.00    | 43.49   | 69.36   | 69.96   | 28.42   | 30.77   | 152.87  | 0.00    | 291.66  | 1870.76 | 191.64  | 1860.00 | 6932.46 | 369.87  | 2689.99 | 3845.77 | 3691.67 | 3422.36 | 2278.12 | 1780.48 | 2191.17 | 2421.69 | 279.03  |         |
| ENMMSG0000000009203 | S10e10eP22F | 56.49   | 0.00    | 0.00    | 0.00    | 0.00    | 0.00    | 0.00    | 0.00    | 0.00    | 0.00    | 341.39  | 281.49  | 208.86  | 281.89  | 520.07  | 496.78  | 641.38  | 252.61  | 433.58  | 427.26  | 331.45  | 462.89  | 279.34  | 176.76  | 211.43  |         |
| ENMMSG0000000001075 | Dem17a      | 6.00    | 0.00    | 1.00    | 0.00    | 0.00    | 0.00    | 0.00    | 0.00    | 0.00    | 0.00    | 1.00    | 1.00    | 1.00    | 0.00    | 0.00    | 0.00    | 0.00    | 0.00    | 0.00    | 0.00    | 0.00    | 0.00    | 0.00    | 0.00    | 0.00    |         |
| ENMMSG0000000002965 | H16m        | 29.58   | 139.71  | 138.62  | 0.00    | 38.87   | 238.42  | 264.6   | 87.26   | 0.00    | 40.76   | 521.83  | 519.48  | 307.90  | 287.11  | 339.05  | 490.13  | 93.87   | 418.11  | 319.16  | 731.25  | 735.87  | 636.27  | 392.47  | 497.46  | 600.26  |         |
| ENMMSG0000000002861 | Sic2e4a     | 209.33  | 0.00    | 0.00    | 0.00    | 0.00    | 0.00    | 0.00    | 0.00    | 0.00    | 0.00    | 51.52   | 1083.80 | 50.78   | 861.32  | 462.80  | 677.70  | 383.98  | 605.39  | 414.31  | 818.37  | 458.88  | 633.83  | 342.00  | 335.85  | 319.94  |         |
| ENMMSG0000000003981 | Dem14       | 432.87  | 199.89  | 88.82   | 265.77  | 87.78   | 279.48  | 174.76  | 329.50  | 139.85  | 103.39  | 291.39  | 720.16  | 8103.78 | 7192.93 | 6990.26 | 7881.18 | 7821.30 | 5881.28 | 6362.09 | 6362.09 | 5921.33 | 4997.02 | 6430.27 | 3747.79 | 4176.02 |         |
| ENMMSG0000000002946 | 9320104.099 | 24.30   | 0.00    | 0.00    | 0.00    | 0.00    | 0.00    | 0.00    | 0.00    | 0.00    | 0.00    | 0.00    | 187.88  | 0.00    | 15.55   | 0.00    | 31.10   | 129.06  | 46.82   | 73.47   | 162.48  | 0.00    | 242.87  | 0.00    | 25.25   | 71.60   |         |
| ENMMSG0000000002707 | Coc180      | 19.69   | 191.30  | 0.00    | 0.00    | 0.00    | 0.00    | 0.00    | 0.00    | 0.00    | 0.00    | 0.00    | 113.84  | 99.89   | 39.15   | 0.00    | 114.99  | 113.12  | 83.84   | 102.37  | 113.14  | 151.98  | 184.48  | 0.00    | 25.25   | 0.00    |         |
| ENMMSG0000000003911 | Sep16b      | 63.55   | 119.22  | 23.10   | 35.80   | 9.21    | 30.87   | 0.00    | 84.44   | 87.00   | 117.65  | 62.83   | 104.38  | 122.00  | 33.93   | 389.33  | 210.19  | 168.12  | 161.16  | 362.82  | 380.73  | 446.76  | 126.32  | 190.82  | 99.28   | 188.82  |         |
| ENMMSG0000000001965 | 170003L.19f | 12.15   | 0.00    | 0.00    | 0.00    | 0.00    | 0.00    | 0.00    | 0.00    | 0.00    | 0.00    | 0.00    | 61.63   | 0.00    | 2.81    | 43.10   | 0.00    | 89.25   | 58.80   | 130.07  | 0.00    | 0.00    | 58.39   | 0.00    | 22.73   | 0.00    |         |
| ENMMSG0000000003928 | Mhm1        | 36.04   | 283.72  | 339.09  | 93.19   | 131.36  | 118.88  | 933.50  | 0.00    | 0.00    | 159.27  | 957.72  | 999.77  | 869.40  | 942.23  | 1347.68 | 1013.24 | 1714.47 | 1697.21 | 1597.26 | 1800.08 | 1725.20 | 2073.28 | 1399.84 | 1919.14 | 1653.40 |         |
| ENMMSG0000000002878 | Vir1        | 2064.20 | 1112.32 | 1477.84 | 1643.10 | 1623.40 | 1167.70 | 928.15  | 928.14  | 992.85  | 1208.71 | 3829.24 | 3441.67 | 3338.51 | 2393.50 | 2402.08 | 3601.49 | 3531.61 | 4012.37 | 4065.68 | 8010.61 | 3331.26 | 3184.08 | 3144.88 | 3438.04 | 3012.09 |         |
| ENMMSG0000000005573 | Phn1        | 455.10  | 192.37  | 224.32  | 231.84  | 64.45   | 192.44  | 521.42  | 339.58  | 43.12   | 107.13  | 1190.65 | 94.34   | 572.65  | 662.52  | 2440.87 | 1684.25 | 1224.60 | 69.29   | 797.30  | 1470.86 | 811.01  | 3811.25 | 1156.52 | 749.93  | 577.24  |         |
| ENMMSG0000000001721 | Gm1         | 563.07  | 0.00    | 0.00    | 0.00    | 0.00    | 0.00    | 0.00    | 0.00    | 0.00    | 0.00    | 0.00    | 30.15   | 162.29  | 74.00   | 258.69  | 81.06   | 38.32   | 33.75   | 0.00    | 14.46   | 0.00    | 53.01   | 0.00    | 49.24   | 0.00    |         |
| ENMMSG0000000003333 | Acsm1       | 1.00    | 0.00    | 0.00    | 0.00    | 0.00    | 0.00    | 0.00    | 0.00    | 0.00    | 0.00    | 0.00    | 0.00    | 0.00    | 0.00    | 0.00    | 0.00    | 0.00    | 0.00    | 0.00    | 0.00    | 0.00    | 0.00    | 0.00    | 0.00    | 0.00    |         |
| ENMMSG0000000007122 | G8B         | 2391.67 | 321.34  | 0.00    | 62.82   | 148.58  | 118.88  | 21.31   | 55.81   | 97.90   | 282.21  | 3708.11 | 4065.42 | 3979.62 | 3935.97 | 5918.18 | 7813.76 | 9611.32 | 5126.25 | 4854.84 | 5942.13 | 3438.18 | 1384.00 | 2278.24 | 3212.04 | 3397.42 |         |
| ENMMSG0000000000844 | Qp31        | 377.70  | 607.21  | 174.29  | 68.81   | 11.06   | 80.79   | 21.00   | 61.44   | 95.57   | 46.45   | 62.98   | 370.59  | 933.23  | 281.88  | 606.24  | 130.81  | 1113.55 | 1049.93 | 1165.94 | 1952.30 | 1172.85 | 607.89  | 627.33  | 1775.21 | 528.81  |         |
| ENMMSG0000000000950 | Qm1345      | 34.58   | 0.00    | 39.50   | 0.00    | 0.00    | 40.06   | 41.20   | 14.30   | 0.00    | 0.00    | 0.00    | 20.10   | 3.22    | 0.00    | 0.00    | 91.43   | 0.00    | 0.00    | 0.00    | 0.00    | 54.20   | 45.52   | 54.16   | 0.87    | 0.00    |         |
| ENMMSG0000000000822 | PK23120     | 1136.35 | 497.82  | 0.00    | 43.49   | 69.36   | 69.96   | 28.42   | 30.77   | 152.87  | 0.00    | 291.66  | 1870.76 | 191.64  | 1860.00 | 6932.46 | 369.87  | 2689.99 | 3845.77 | 3691.67 | 3422.36 | 2278.12 | 1780.48 | 2191.17 | 2421.69 | 279.03  |         |
| ENMMSG0000000002822 | T12         | 285.24  | 0.00    | 38.51   | 37.28   | 41.14   | 19.39   | 0.00    | 0.00    | 0.00    | 0.00    | 244.24  | 231.91  | 651.47  | 1020.53 | 1012.84 | 541.97  | 916.15  | 752.19  | 134.08  | 964.69  | 990.39  | 511.44  | 727.51  | 226.00  | 559.34  |         |
| ENMMSG0000000002845 | T12         | 14.28   | 0.00    | 58.59   | 31.68   | 3.68    | 206.89  | 64.65   | 52.95   | 0.00    | 0.00    | 44.54   | 548.86  | 80.53   | 417.61  | 426.89  | 668.38  | 272.84  | 393.07  | 333.61  | 388.35  | 354.42  | 325.48  | 243.68  | 86.14   | 0.00    |         |
| ENMMSG0000000005445 | Hm18        | 21.43   | 0.00    | 0.00    | 0.00    | 0.00    | 0.00    | 0.00    | 0.00    | 0.00    | 0.00    | 0.00    | 18.26   | 0.00    | 0.00    | 0.00    | 34.87   | 103.78  | 144.82  | 98.20   | 121.34  | 161.00  | 122.17  | 34.37   | 168.49  | 0.00    |         |
| ENMMSG0000000000031 | H19         | 193.07  | 364.32  | 1410.03 | 2477.48 | 897.42  | 428.11  | 1250.28 | 619.67  | 355.46  | 444.43  | 954.42  | 923.53  | 1782.86 | 1085.79 | 1840.35 | 957.63  | 1878.33 | 954.91  | 1881.24 | 1552.52 | 1299.82 | 1437.26 | 1281.38 | 1833.29 | 1380.45 |         |
| ENMMSG0000000003350 | Cd1         | 2397.70 | 0.00    | 0.00    | 0.00    | 0.00    | 0.00    | 0.00    | 0.00    | 0.00    | 0.00    | 0.00    | 32.08   | 221.09  | 57.98   | 203.08  | 0.00    | 290.14  | 25.37   | 276.56  | 480.87  | 626.26  | 599.79  | 528.90  | 738.21  | 372.47  | 437.40  |
| ENMMSG0000000004684 | A832092H15  | 39.25   | 82.75   | 0.00    | 0.00    | 0.00    | 0.00    | 0.00    | 0.00    | 0.00    | 0.00    | 0.00    | 0.00    | 0.00    | 0.00    | 0.00    | 0.00    | 0.00    | 0.00    | 0.00    | 0.00    | 0.00    | 0.00    | 0.00    | 0.00    | 0.00    | 0.00    |
| ENMMSG0000000001156 | Msd1        | 2550.24 | 1688.16 | 769.11  | 746.90  | 853.84  | 571.41  | 790.66  | 628.42  | 1039.57 | 1186.91 | 5665.34 | 7421.96 | 5058.77 | 6927.29 | 9313.81 | 6824.08 | 7191.91 | 6877.10 | 9002.21 | 7264.96 | 7311.34 | 6865.51 | 6244.04 | 5903.89 | 7509.86 |         |
| ENMMSG0000000003032 | Evl3        | 3947.32 | 2835.17 | 1456.49 | 1940.43 | 1783.79 | 1466.32 | 1800.65 | 1700.15 | 1474.28 | 2068.71 | 6577.59 | 1465.22 | 6879.25 | 6863.21 | 6863.21 | 5164.76 | 6826.46 | 6664.41 | 7233.47 | 7227.47 | 7811.11 | 7282.45 | 8051.09 | 6018.25 | 6015.50 | 6050.90 |
| ENMMSG0000000004863 | Hm13        | 362.13  | 0.00    | 0.00    | 0.00    | 0.00    | 0.00    | 0.00    | 0.00    | 0.00    | 0.00    | 0.00    | 0.00    | 0.00    | 0.00    | 0.00    | 0.00    | 0.00    | 0.00    | 0.00    | 0.00    | 0.00    | 0.00    | 0.00    | 0.00    | 0.00    | 0.00    |
| ENMMSG0000000004364 | Fam18a      | 1785.82 | 1067.18 | 595.46  | 509.44  | 530.96  | 488.66  | 674.87  | 646.86  | 219.10  | 171.59  | 3199.69 | 3241.36 | 3776.69 |         |         |         |         |         |         |         |         |         |         |         |         |         |

Supplementary Table D - Normalized counts of the top 500 specifically upregulated genes of PostArae across mTEC<sup>hi</sup>, mTEC<sup>int</sup>, mTEC<sup>lo</sup>, mTEC<sup>int</sup>, mTEC<sup>lo</sup> and mTEC<sup>lo</sup>.

| geneID             | mTEC <sup>hi</sup> | mTEC <sup>int</sup> | mTEC <sup>lo</sup> | mTEC <sup>int</sup> | mTEC <sup>lo</sup> |
|--------------------|--------------------|---------------------|--------------------|---------------------|--------------------|--------------------|--------------------|--------------------|--------------------|--------------------|--------------------|--------------------|--------------------|--------------------|--------------------|--------------------|--------------------|--------------------|
| ENMMSG00000000814  | 191                | 0                   | 0                  | 0                   | 0                  | 0                  | 0                  | 0                  | 42.01              | 0                  | 0                  | 0                  | 0                  | 0                  | 0                  | 0                  | 0                  | 0                  |
| ENMMSG00000004284  | 136                | 44                  | 0                  | 0                   | 0                  | 0                  | 0                  | 0                  | 0                  | 0                  | 0                  | 0                  | 0                  | 0                  | 0                  | 0                  | 0                  | 0                  |
| ENMMSG00000007664  | lgv12-48           | 0                   | 0                  | 0                   | 0                  | 0                  | 0                  | 0                  | 0                  | 0                  | 0                  | 0                  | 0                  | 0                  | 0                  | 0                  | 0                  | 0                  |
| ENMMSG00000008456  | 170091924          | 0                   | 0                  | 0                   | 0                  | 0                  | 0                  | 0                  | 0                  | 0                  | 0                  | 0                  | 0                  | 0                  | 0                  | 0                  | 0                  | 0                  |
| ENMMSG00000002030  | 214                | 93                  | 0                  | 0                   | 0                  | 0                  | 0                  | 0                  | 0                  | 0                  | 0                  | 0                  | 0                  | 0                  | 0                  | 0                  | 0                  | 0                  |
| ENMMSG00000005203  | Tax1135            | 40                  | 0                  | 0                   | 0                  | 0                  | 0                  | 0                  | 0                  | 0                  | 0                  | 0                  | 0                  | 0                  | 0                  | 0                  | 0                  | 0                  |
| ENMMSG00000003484  | Lyfz5              | 18.10               | 30.00              | 0.00                | 0.00               | 0.00               | 0.00               | 0.00               | 71.09              | 0.00               | 291.27             | 112.09             | 92.74              | 193.14             | 0.00               | 106.51             | 570.79             | 288.28             |
| ENMMSG00000003184  | Tax1113            | 4.59                | 0.00               | 0.00                | 0.00               | 0.00               | 0.00               | 0.00               | 104.00             | 0.00               | 0.00               | 0.00               | 0.00               | 0.00               | 0.00               | 113.14             | 214.89             | 82.00              |
| ENMMSG00000005926  | Tax1113            | 48.59               | 0.00               | 0.00                | 0.00               | 0.00               | 0.00               | 0.00               | 0.00               | 0.00               | 0.00               | 0.00               | 0.00               | 0.00               | 0.00               | 38.40              | 43.55              | 13.61              |
| ENMMSG00000007473  | 170020413          | 0.00                | 0.00               | 0.00                | 0.00               | 0.00               | 0.00               | 0.00               | 18.00              | 0.00               | 0.00               | 0.00               | 0.00               | 0.00               | 0.00               | 0.94               | 0.00               | 10.00              |
| ENMMSG00000004472  | Gm3730             | 0.00                | 0.00               | 0.00                | 0.00               | 0.00               | 0.00               | 0.00               | 3.50               | 0.00               | 0.00               | 0.00               | 0.00               | 0.00               | 0.00               | 127.65             | 47.91              | 17.40              |
| ENMMSG00000004914  | Mms5               | 45.79               | 0.00               | 0.00                | 0.00               | 0.00               | 0.00               | 0.00               | 0.00               | 0.00               | 0.00               | 0.00               | 0.00               | 0.00               | 0.00               | 20.74              | 64.34              | 0.00               |
| ENMMSG00000002400  | Enf197             | 0.00                | 0.00               | 0.00                | 0.00               | 0.00               | 0.00               | 0.00               | 0.00               | 0.00               | 0.00               | 0.00               | 0.00               | 0.00               | 0.00               | 0.00               | 0.00               | 0.00               |
| ENMMSG00000003740  | Tax1108            | 158.98              | 183.77             | 117.75              | 87.67              | 225.28             | 0.00               | 0.00               | 188.65             | 0.00               | 13.91              | 0.00               | 0.00               | 0.00               | 0.00               | 26.39              | 237.88             | 186.19             |
| ENMMSG00000004834  | Krl1               | 98.12               | 72.01              | 21.61               | 0.00               | 0.00               | 0.00               | 0.00               | 25.48              | 0.00               | 56.53              | 0.00               | 0.00               | 0.00               | 0.00               | 64.41              | 514.07             | 489.18             |
| ENMMSG00000004655  | Pain126            | 0.00                | 0.00               | 0.00                | 0.00               | 0.00               | 0.00               | 0.00               | 35.78              | 0.00               | 30.00              | 0.00               | 0.00               | 0.00               | 0.00               | 78.00              | 0.00               | 0.00               |
| ENMMSG00000005951  | Gm697              | 0.00                | 0.00               | 0.00                | 0.00               | 0.00               | 0.00               | 0.00               | 12.82              | 0.00               | 14.92              | 0.00               | 0.00               | 0.00               | 0.00               | 0.22               | 118.31             | 20.02              |
| ENMMSG00000004761  | Tsm14              | 28.97               | 0.00               | 0.00                | 0.00               | 0.00               | 0.00               | 0.00               | 17.07              | 0.00               | 0.00               | 0.00               | 0.00               | 0.00               | 0.00               | 60.19              | 45.73              | 0.00               |
| ENMMSG00000000206  | Enf197             | 176.82              | 135.82             | 36.72               | 0.00               | 0.00               | 0.00               | 0.00               | 0.00               | 0.00               | 172.00             | 117.50             | 110.23             | 146.00             | 0.00               | 389.48             | 150.22             | 146.00             |
| ENMMSG00000000953  | Gm29538            | 0.00                | 0.00               | 0.00                | 0.00               | 0.00               | 0.00               | 0.00               | 15.03              | 0.00               | 0.00               | 0.00               | 0.00               | 0.00               | 0.00               | 0.00               | 0.00               | 0.00               |
| ENMMSG00000002937  | 170011414          | 0.00                | 0.00               | 0.00                | 0.00               | 0.00               | 0.00               | 0.00               | 0.00               | 0.00               | 0.00               | 0.00               | 0.00               | 0.00               | 0.00               | 0.00               | 0.00               | 0.00               |
| ENMMSG00000002089  | Spa25              | 0.00                | 0.00               | 0.00                | 0.00               | 0.00               | 0.00               | 0.00               | 0.00               | 0.00               | 0.00               | 0.00               | 0.00               | 0.00               | 0.00               | 0.00               | 0.00               | 0.00               |
| ENMMSG00000005212  | Gc177              | 228.02              | 0.00               | 277.24              | 595.04             | 790.61             | 40.72              | 132.84             | 80.86              | 404.41             | 214.25             | 142.05             | 195.58             | 248.07             | 5.22               | 96.26              | 352.51             | 1854.73            |
| ENMMSG00000003723  | Alm33              | 84.10               | 15.05              | 0.00                | 25.54              | 1.05               | 0.00               | 0.00               | 32.77              | 0.00               | 172.13             | 122.91             | 78.71              | 109.92             | 0.00               | 196.05             | 127.65             | 78.00              |
| ENMMSG00000002439  | Gm32               | 14929.06            | 2498.89            | 1785.84             | 918.10             | 1455.87            | 194.41             | 239.40             | 206.79             | 31.47              | 538.29             | 77.14              | 365.42             | 269.43             | 318.43             | 527.35             | 755.35             | 3302.28            |
| ENMMSG00000006777  | Tspan6             | 186.72              | 333.16             | 415.85              | 654.40             | 400.22             | 448.62             | 703.28             | 329.87             | 329.82             | 660.76             | 128.00             | 380.00             | 361.01             | 78.52              | 250.57             | 137.92             | 94.26              |
| ENMMSG00000002916  | Aadm2c             | 0.00                | 0.00               | 0.00                | 0.00               | 0.00               | 0.00               | 0.00               | 0.00               | 0.00               | 0.00               | 0.00               | 0.00               | 0.00               | 0.00               | 95.05              | 23.49              | 0.00               |
| ENMMSG00000000916  | Hm190              | 0.00                | 0.00               | 0.00                | 0.00               | 0.00               | 0.00               | 0.00               | 0.00               | 0.00               | 0.00               | 0.00               | 0.00               | 0.00               | 0.00               | 29.28              | 0.00               | 0.00               |
| ENMMSG00000007877  | Ighp-3             | 34.58               | 0.00               | 0.00                | 0.00               | 0.00               | 0.00               | 0.00               | 0.00               | 0.00               | 0.00               | 0.00               | 0.00               | 0.00               | 0.00               | 19.79              | 0.00               | 0.00               |
| G1330074013        | 0                  | 36.45               | 0.00               | 0.00                | 0.00               | 0.00               | 0.00               | 0.00               | 0.00               | 0.00               | 174.13             | 0.00               | 0.00               | 0.00               | 0.00               | 15.84              | 19.00              | 144.53             |
| ENMMSG00000002911  | Abp124             | 22.43               | 0.00               | 0.00                | 0.00               | 0.00               | 0.00               | 0.00               | 0.00               | 0.00               | 0.00               | 0.00               | 0.00               | 0.00               | 0.00               | 12.44              | 0.00               | 0.00               |
| ENMMSG00000003925  | Alg9               | 17.82               | 56.96              | 39.50               | 20.71              | 47.26              | 0.00               | 147.76             | 0.00               | 102.56             | 0.00               | 95.47              | 109.00             | 257.34             | 78.30              | 409.45             | 163.06             | 619.56             |
| ENMMSG00000004509  | Gm29131            | 288.78              | 13                 | 132.0               | 105.36             | 296.87             | 0.00               | 238.29             | 0.00               | 238.29             | 0.00               | 238.29             | 0.00               | 238.29             | 0.00               | 238.29             | 0.00               | 238.29             |
| ENMMSG00000004581  | Slim6              | 1015.80             | 528.75             | 316.73              | 466.64             | 433.38             | 141.21             | 151.31             | 67.98              | 206.28             | 163.06             | 66.30              | 67.25              | 143.74             | 33.93              | 301.82             | 855.33             | 1275.03            |
| ENMMSG00000008635  | Gm15559            | 0.00                | 0.00               | 0.00                | 0.00               | 0.00               | 0.00               | 0.00               | 0.00               | 0.00               | 0.00               | 0.00               | 0.00               | 0.00               | 0.00               | 0.00               | 0.00               | 0.00               |
| ENMMSG00000002377  | Enf197             | 159.17              | 120.12             | 88.80               | 146.86             | 141.79             | 102.44             | 0.00               | 0.00               | 0.00               | 0.00               | 0.00               | 0.00               | 0.00               | 0.00               | 119.32             | 224.27             | 224.27             |
| ENMMSG00000009716  | Plm2               | 0.00                | 0.00               | 0.00                | 0.00               | 0.00               | 0.00               | 0.00               | 0.00               | 0.00               | 0.00               | 0.00               | 0.00               | 0.00               | 0.00               | 7.54               | 50.85              | 50.00              |
| ENMMSG00000007302  | Edc2               | 19.62               | 0.00               | 7.51                | 13.81              | 18.41              | 21.87              | 46.18              | 0.72               | 0.00               | 53.46              | 0.00               | 23.18              | 13.05              | 152.29             | 87.96              | 57.37              | 197.88             |
| ENMMSG00000004092  | Gm3281             | 0.00                | 0.00               | 0.00                | 0.00               | 0.00               | 0.00               | 0.00               | 0.00               | 0.00               | 0.00               | 0.00               | 0.00               | 0.00               | 0.00               | 15.48              | 0.00               | 0.00               |
| ENMMSG00000000914  | 2610200404         | 0.00                | 0.00               | 0.00                | 0.00               | 0.00               | 0.00               | 0.00               | 0.00               | 0.00               | 0.00               | 0.00               | 0.00               | 0.00               | 0.00               | 0.00               | 0.00               | 0.00               |
| ENMMSG00000000749  | Krtap9             | 538.27              | 296.59             | 437.47              | 312.02             | 249.21             | 138.90             | 187.49             | 1067.60            | 1729.51            | 1238.10            | 274.41             | 449.91             | 948.56             | 167.04             | 237.32             | 948.56             | 920.07             |
| ENMMSG00000000674  | Gm33               | 49.09               | 31.00              | 49.09               | 31.00              | 49.09              | 31.00              | 49.09              | 31.00              | 49.09              | 31.00              | 49.09              | 31.00              | 49.09              | 31.00              | 49.09              | 31.00              | 49.09              |
| ENMMSG00000004061  | Pf2                | 54.07               | 18                 | 2634.10             | 3008.60            | 2224.14            | 3628.96            | 320.52             | 758.89             | 153.13             | 179.48             | 514.77             | 40.74              | 303.03             | 243.88             | 247.96             | 648.49             | 994.39             |
| ENMMSG00000002631  | Rpl3               | 6.00                | 0.00               | 0.00                | 0.00               | 0.00               | 0.00               | 0.00               | 0.00               | 0.00               | 0.00               | 0.00               | 0.00               | 0.00               | 0.00               | 9.43               | 21.71              | 21.80              |
| ENMMSG00000000817  | Ighp-3             | 73.55               | 45.88              | 48.44               | 48.00              | 48.01              | 103.12             | 42.96              | 0.00               | 0.00               | 0.00               | 0.00               | 0.00               | 0.00               | 0.00               | 264.40             | 94.98              | 208.67             |
| ENMMSG00000003765  | Cat4               | 118.68              | 146.00             | 32.05               | 0.00               | 0.00               | 0.00               | 0.00               | 0.00               | 0.00               | 184.82             | 123.14             | 83.48              | 83.52              | 1270.96            | 116.4              | 48.73              | 371.47             |
| ENMMSG00000008103  | Gm11014            | 3.93                | 207.42             | 0.75                | 9.21               | 86.86              | 0.00               | 0.00               | 0.00               | 0.00               | 0.76               | 29.38              | 0.00               | 0.00               | 0.00               | 18.89              | 22.83              | 52.28              |
| ENMMSG00000000953  | Gm318              | 0.00                | 0.00               | 0.00                | 0.00               | 0.00               | 0.00               | 0.00               | 0.00               | 0.00               | 36.12              | 14.72              | 9.52               | 0.00               | 0.00               | 18.15              | 48.44              | 58.55              |
| ENMMSG00000007713  | Anu383             | 144.72              | 158.74             | 17.12               | 36.77              | 61.74              | 104.43             | 36.49              | 0.00               | 52.14              | 0.00               | 0.00               | 0.00               | 0.00               | 0.00               | 1.89               | 38.11              | 287.55             |
| ENMMSG00000002174  | Gm1064             | 0.00                | 0.00               | 0.00                | 0.00               | 0.00               | 0.00               | 0.00               | 0.00               | 0.00               | 0.00               | 0.00               | 0.00               | 0.00               | 0.00               | 45.00              | 0.00               | 0.00               |
| ENMMSG00000000959  | Rpl21              | 111.11              | 763.04             | 484.42              | 320.99             | 51.12              | 88.98              | 69.91              | 41.50              | 102.56             | 200.03             | 0.00               | 29.38              | 76.19              | 0.00               | 102.74             | 391.25             | 517.20             |
| ENMMSG00000000461  | Spf5               | 159.80              | 45.14              | 32.05               | 85.60              | 117.24             | 0.00               | 46.18              | 25.76              | 0.00               | 54.22              | 0.00               | 136.79             | 0.00               | 0.00               | 145.29             | 219.95             | 83.10              |
| ENMMSG00000000746  | 2610002465         | 51.00               | 102.00             | 0.00                | 0.00               | 0.00               | 0.00               | 0.00               | 0.00               | 0.00               | 0.00               | 0.00               | 0.00               | 0.00               | 0.00               | 0.00               | 0.00               | 0.00               |
| ENMMSG000000009123 | AUO4972            | 0.00                | 0.00               | 0.00                | 0.00               | 0.00               | 0.00               | 0.00               | 0.00               | 0.00               | 0.00               | 0.00               | 0.00               | 0.00               | 0.00               | 0.00               | 0.00               | 0.00               |
| ENMMSG000000009070 | Rpl4               | 0.00                | 0.00               | 0.00                | 0.00               | 0.00               | 0.00               | 0.00               | 0.00               | 0.00               | 0.00               | 0.00               | 0.00               | 0.00               | 0.00               | 0.00               | 0.00               | 0.00               |
| ENMMSG00000004135  | Ighp-3             | 95.32               | 102.00             | 44.25               | 81.00              | 52.24              | 0.00               | 57.34              | 0.00               | 0.00               | 119.60             | 73.58              | 80.00              | 0.00               | 0.00               | 159.03             | 109.23             | 90.00              |
| ENMMSG00000002986  | Lyfz6c             | 103.73              | 0.00               | 41.73               | 35.00              | 0.00               | 0.00               | 0.00               | 0.00               | 0.00               | 324.58             | 188.62             | 150.70             | 180.09             | 409.45             | 91.43              | 362.19             | 391.98             |
| ENMMSG00000008199  | Gm14921            | 53.97               | 0.00               | 28.52               | 0.00               | 0.00               | 0.00               | 0.00               | 0.00               | 0.00               | 0.95               | 0.00               | 27.83              | 2.32               | 0.00               | 1.44               | 0.00               | 1.00               |
| ENMMSG00000004430  | Gm3281             | 245.17              | 93.26              | 56.16               | 24.11              | 69.89              | 23.84              | 84.82              | 0.00               | 0.00               | 19.78              | 16.16              | 19.78              | 0.00               | 0.00               | 20.11              | 94.15              | 68.82              |
| ENMMSG00000007877  | Ltd1a1             | 53.27               | 0.00               | 0.00                | 0.00               | 0.00               | 0.00               | 0.00               | 0.00               | 0.00               | 83.25              | 37.11              | 1.55               | 36.54              | 0.00               | 195.11             | 45.68              | 11.80              |
| ENMMSG00000000761  | A63073D07          | 81.30               | 25.79              | 0.00                | 89.05              | 25.17              | 0.00               | 0.00               | 0.00               | 0.00               | 23.70              | 0.00               | 42.52              | 0.00               | 0.00               | 6.00               | 104.82             | 240.63             |
| ENMMSG00000002806  | Gm127              | 0.00                | 0.00               | 0.00                | 0.00               | 0.00               | 0.00               | 0.00               | 0.00               | 0.00               | 0.00               | 0.00               | 0.00               | 0.00               | 0.00               | 0.00               | 0.00               | 0.00               |
| ENMMSG00000000538  | Ccd13              | 180.36              | 155.83             | 98.37               | 49.01              | 38.06              | 24.96              | 52.57              | 61.54              | 233.               |                    |                    |                    |                    |                    |                    |                    |                    |
